# Supplementary material for: The planctomycete Stieleria maiorica Mal15T employs stieleriacines to alter the species composition in marine biofilms
Source: PubMed Central journal article supplement (PMC7293339; doi:10.1038/s42003-020-0993-2), 2020-06-12
Supplement: 42003_2020_993_MOESM1_ESM.pdf [file 42003_2020_993_MOESM1_ESM.pdf]

## Supplementary Figures

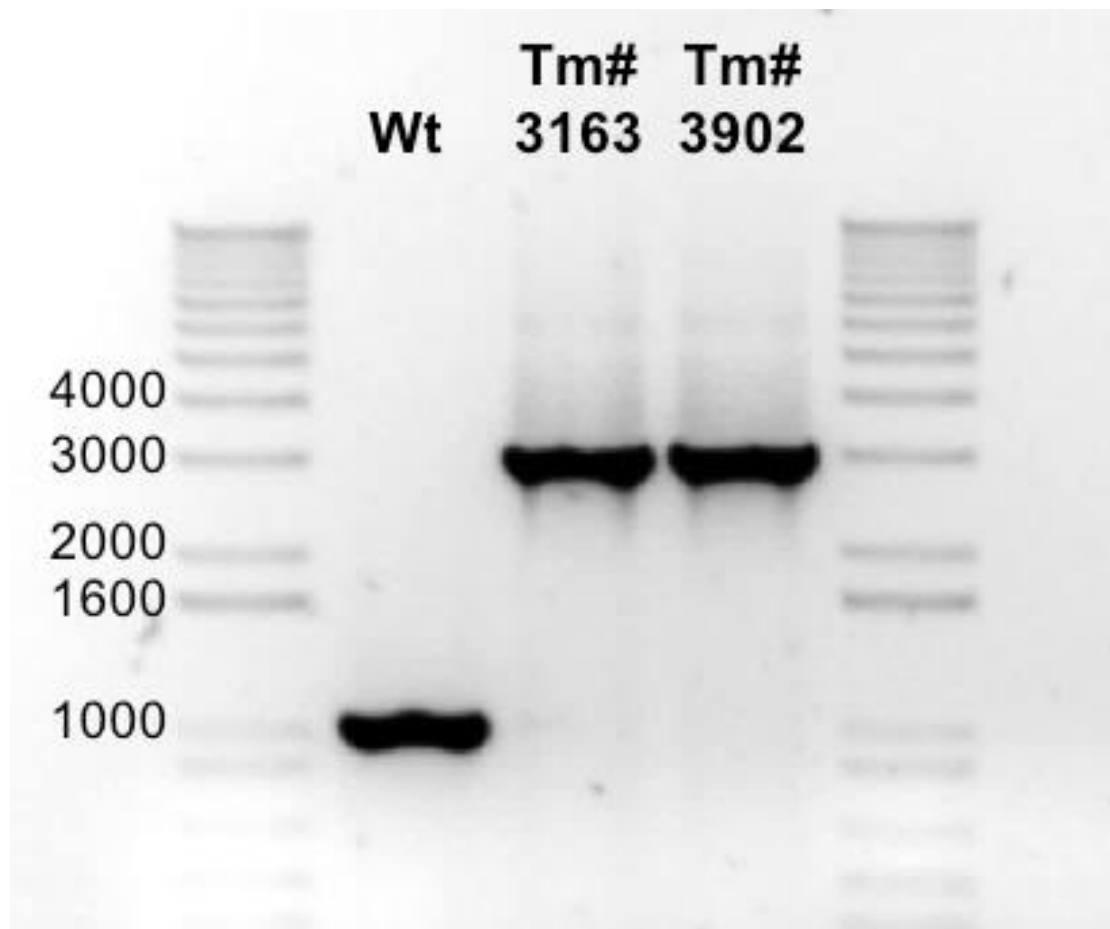

**Supplementary Fig. 1. Agarose gel electrophoresis after PCR for verification of correct insertion of the EZ-Tn5 transposon in the *luxR* gene.** The PCR fragments of wild-type DNA (Wt) have a size of about 1000 bp. The PCR products from the transposon mutants Tm#3163 and Tm#3902 have a size of about 3000 bp, thus showing the expected insertion of the EZ-Tn5 transposon with a size of 2001 bp.

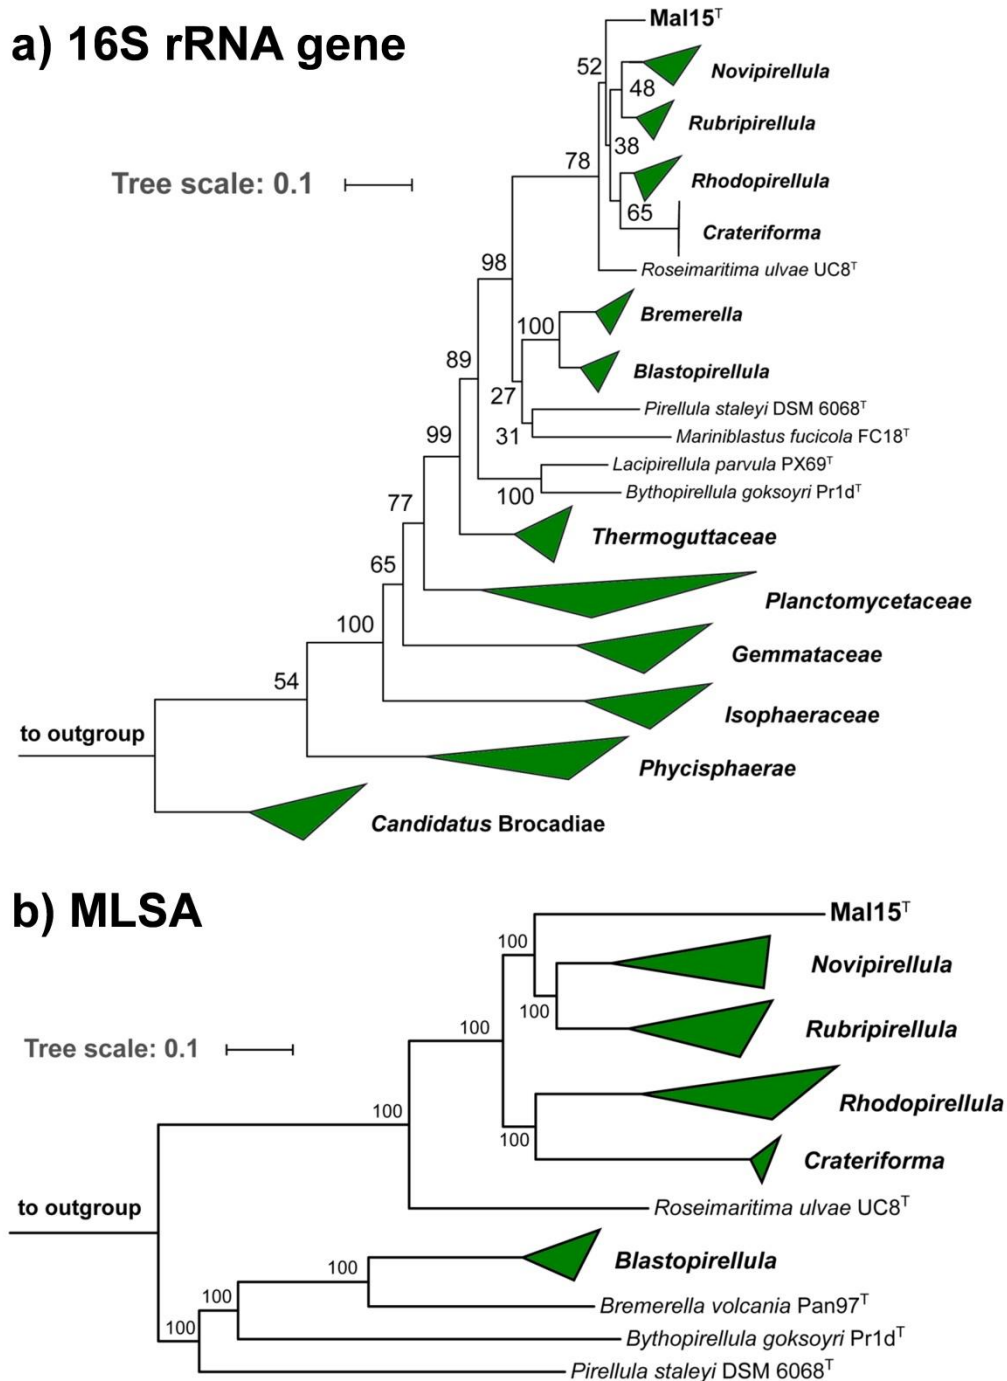

**Supplementary Fig. 2. Maximum likelihood 16S rRNA gene sequence- and MLSA-based phylogeny.** The phylogenetic trees show the position of strain Mal15<sup>T</sup> in relation to its closest described relatives. 16S rRNA gene sequence- and MLSA-based phylogeny were computed using the maximum likelihood method. Bootstrap values after 1,000 re-samplings (16S rRNA gene) / 500 re-samplings (MLSA) are given at the nodes (in %). The outgroup for the 16S rRNA gene sequence-based tree consists of three 16S rRNA genes from the PVC superphylum outside of the phylum *Planctomycetes*. In the MLSA-based tree, three species of the family *Planctomycetaceae* served as outgroup.

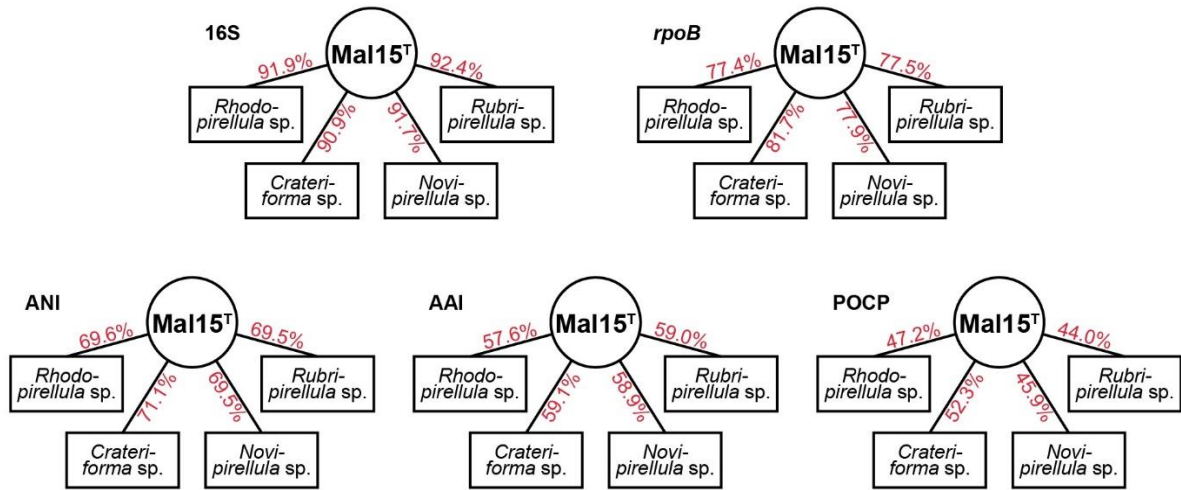

**Supplementary Fig. 3. Phylogenetic marker values of isolate Mal15<sup>T</sup> and its closest neighbours.** The numbers give the minimal values shared between strain Mal15<sup>T</sup> and any described member of the respective genera for 16S rRNA gene sequence identity (16S), *rpoB* nucleotide sequences identity (*rpoB*), average nucleotide identity (ANI), average amino acid identity (AAI) and percentage of conserved proteins (POCP).

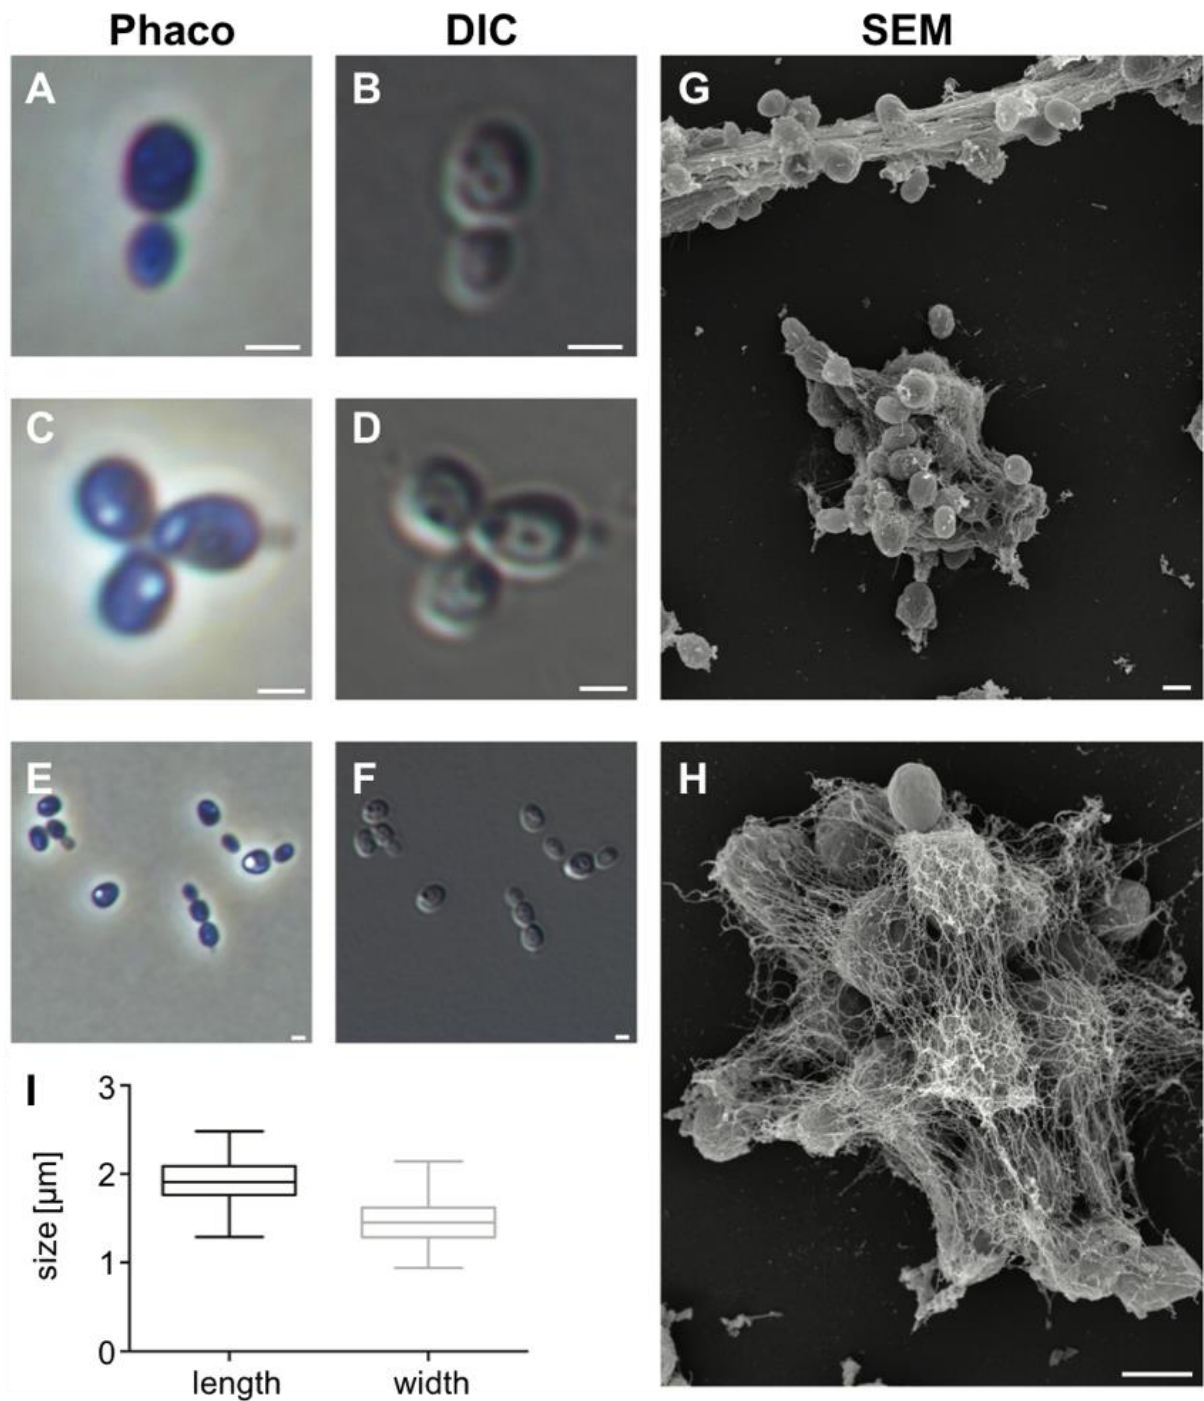

**Supplementary Fig. 4. Morphology of strain Mal15<sup>T</sup>.** **A-F** Phase contrast (Phaco) and differential interference contrast (DIC) microscopy of Mal15<sup>T</sup> cells. Cells are round to pear-shaped and sometimes connected to rosettes or chains with their narrow poles. **g-h** Scanning electron microscopy (SEM) revealed the existence of an extracellular matrix which interconnects cells in aggregates. **I** Cell size ranges between  $1.9 \pm 0.2 \times 1.4 \pm 0.2 \mu\text{m}$  ( $n=100$  cells). Scale bar, 1  $\mu\text{m}$ .

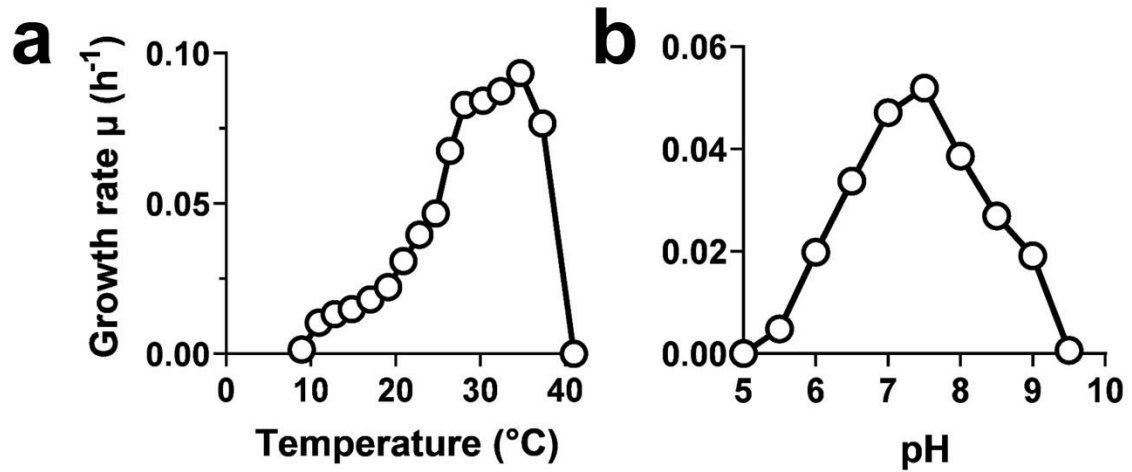

**Supplementary Fig. 5. Temperature and pH optimum of strain Mal15<sup>T</sup>.** The strain was incubated at temperatures from 8.9 °C to 37.3 °C (a) and at a pH range of 5.0 to 9.5 (b) in M1H NAG ASW. Maximal growth rates were calculated from average OD<sub>600</sub> values obtained from triplicate cultivations. Optimal growth was observed at 35 °C and pH 7.5.

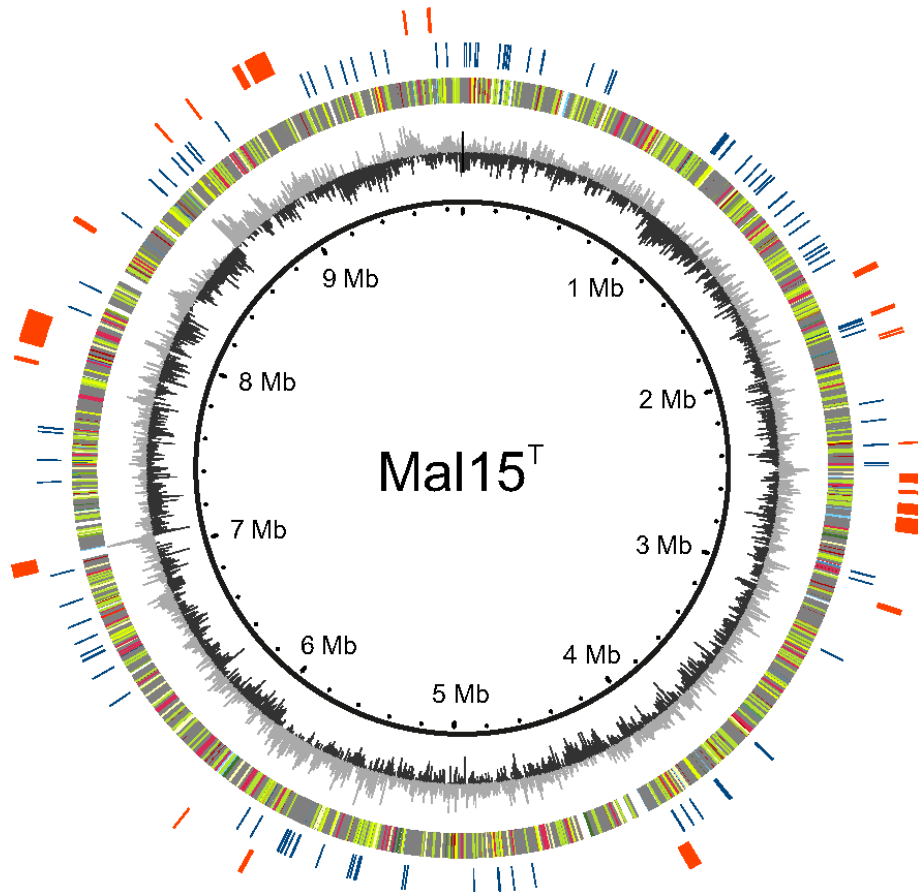

**Cluster of Orthologous Groups (COGs)**

- [S] Function unknown    ■ [D] Cell cycle control, cell division, chromosome partitioning
- [M] Cell wall/membrane/envelope biogenesis    ■ [N] Cell motility
- [O] Post-translational modification, protein turnover, and chaperones
- [T] Signal transduction mechanisms    ■ [U] Intracellular trafficking, secretion, and vesicular transport
- [V] Defense mechanisms    ■ [A] RNA processing and modification
- [J] Translation, ribosomal structure and biogenesis    ■ [K] Transcription
- [L] Replication, recombination and repair    ■ [C] Energy production and conversion
- [E] Amino acid transport and metabolism    ■ [F] Nucleotide transport and metabolism
- [G] Carbohydrate transport and metabolism    ■ [H] Coenzyme transport and metabolism
- [I] Lipid transport and metabolism    ■ [P] Inorganic ion transport and metabolism
- [Q] Secondary metabolites biosynthesis, transport, and catabolism

**Core genome**

- Core genome of the Planctomycetes phylum

**Genomic Islands**

- Predicted to be acquired by horizontal gene transfer

**Supplementary Fig. 6. Circular genome plots of strain Mal15<sup>T</sup>.** The genome of strain Mal15<sup>T</sup> is visualised by five circles. The innermost circle is labeled with the strain name and represents the circularised genome; the plotted ticks indicate the genome size (0.2 Mb per tick). The second circle depicts the GC skew in light and dark grey. The middle circle shows the color-coded COG (Cluster of Orthologous Groups) categories of the encoded proteins. The fourth circle illustrates the core genome, which was determined by the reciprocal best alignment method on three different phylogenetic levels as indicated by color. Finally, predicted genomic islands are indicated on the outermost circle.

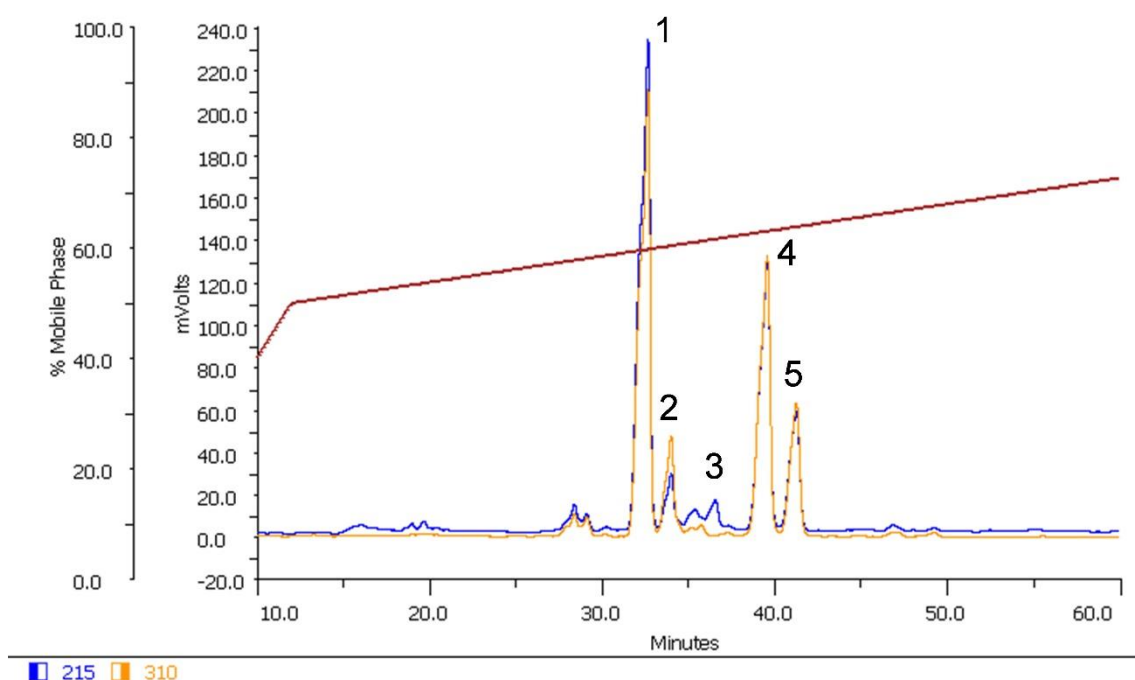

**Supplementary Fig. 7. UV-vis fractionation chromatogram for crude extract of strain Mal15<sup>T</sup>.** The crude extract was fractionated using preparative RP-HPLC. A Kromasil C<sub>18</sub> column served as stationary phase. Deionised water with 0.1% formic acid as solvent A, and acetonitrile with 0.1% formic acid as solvent B, were used as mobile phase. The used elution gradient (brown curve) was 40% B for 10 min, increased to 50% B in 3 min, and a gradient from 50–70% B in 60 min, thereafter 100% B for 10 min. UV detection was carried out at 215 nm (blue curve) and 310 nm (orange curve). Stieleriacine A<sub>1</sub> (**1**) was obtained at a retention time ( $t_R$ ) = 32.5 min, B<sub>1</sub> (**2**) at  $t_R$  = 34.0 min, C (**3**) at  $t_R$  = 36.0 min, A<sub>2</sub> (**4**) at  $t_R$  = 39.5 min, B<sub>2</sub> (**5**) at  $t_R$  = 41.1 min.

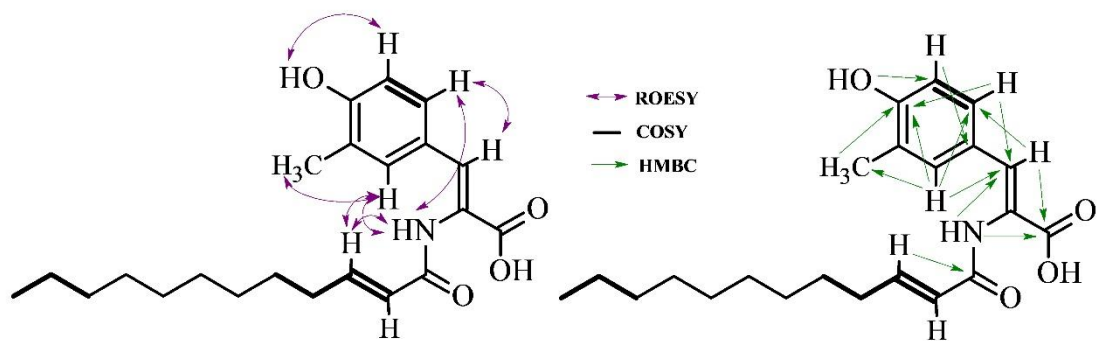

Supplementary Fig. 8. Key COSY, HMBC, and ROESY correlations for stieleriacine A<sub>1</sub> and A<sub>2</sub>.



Supplementary Fig. 9. HRESIMS data of stieleriacine A<sub>1</sub> (1)

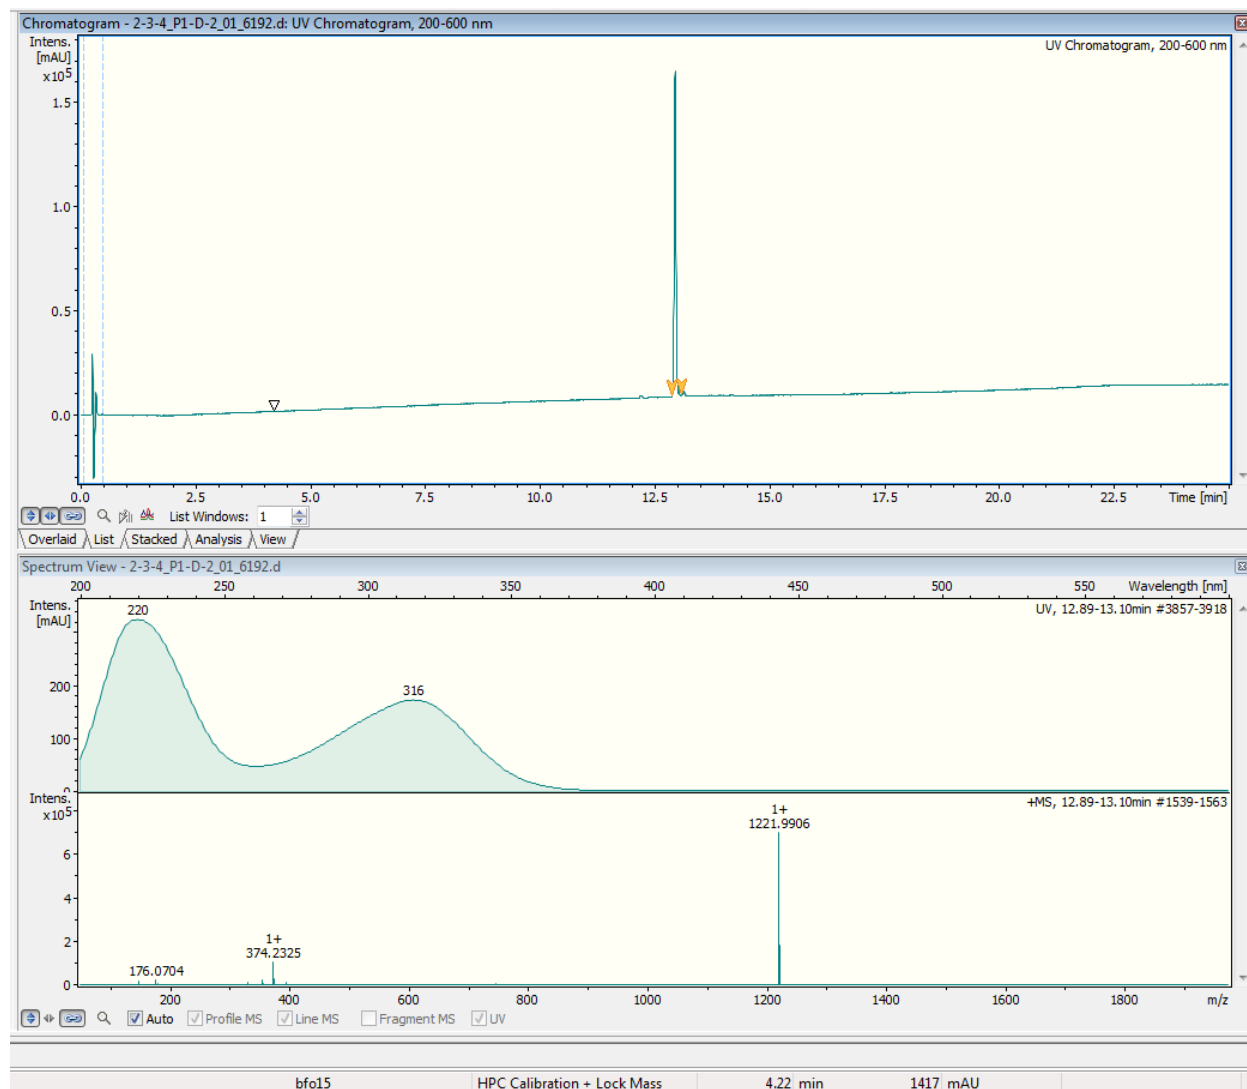

Supplementary Fig. 10. <sup>1</sup>H NMR spectrum (700 MHz, DMSO-d<sub>6</sub>) of stieleriace A<sub>1</sub> (1)

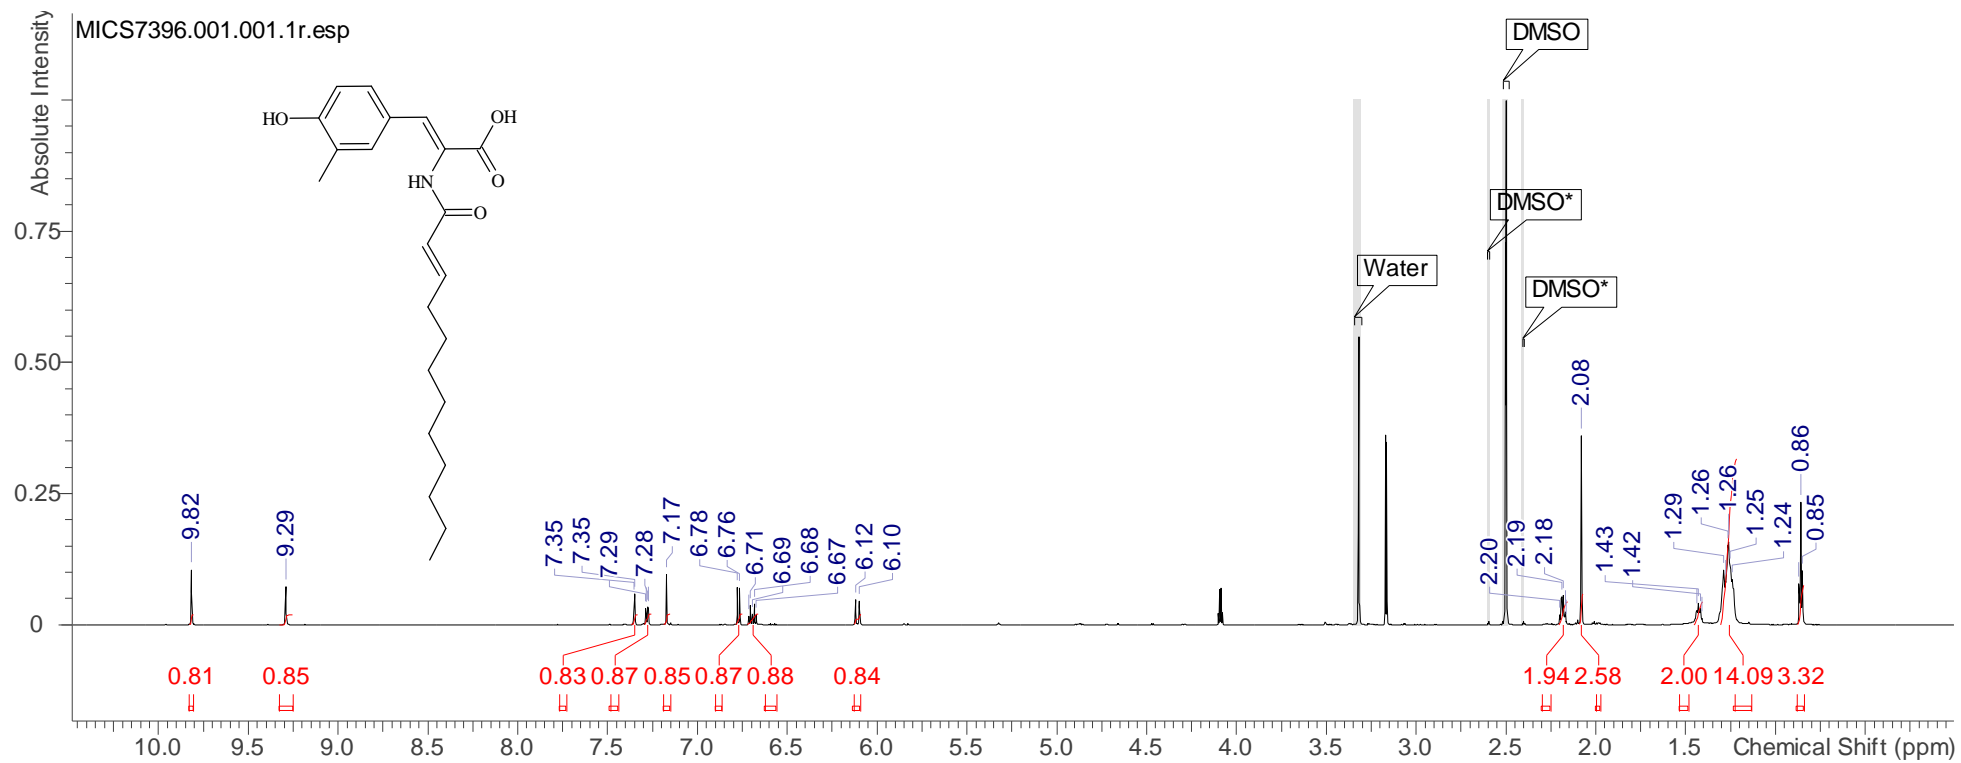

Supplementary Fig. 11.  $^{13}\text{C}$  NMR spectrum (176 MHz,  $\text{DMSO-}d_6$ ) of stieleriaine  $\text{A}_1$  (1)

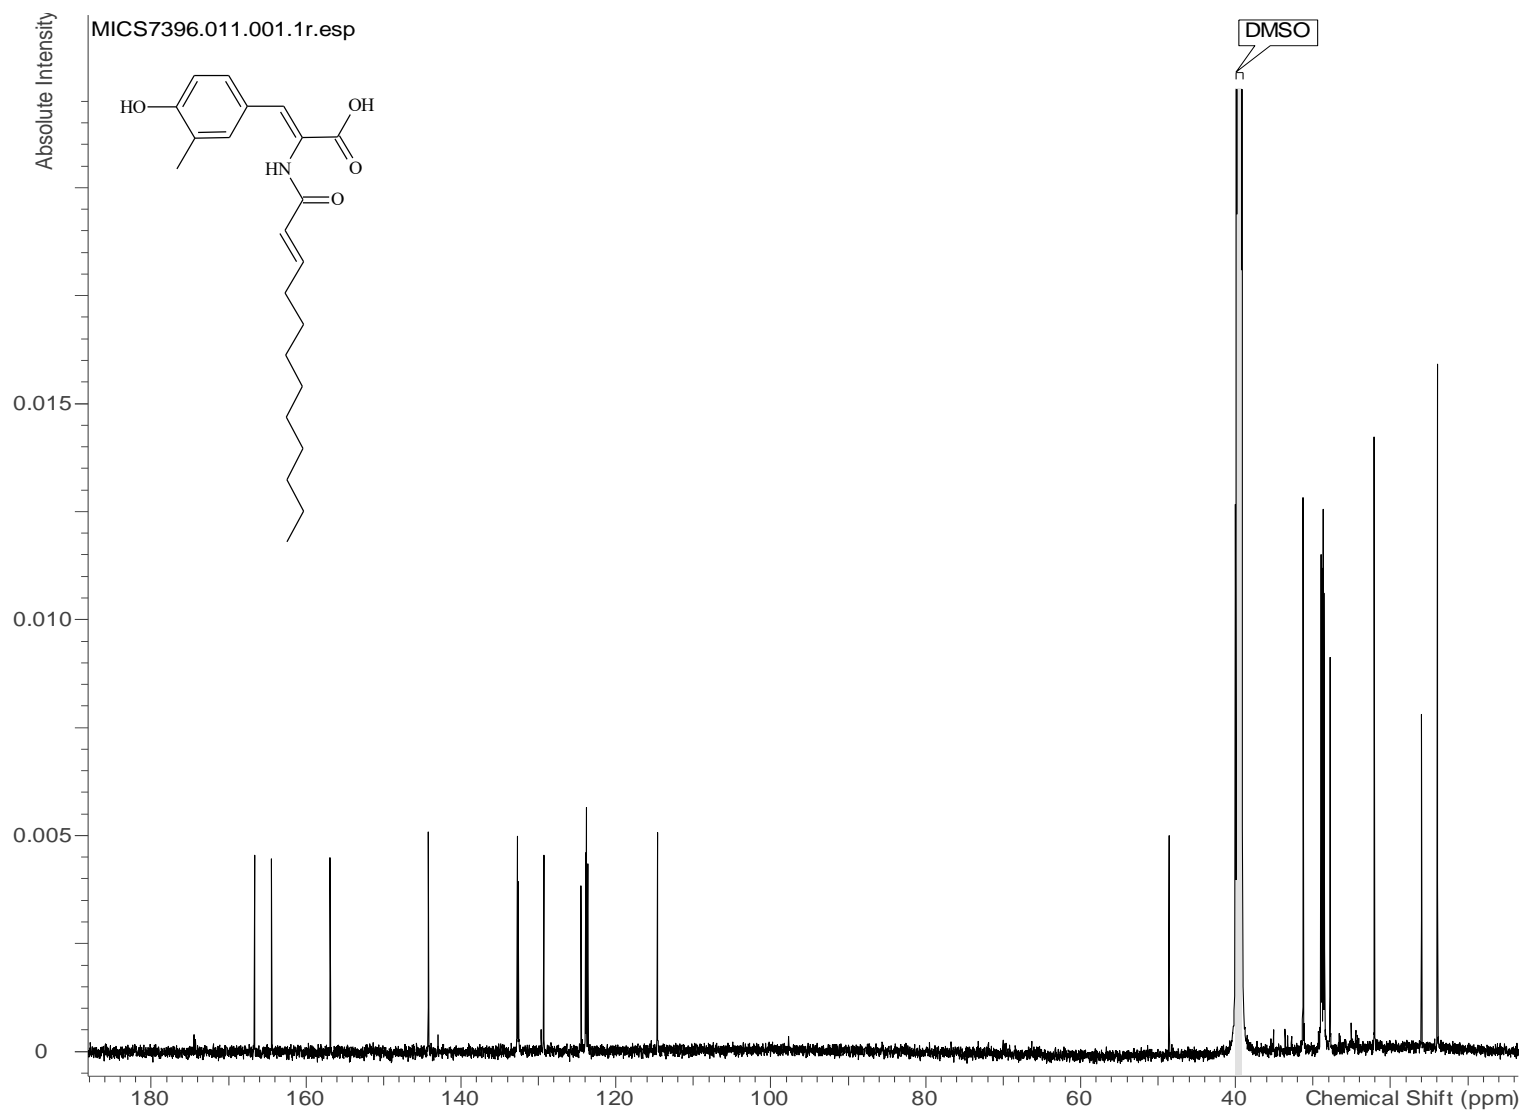

Supplementary Fig. 12. COSY NMR spectrum (700 MHz, DMSO-*d*<sub>6</sub>) of stieleriacine A<sub>1</sub> (1)

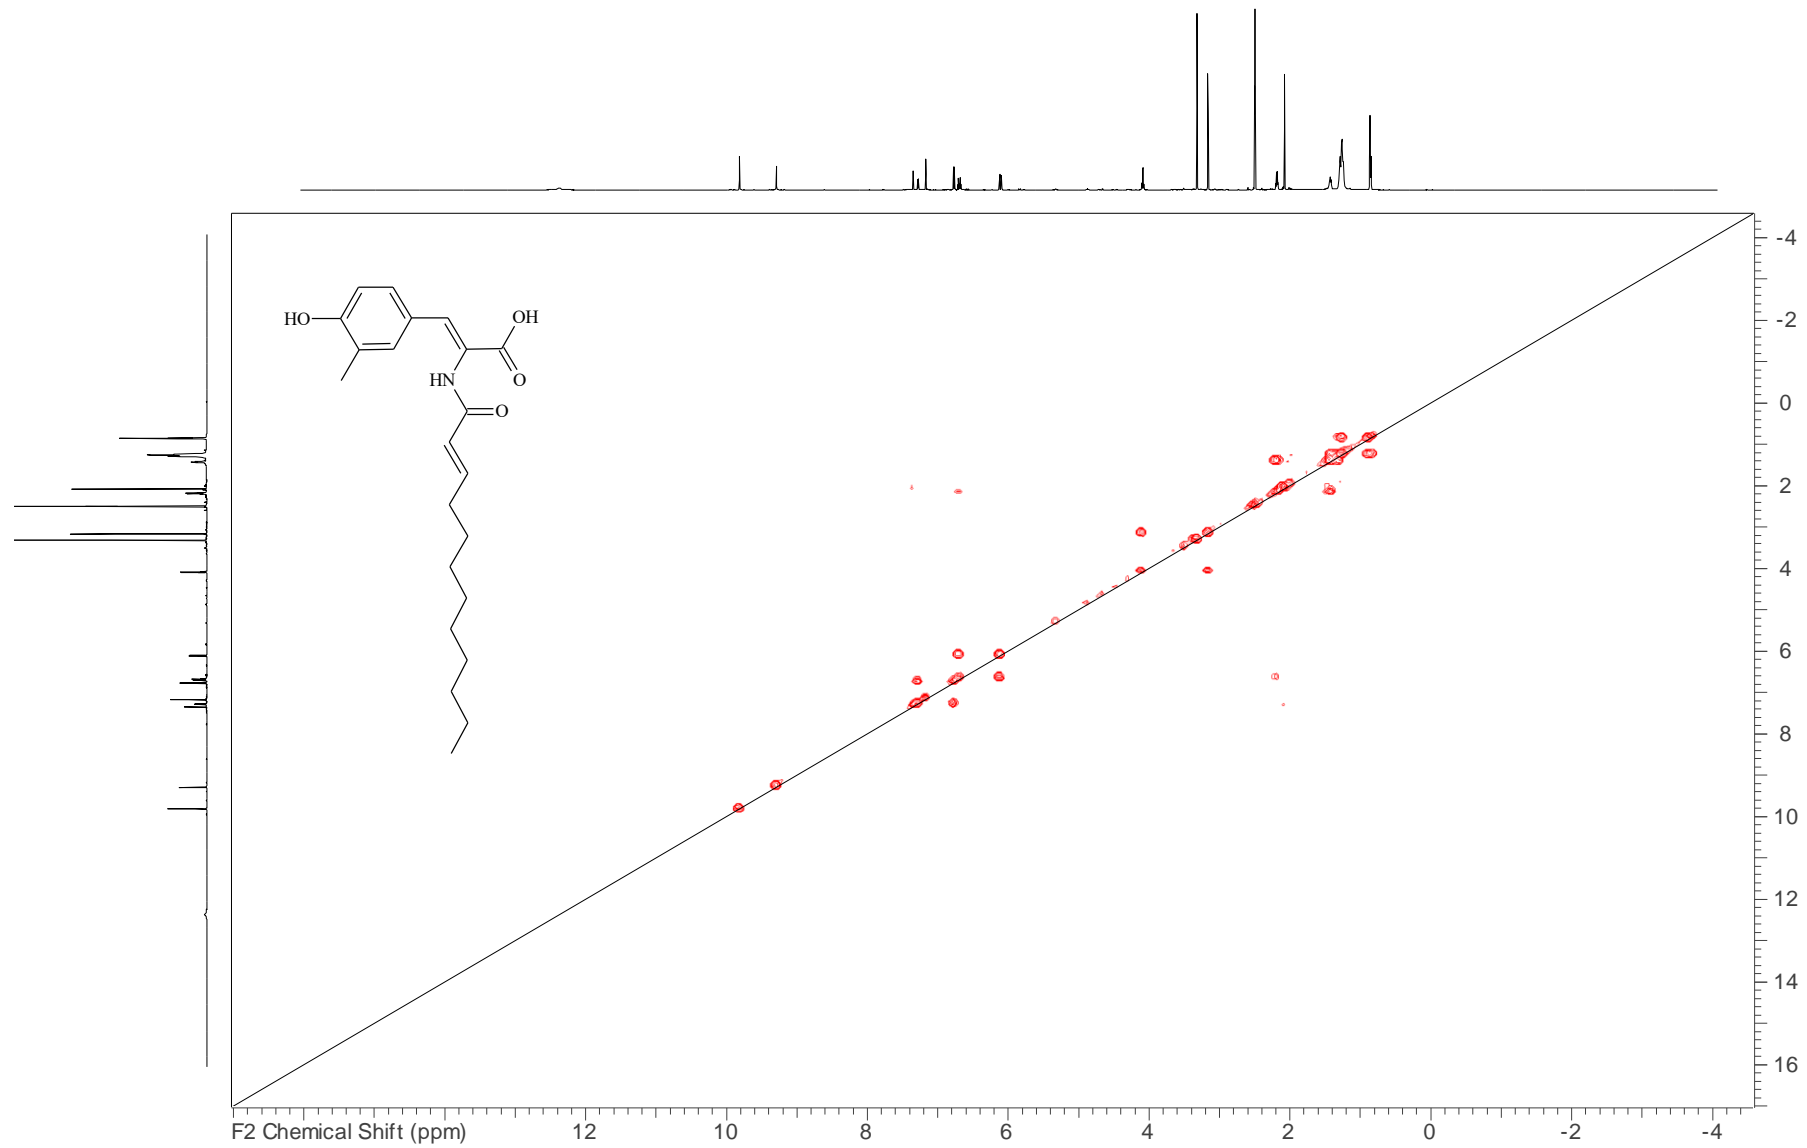

Supplementary Fig. 13. TOCSY NMR spectrum 700 MHz, DMSO-d<sub>6</sub>) of stieleriaceine A<sub>1</sub> (1)

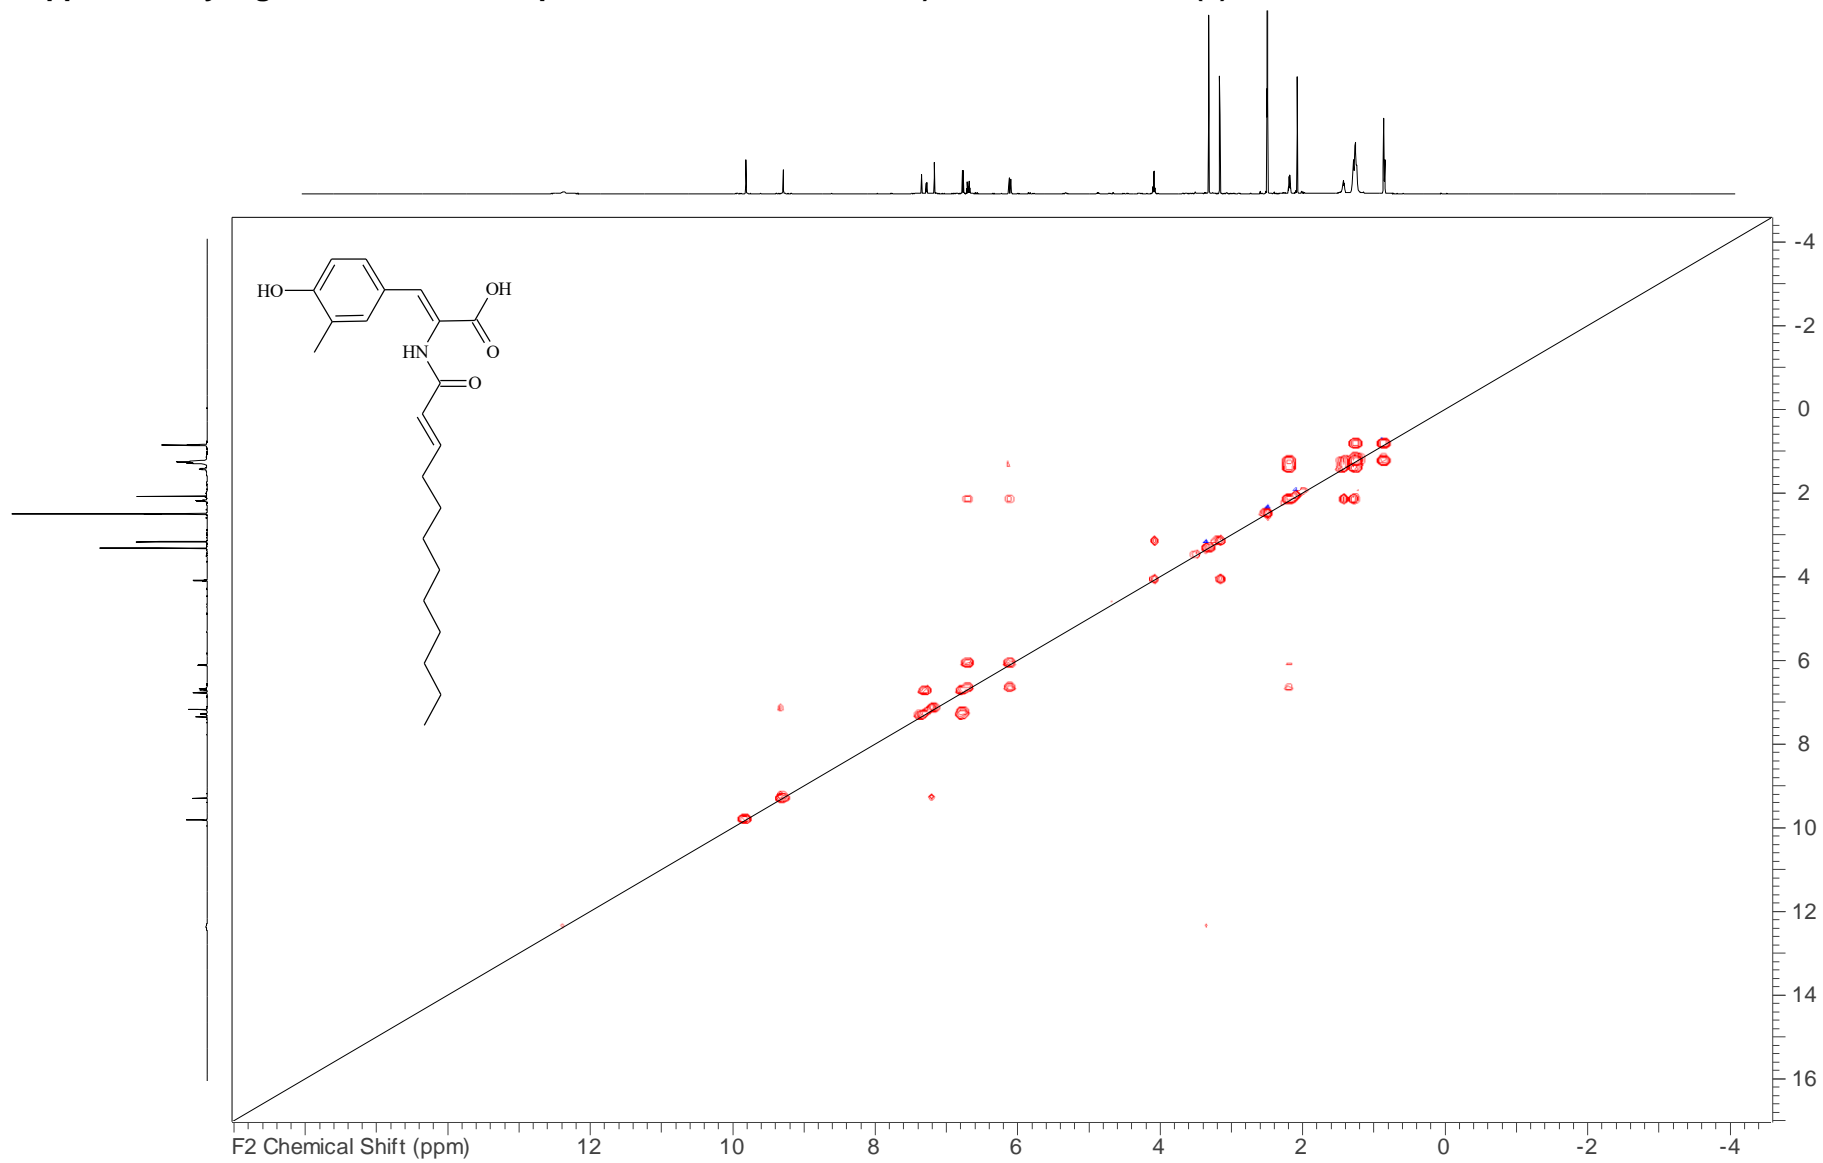

Supplementary Fig. 14. HSQC NMR spectrum (700 MHz, DMSO-d<sub>6</sub>) of stielericine A<sub>1</sub> (1)

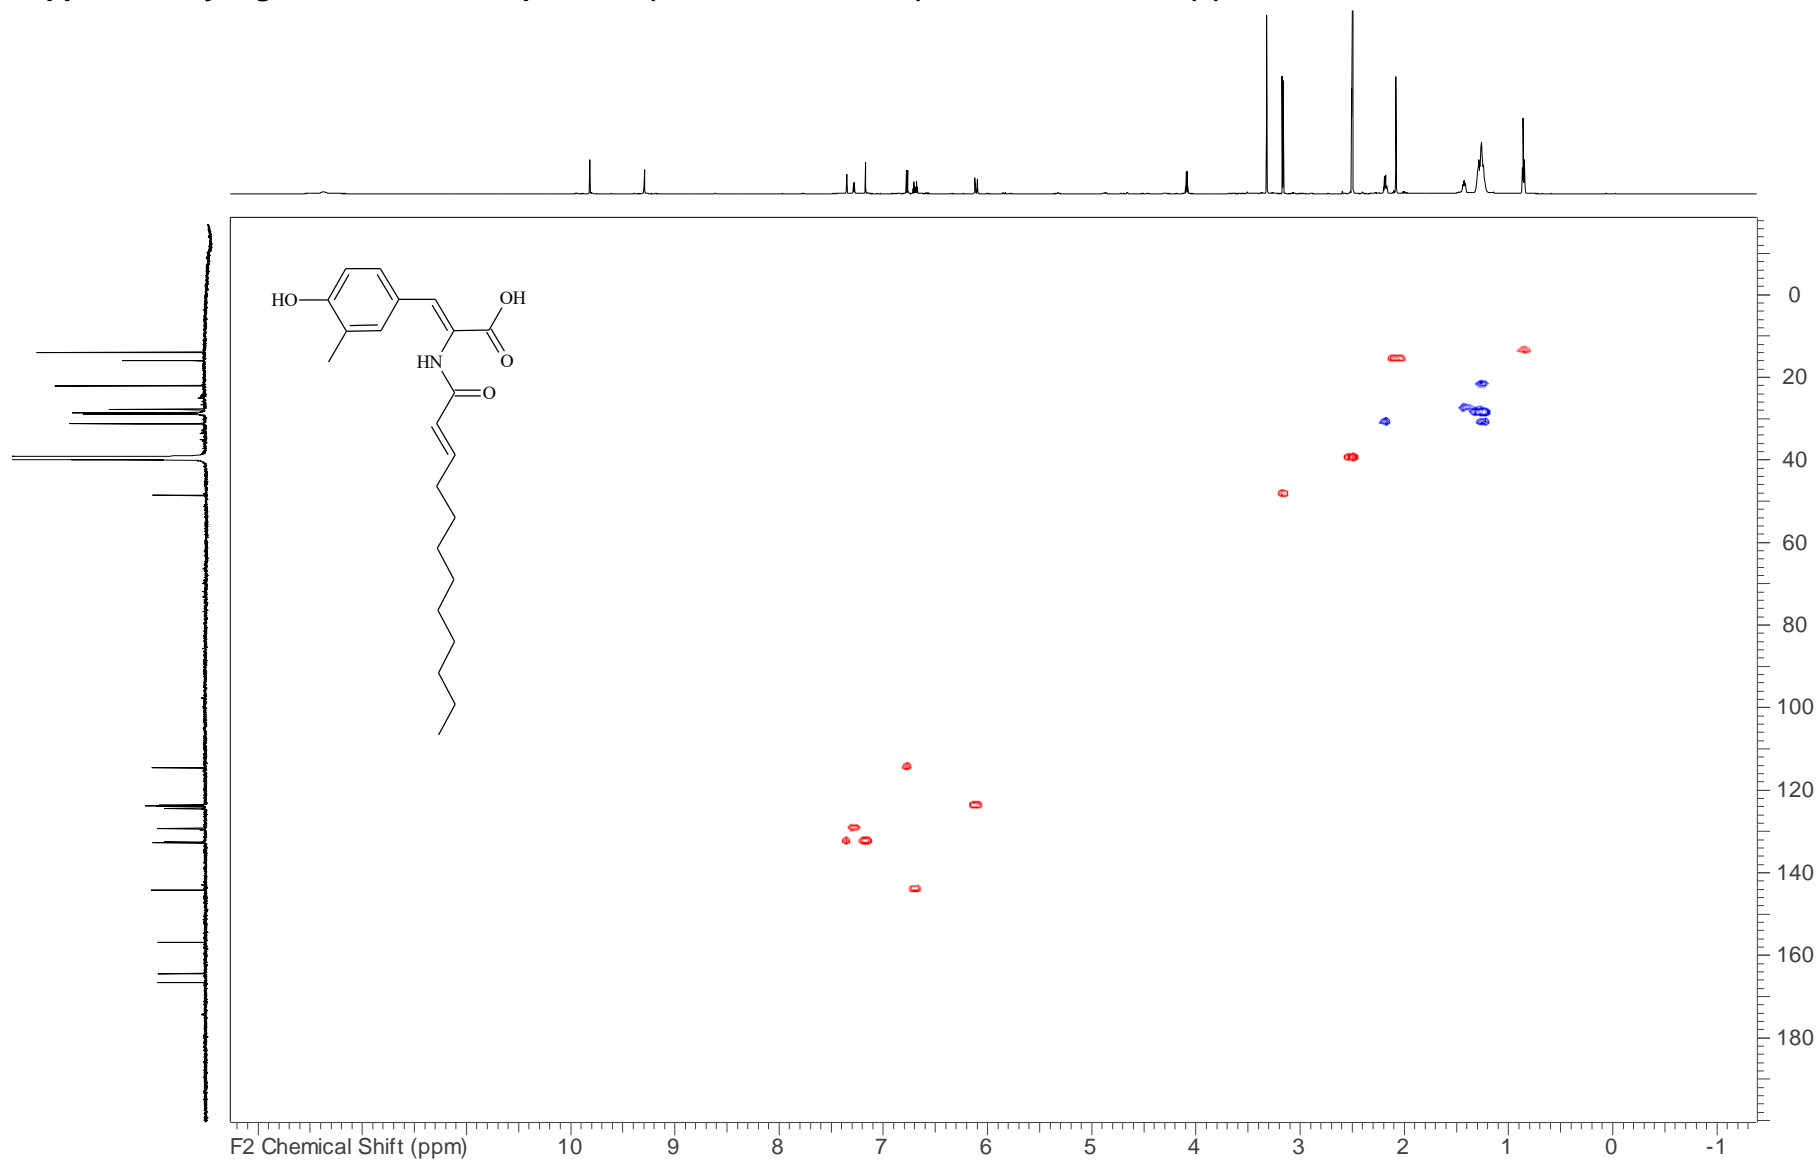

Supplementary Fig. 15. HMBC NMR spectrum (700 MHz, DMSO-d<sub>6</sub>) of stielericine A<sub>1</sub> (1)

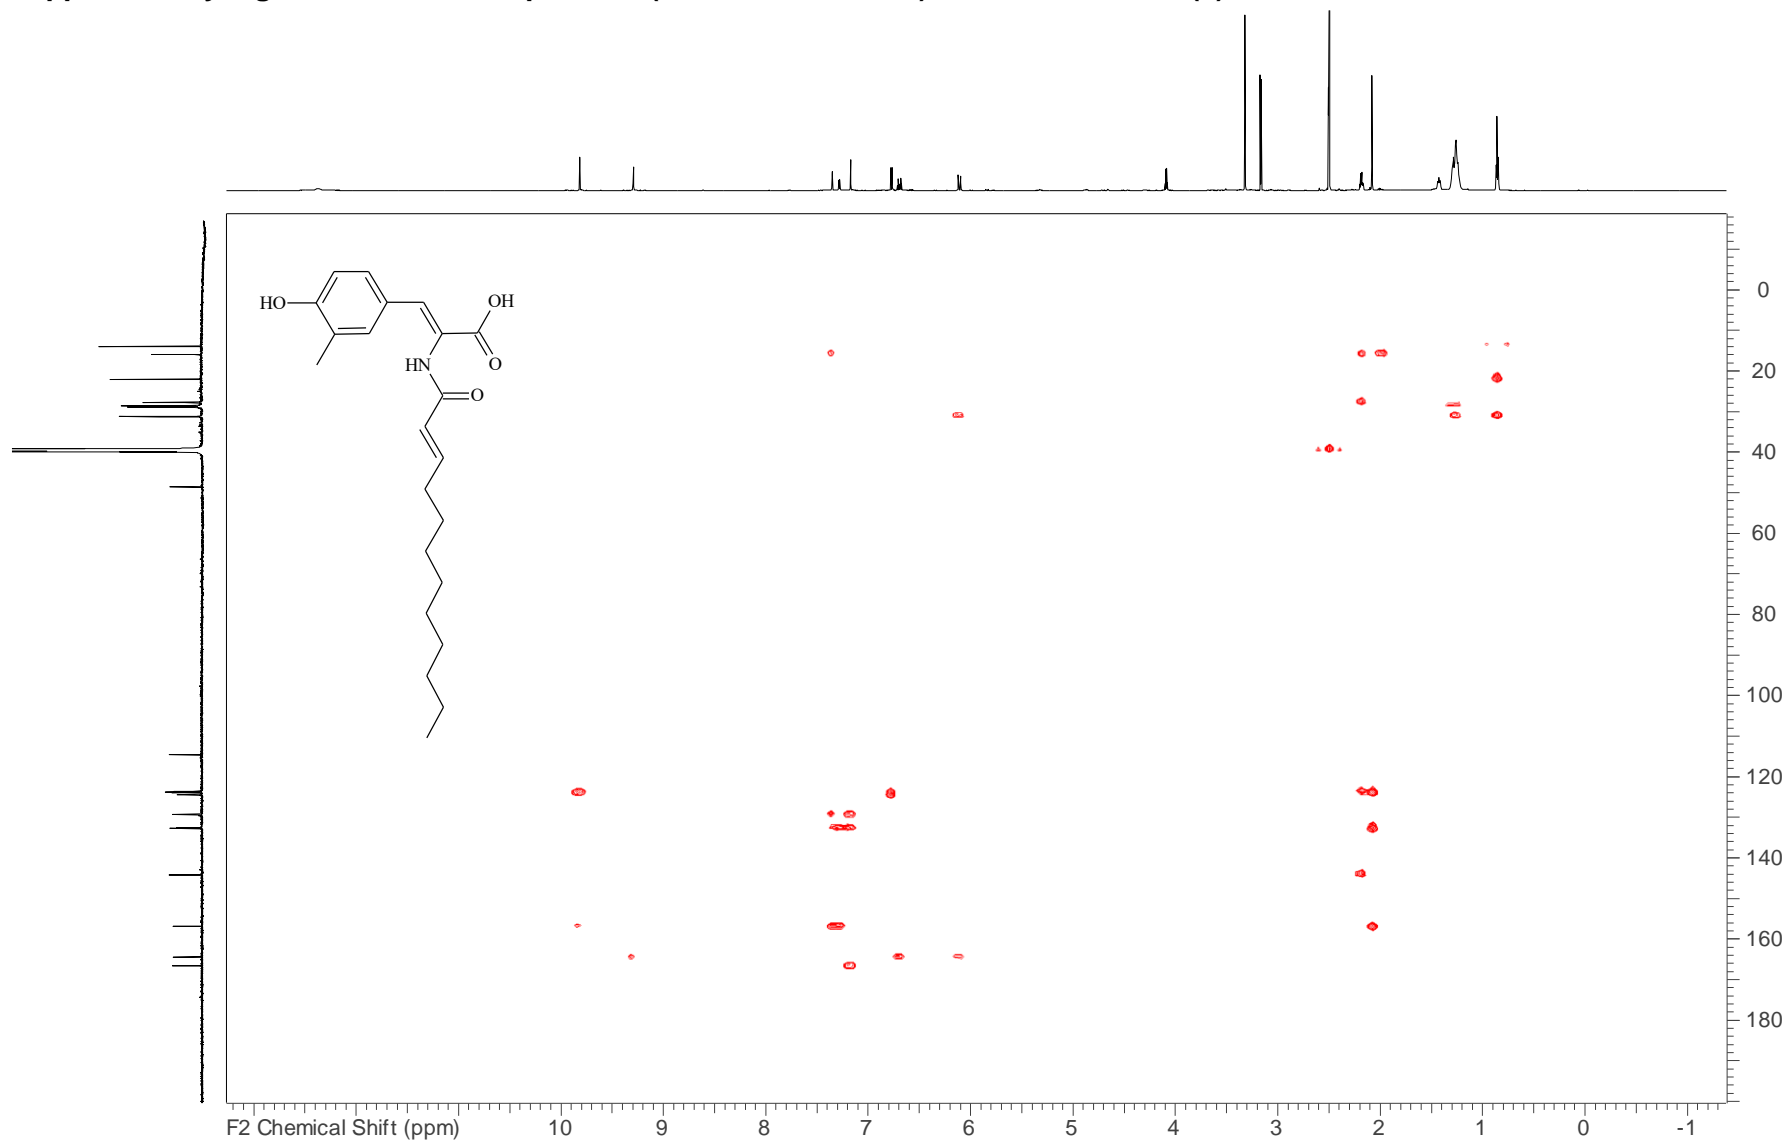

Supplementary Fig. 16. ROESY NMR spectrum (700 MHz, DMSO-d<sub>6</sub>) of stielericine A<sub>1</sub> (1)

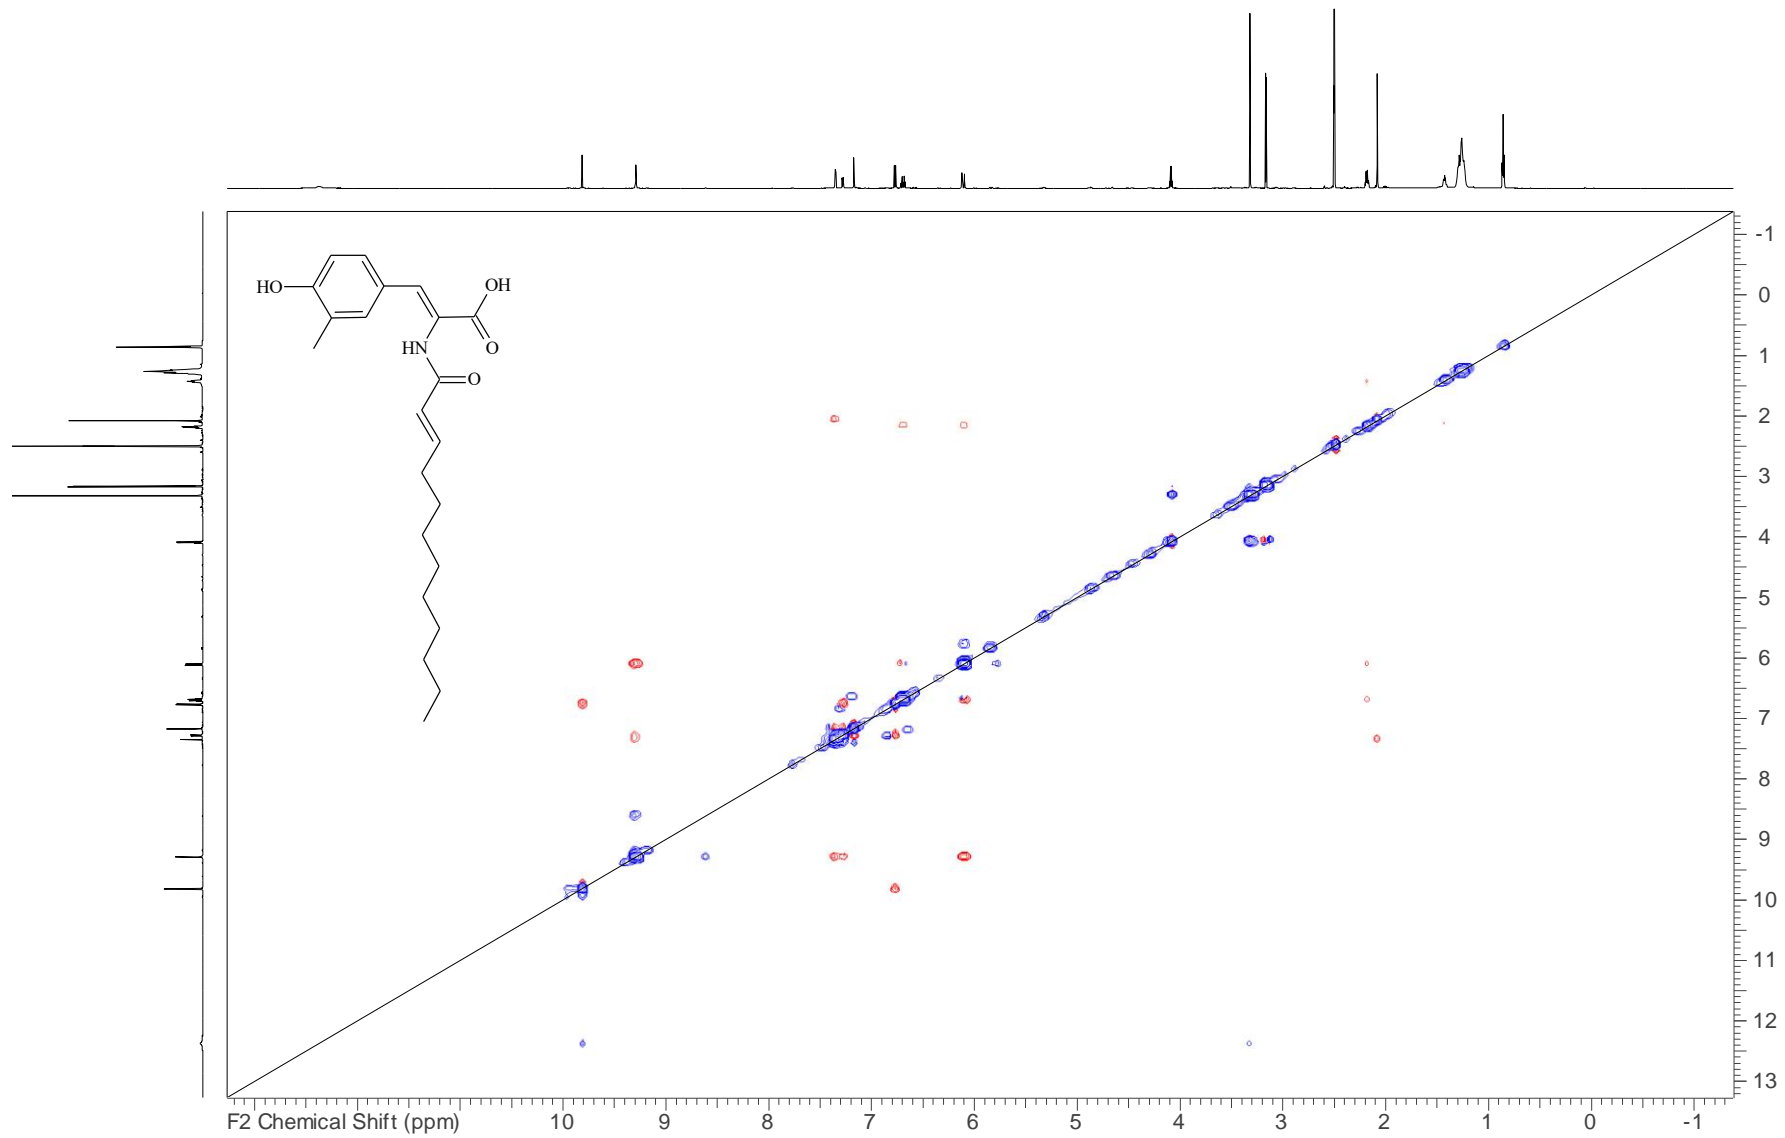



Supplementary Fig. 17. HRESIMS of stieleriace B<sub>1</sub> (2)

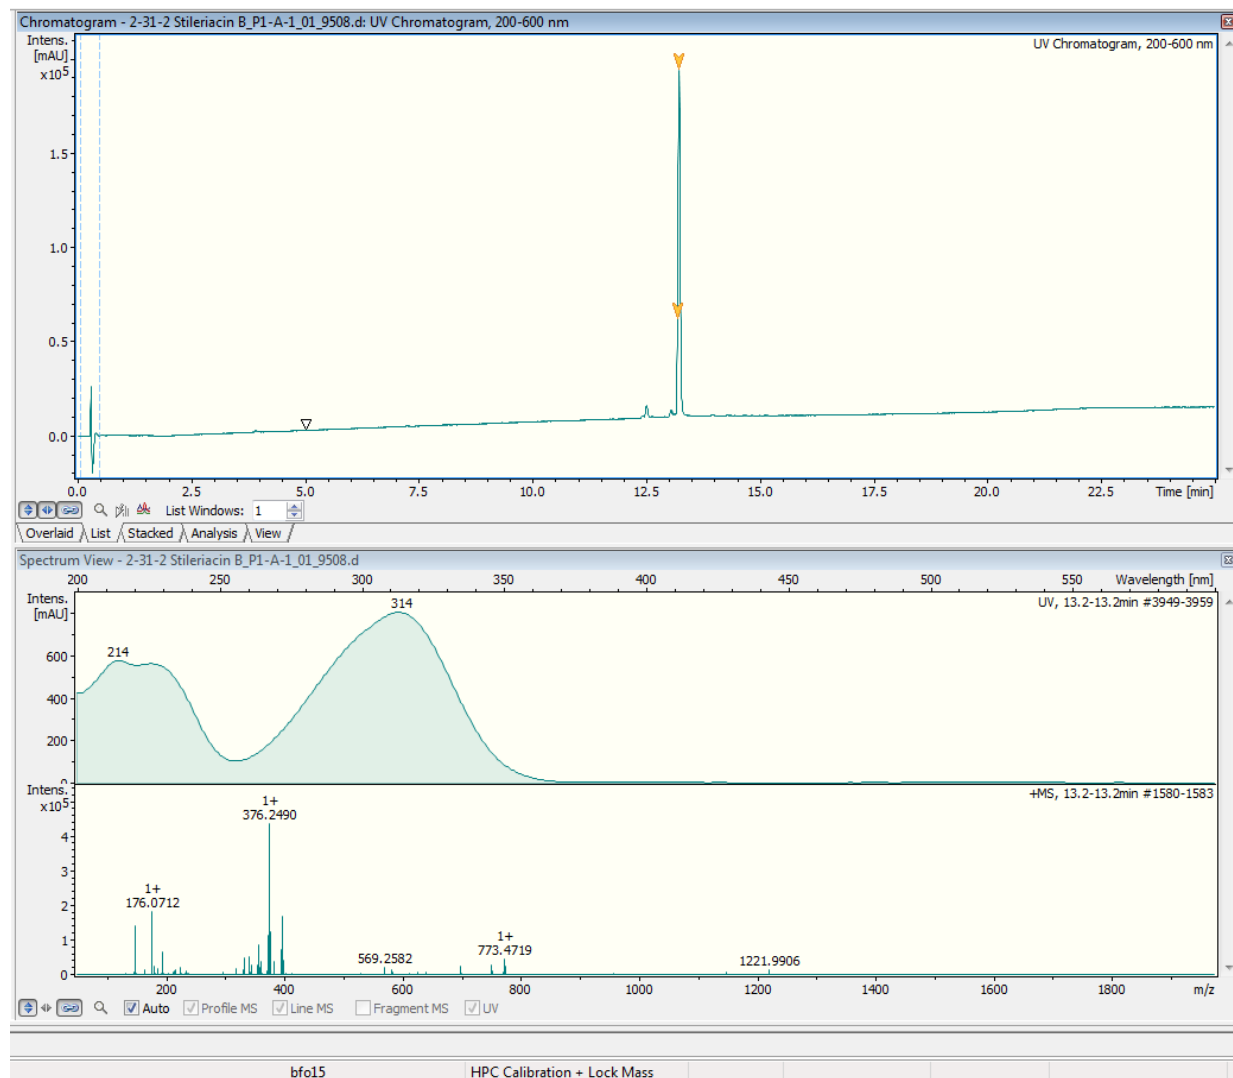

Supplementary Fig. 18. <sup>1</sup>H NMR spectrum (500 MHz, DMSO-d<sub>6</sub>) of stieleriace B<sub>1</sub> (2)

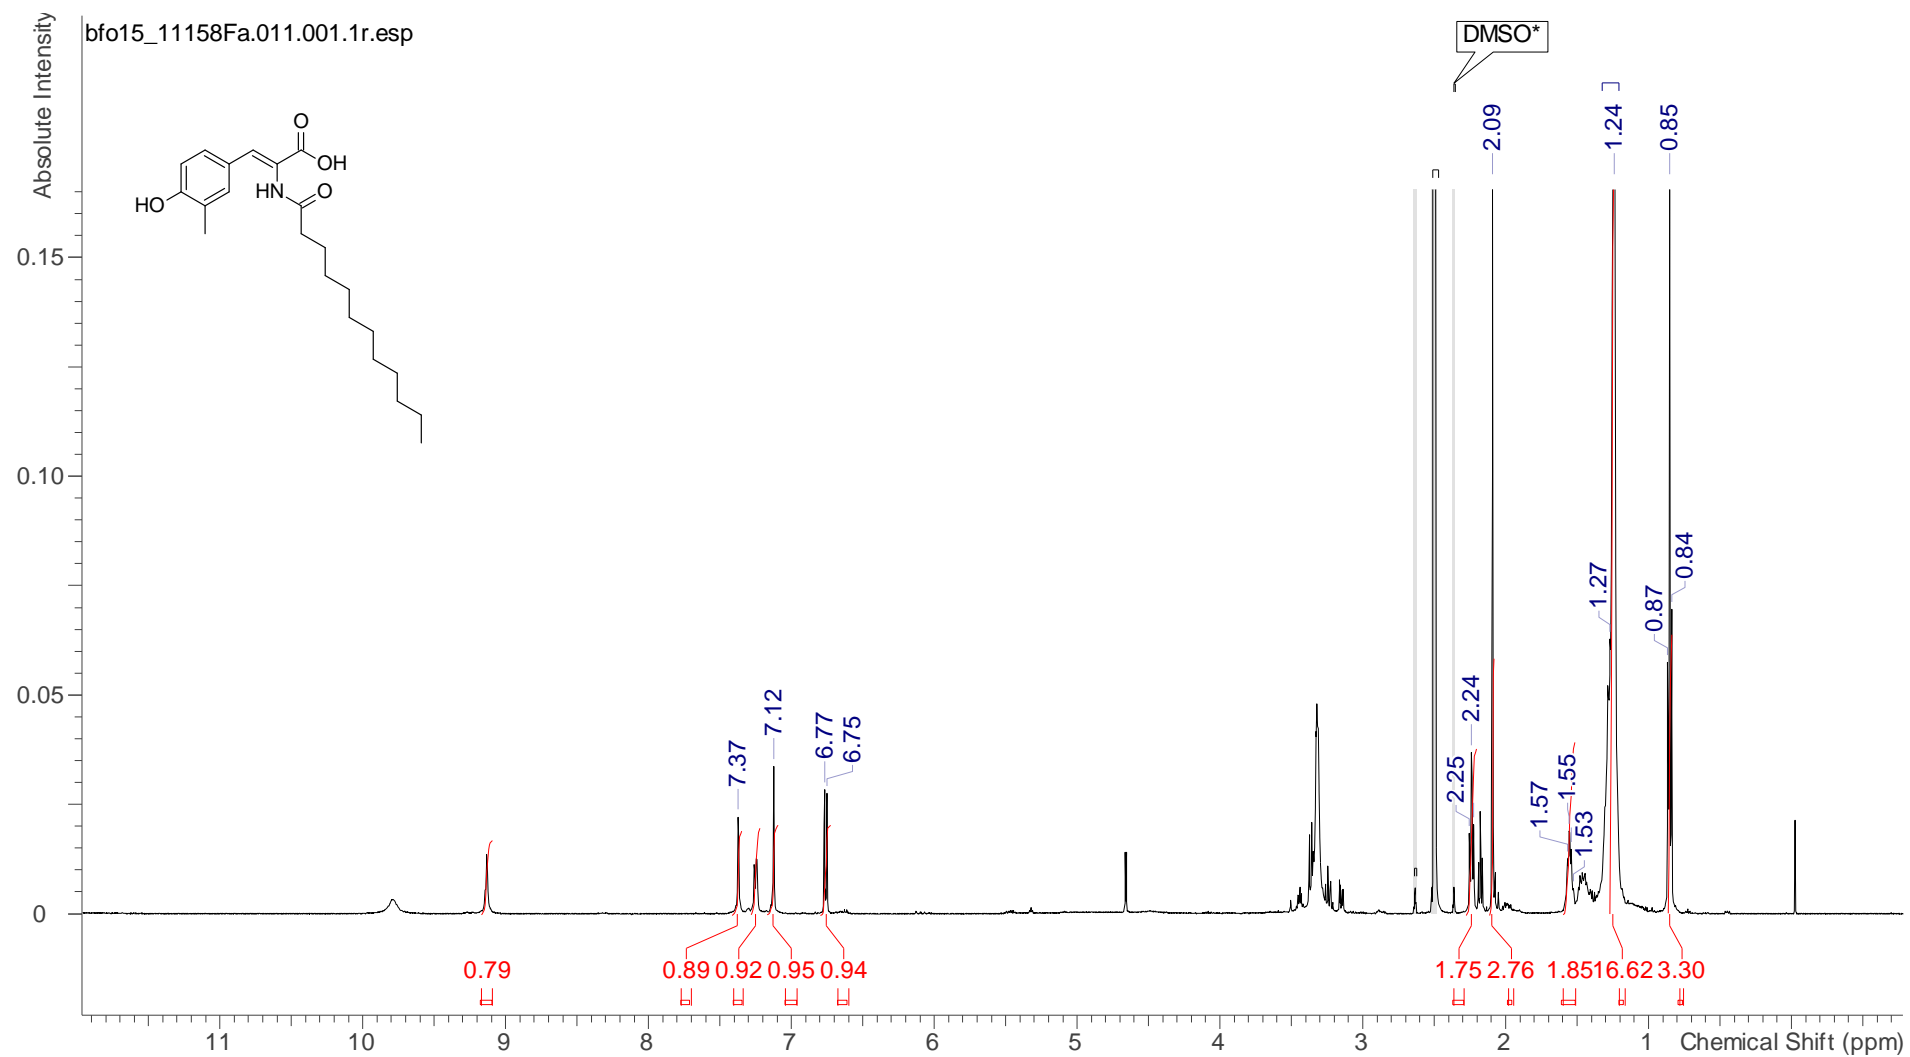

Supplementary Fig. 19.  $^{13}\text{C}$  NMR spectrum (126 MHz,  $\text{DMSO-d}_6$ ) of stieleriicine B<sub>1</sub> (2)

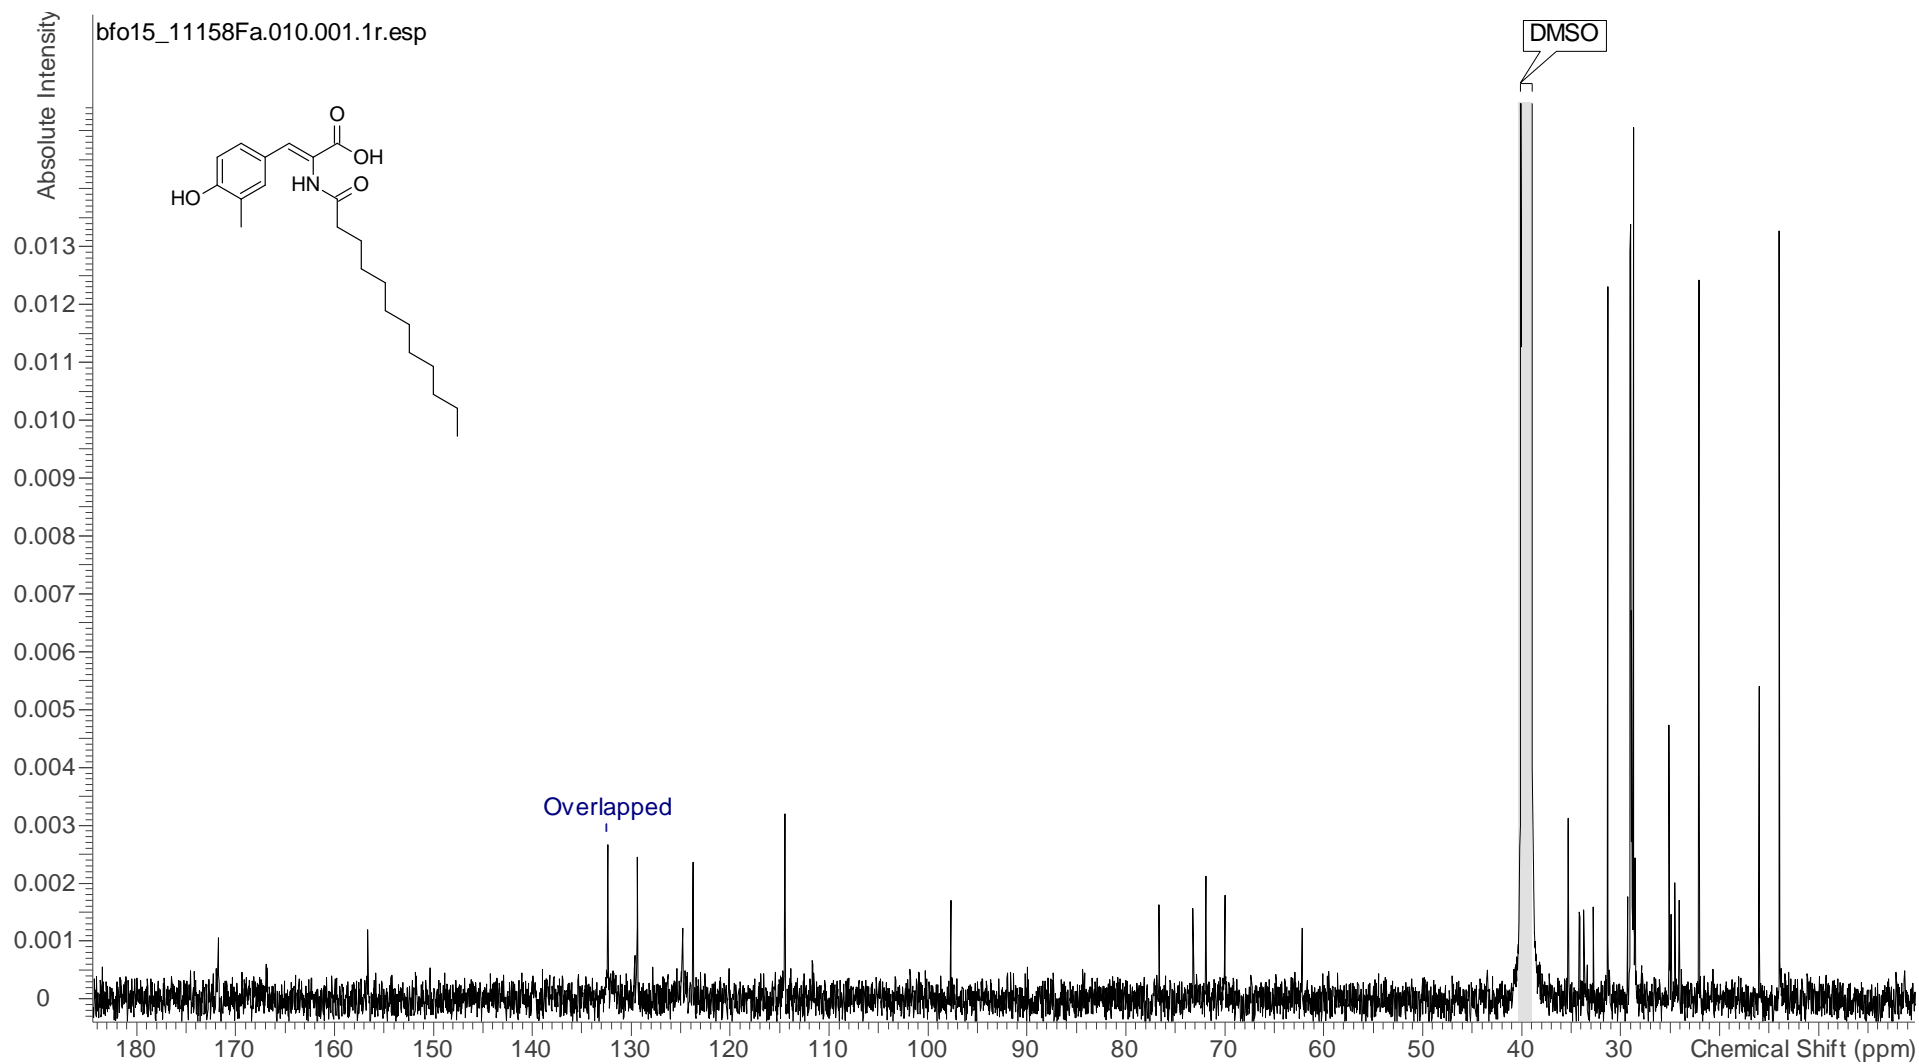

Supplementary Fig. 20. HSQC NMR spectrum (500 MHz, DMSO-*d*<sub>6</sub>) of stieleriaceine B<sub>1</sub> (2)

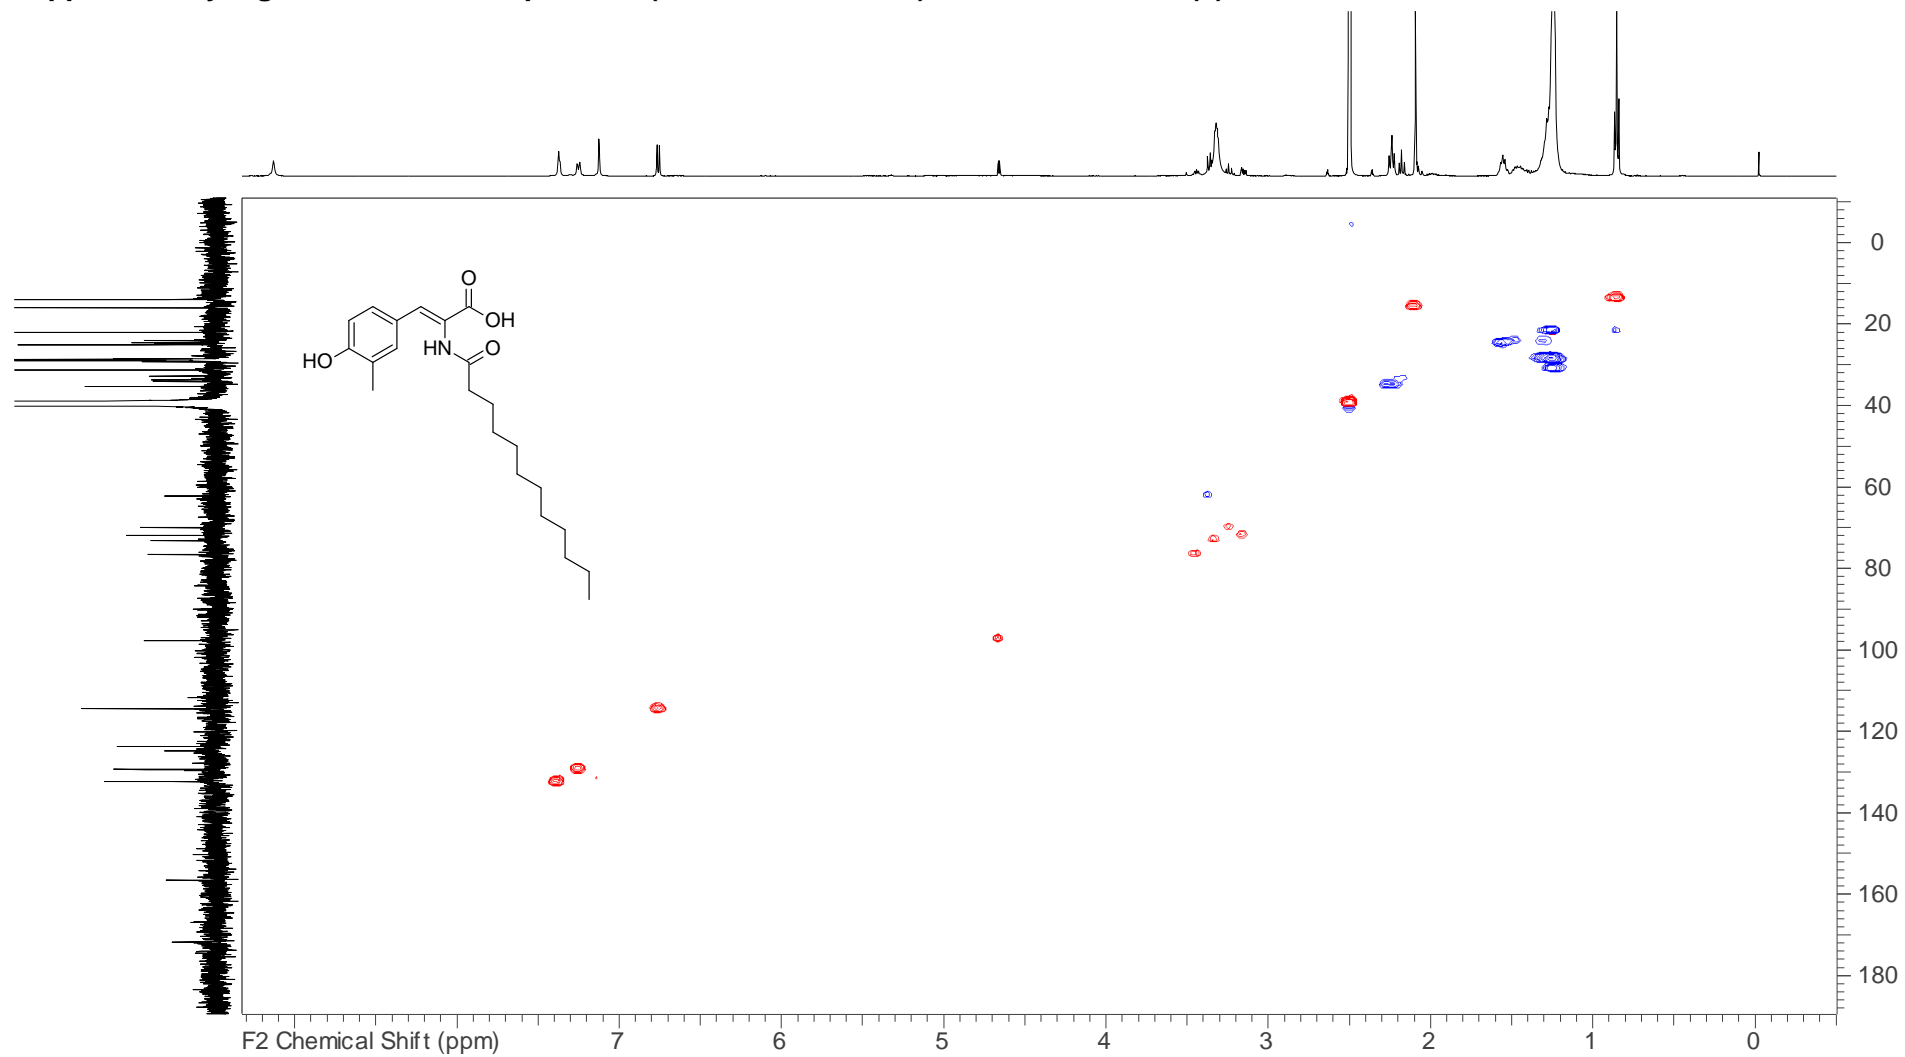

Supplementary Fig. 21. HMBC NMR spectrum (500 MHz, DMSO- $d_6$ ) of stieleriaceine B<sub>1</sub> (2)

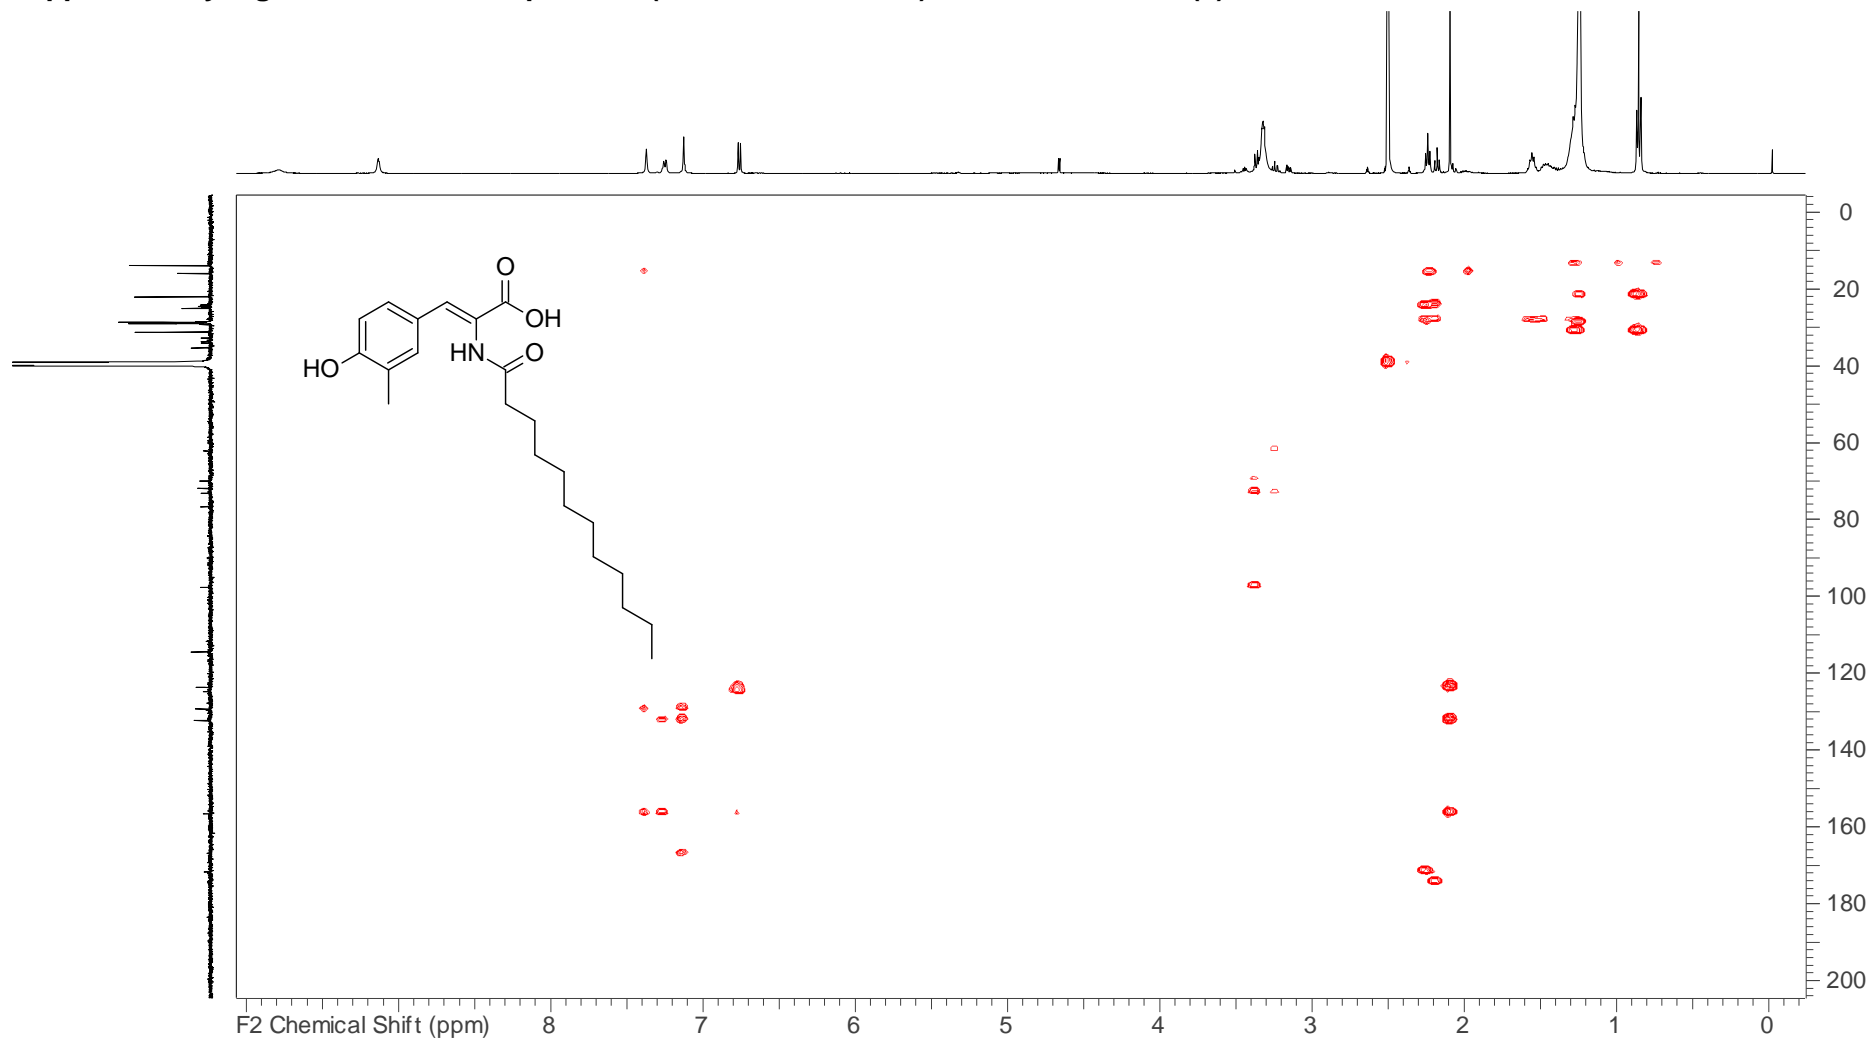

Supplementary Fig. 22. COSY NMR spectrum (500 MHz, DMSO-*d*<sub>6</sub>) of stieleriace B<sub>1</sub> (2)

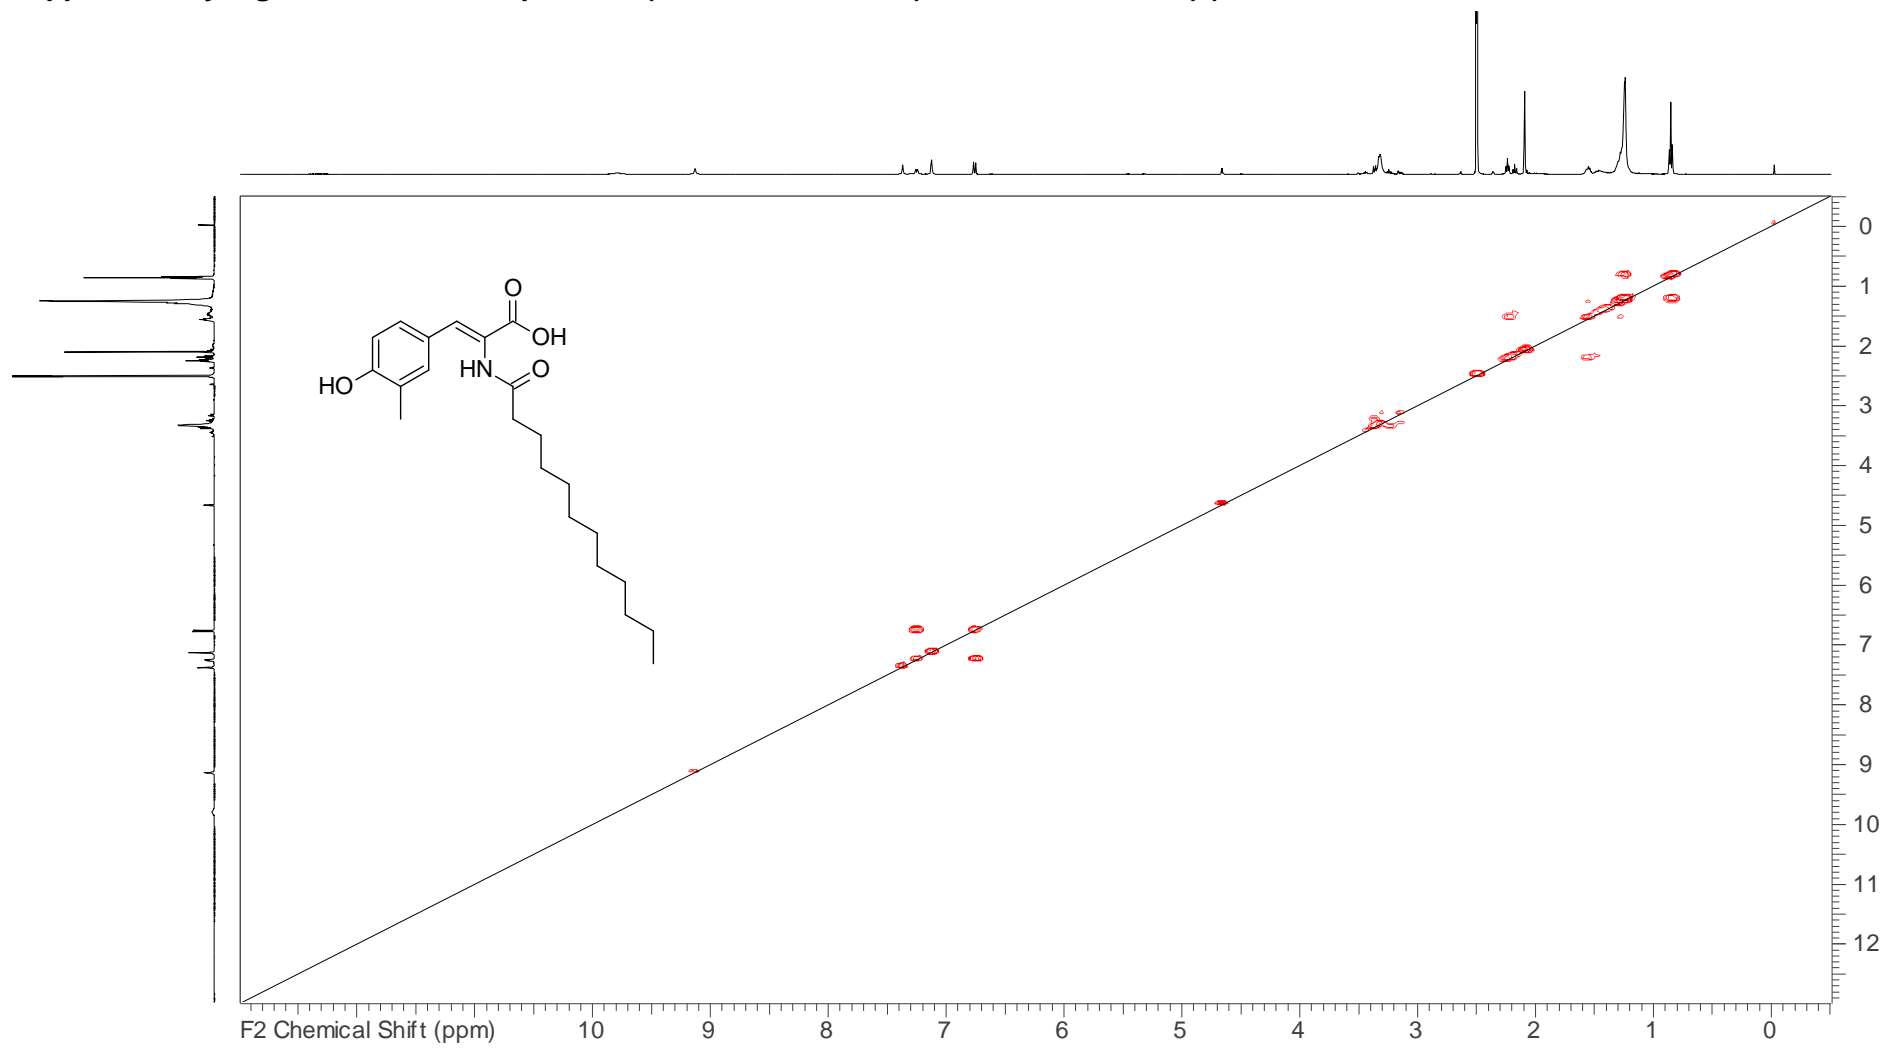

Supplementary Fig. 23. TOCSY NMR spectrum (500 MHz, DMSO-*d*<sub>6</sub>) of stieleriaceine B<sub>1</sub> (2)

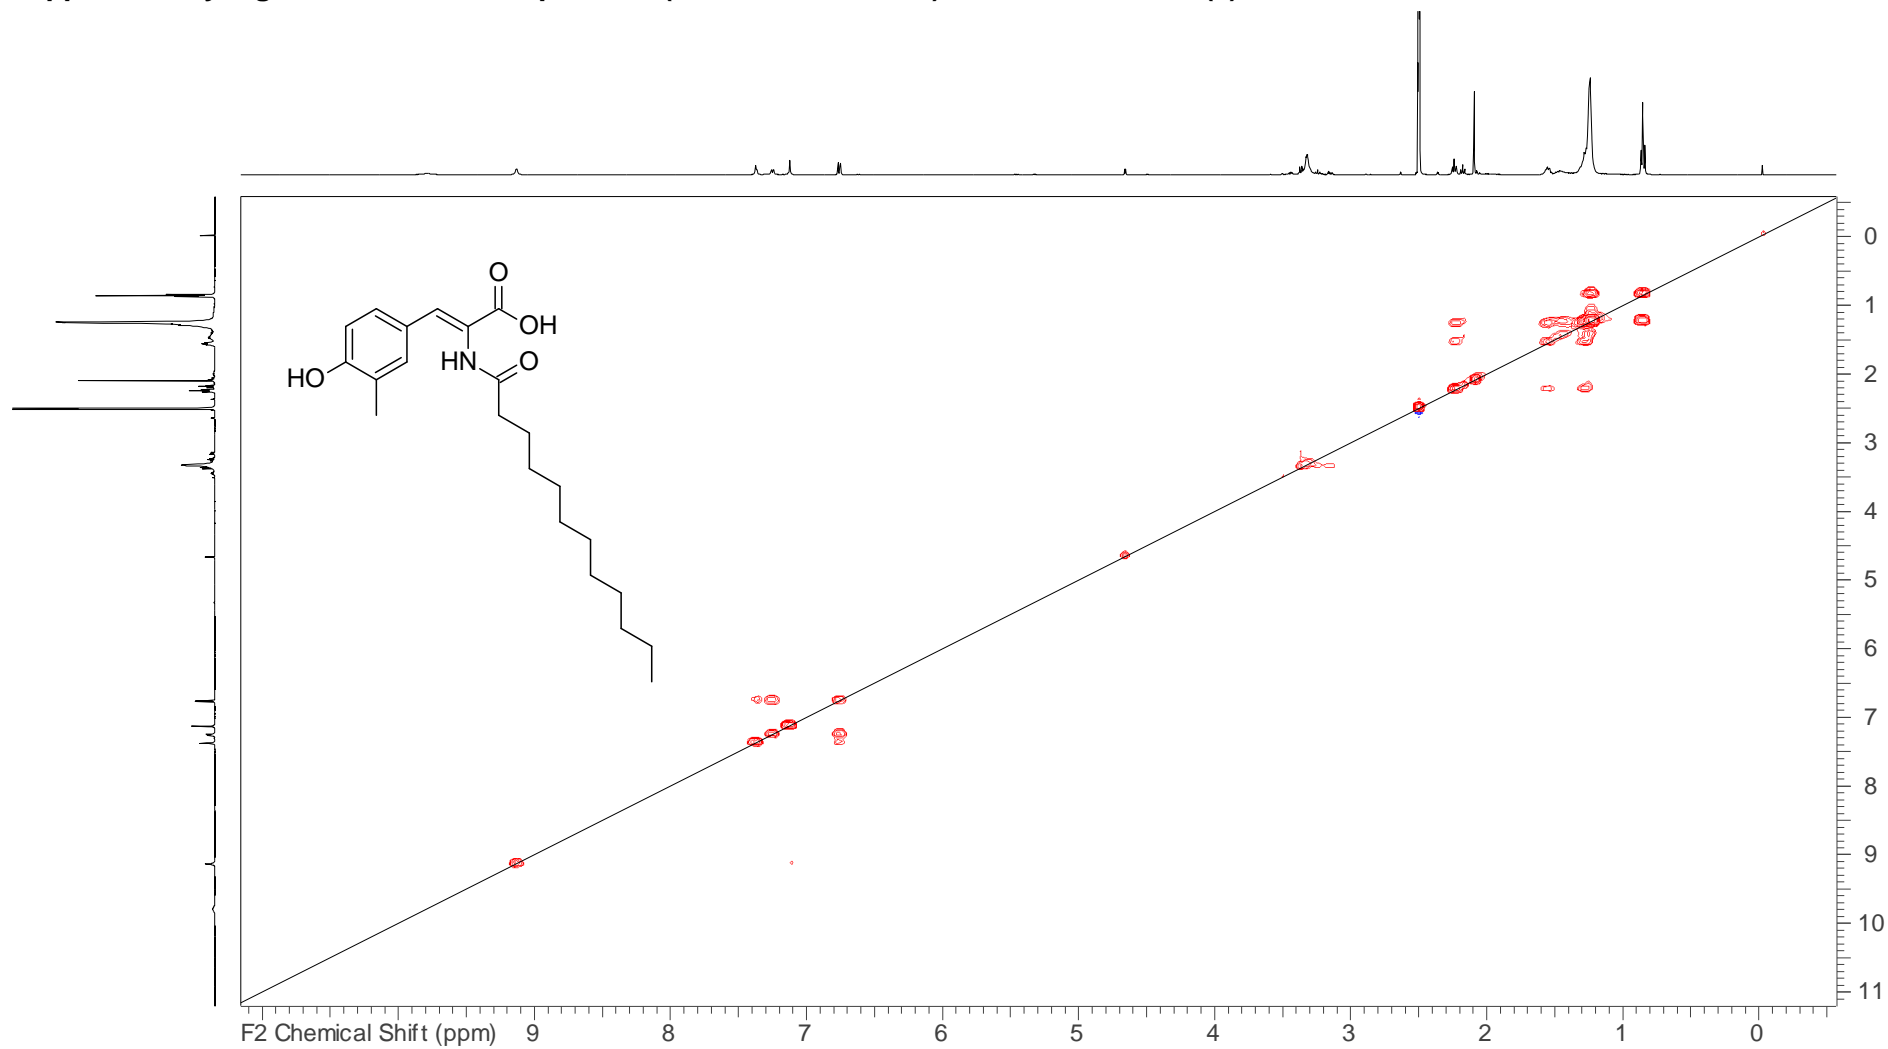

Supplementary Fig. 24. ROESY NMR spectrum (500 MHz, DMSO- $d_6$ ) of stielericine B<sub>1</sub> (2)

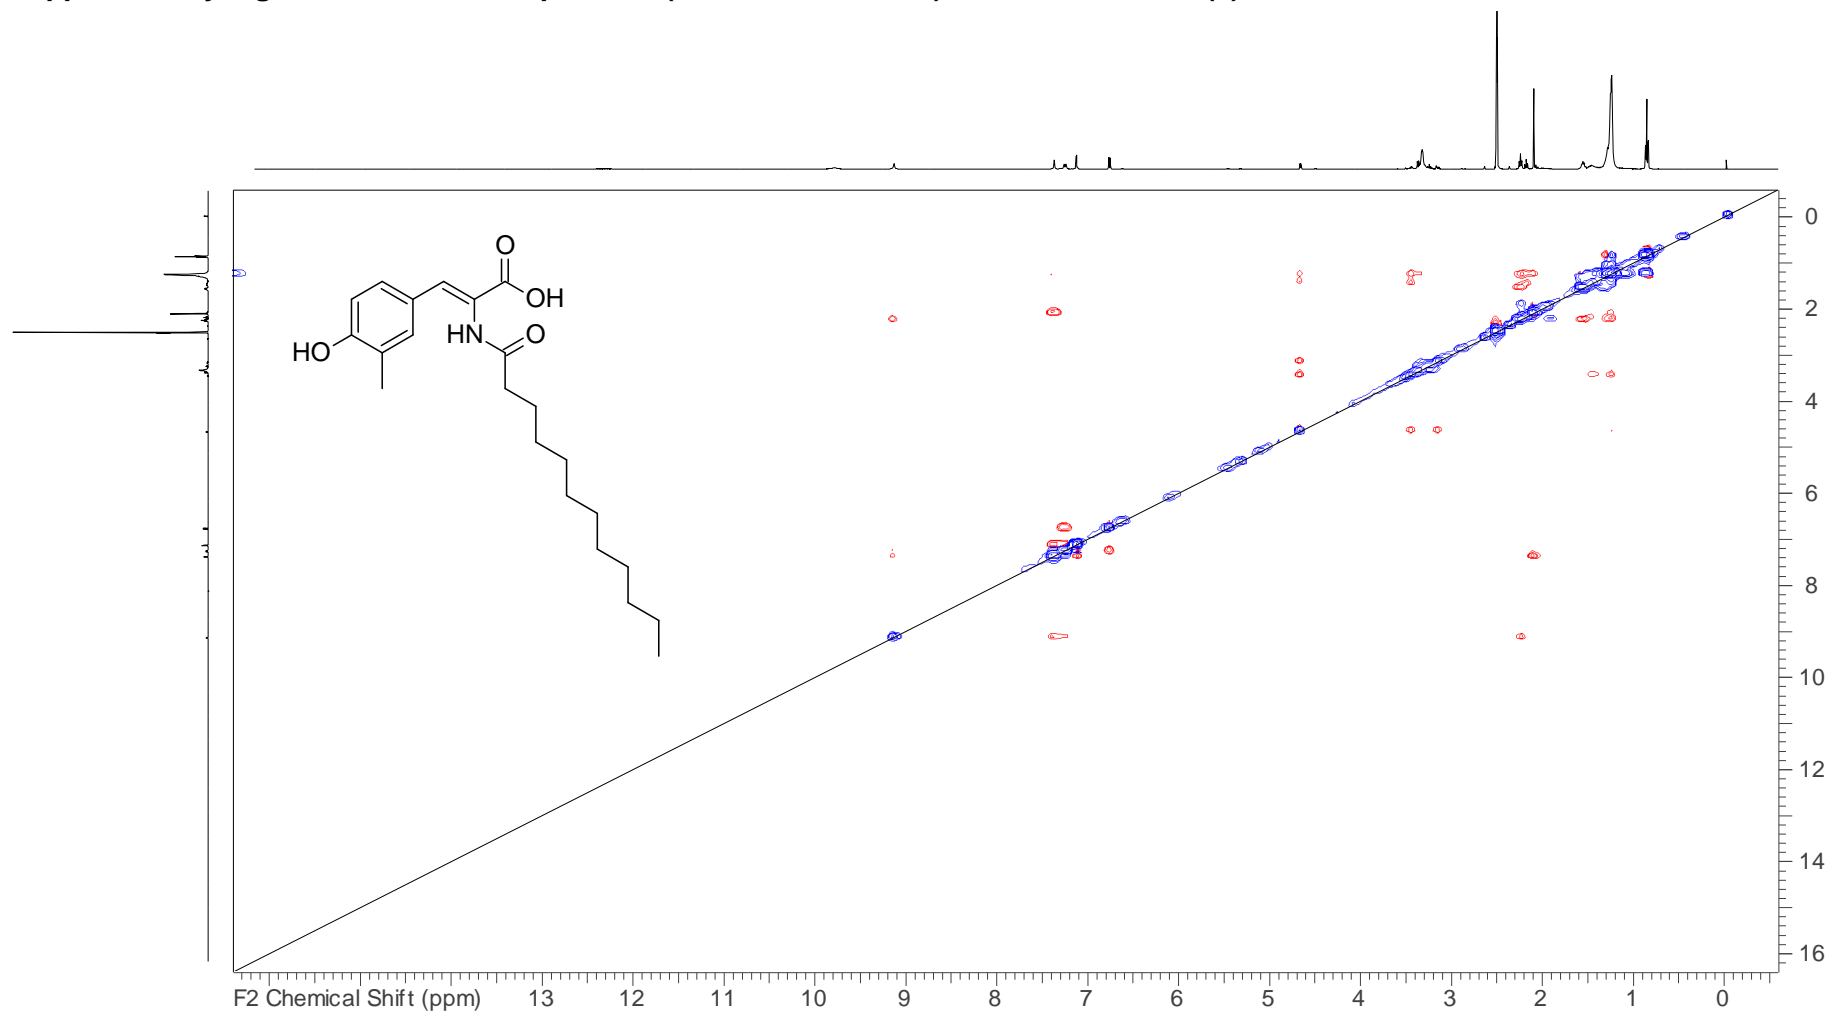



Supplementary Fig. 25. HRESIMS data of stileriicine C (3)

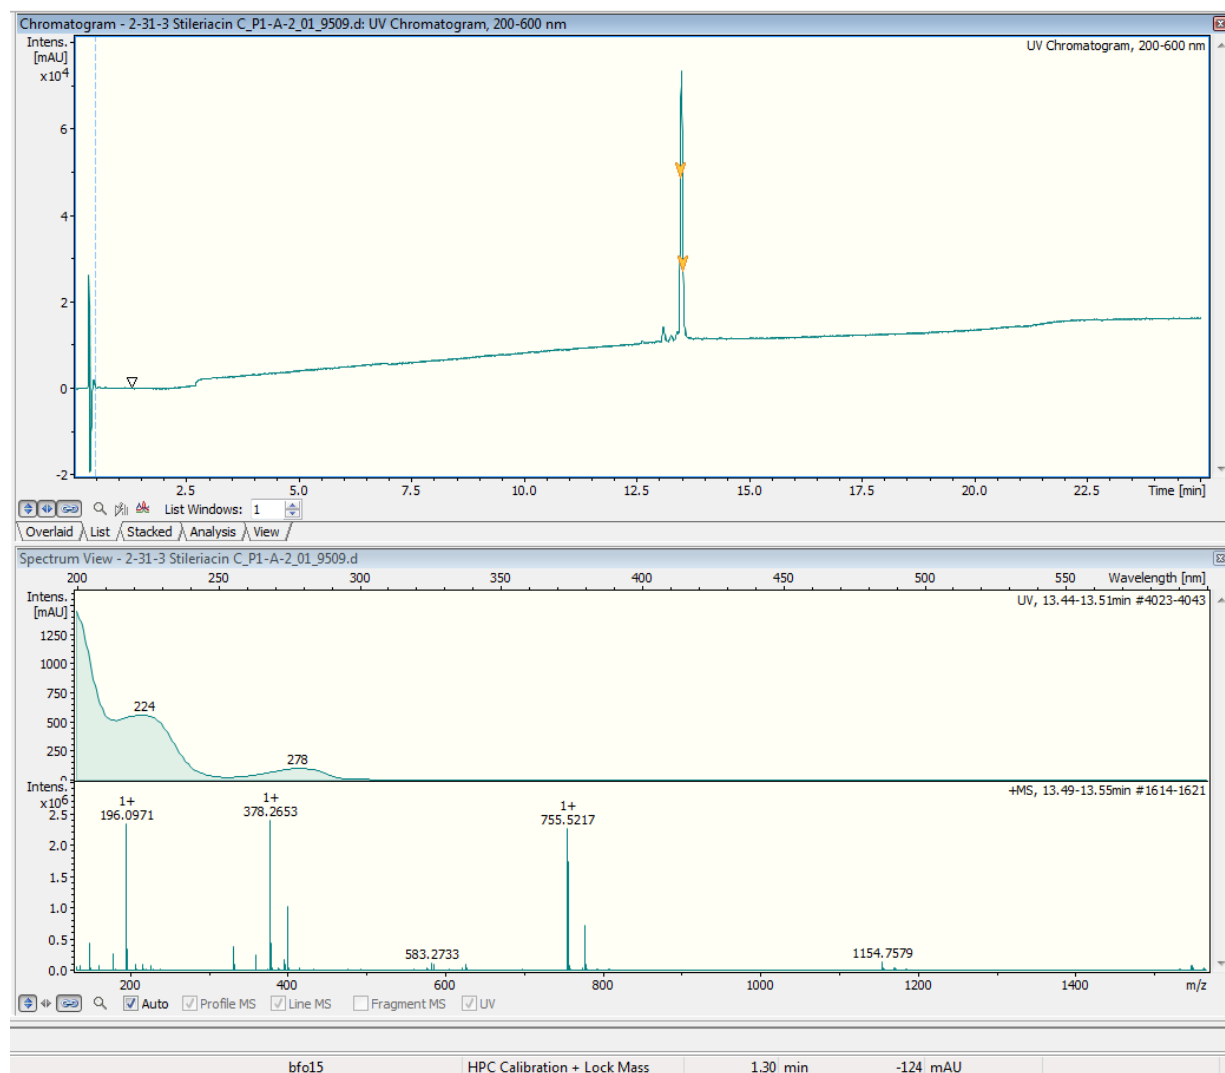

Supplementary Fig. 26. <sup>1</sup>H NMR spectrum (700 MHz, DMSO-d<sub>6</sub>) of stieleriace C (3)

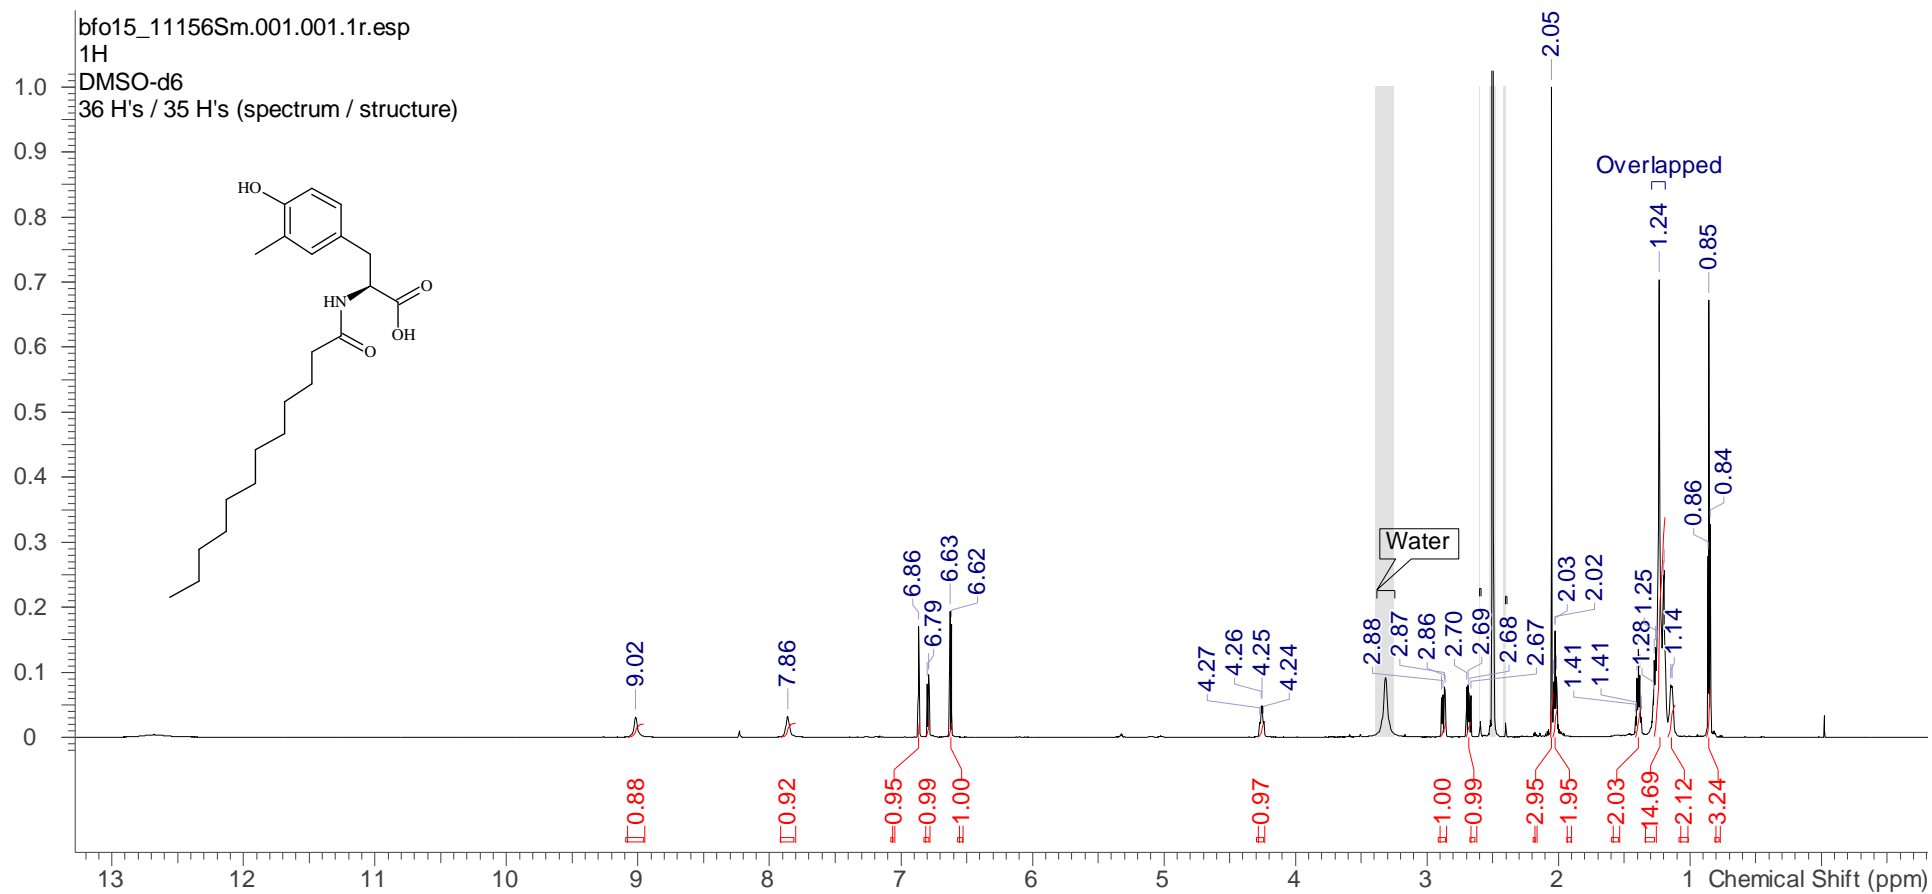

Supplementary Fig. 27.  $^{13}\text{C}$  NMR spectrum (176 MHz,  $\text{DMSO-}d_6$ ) of stieleriaccine C (3)

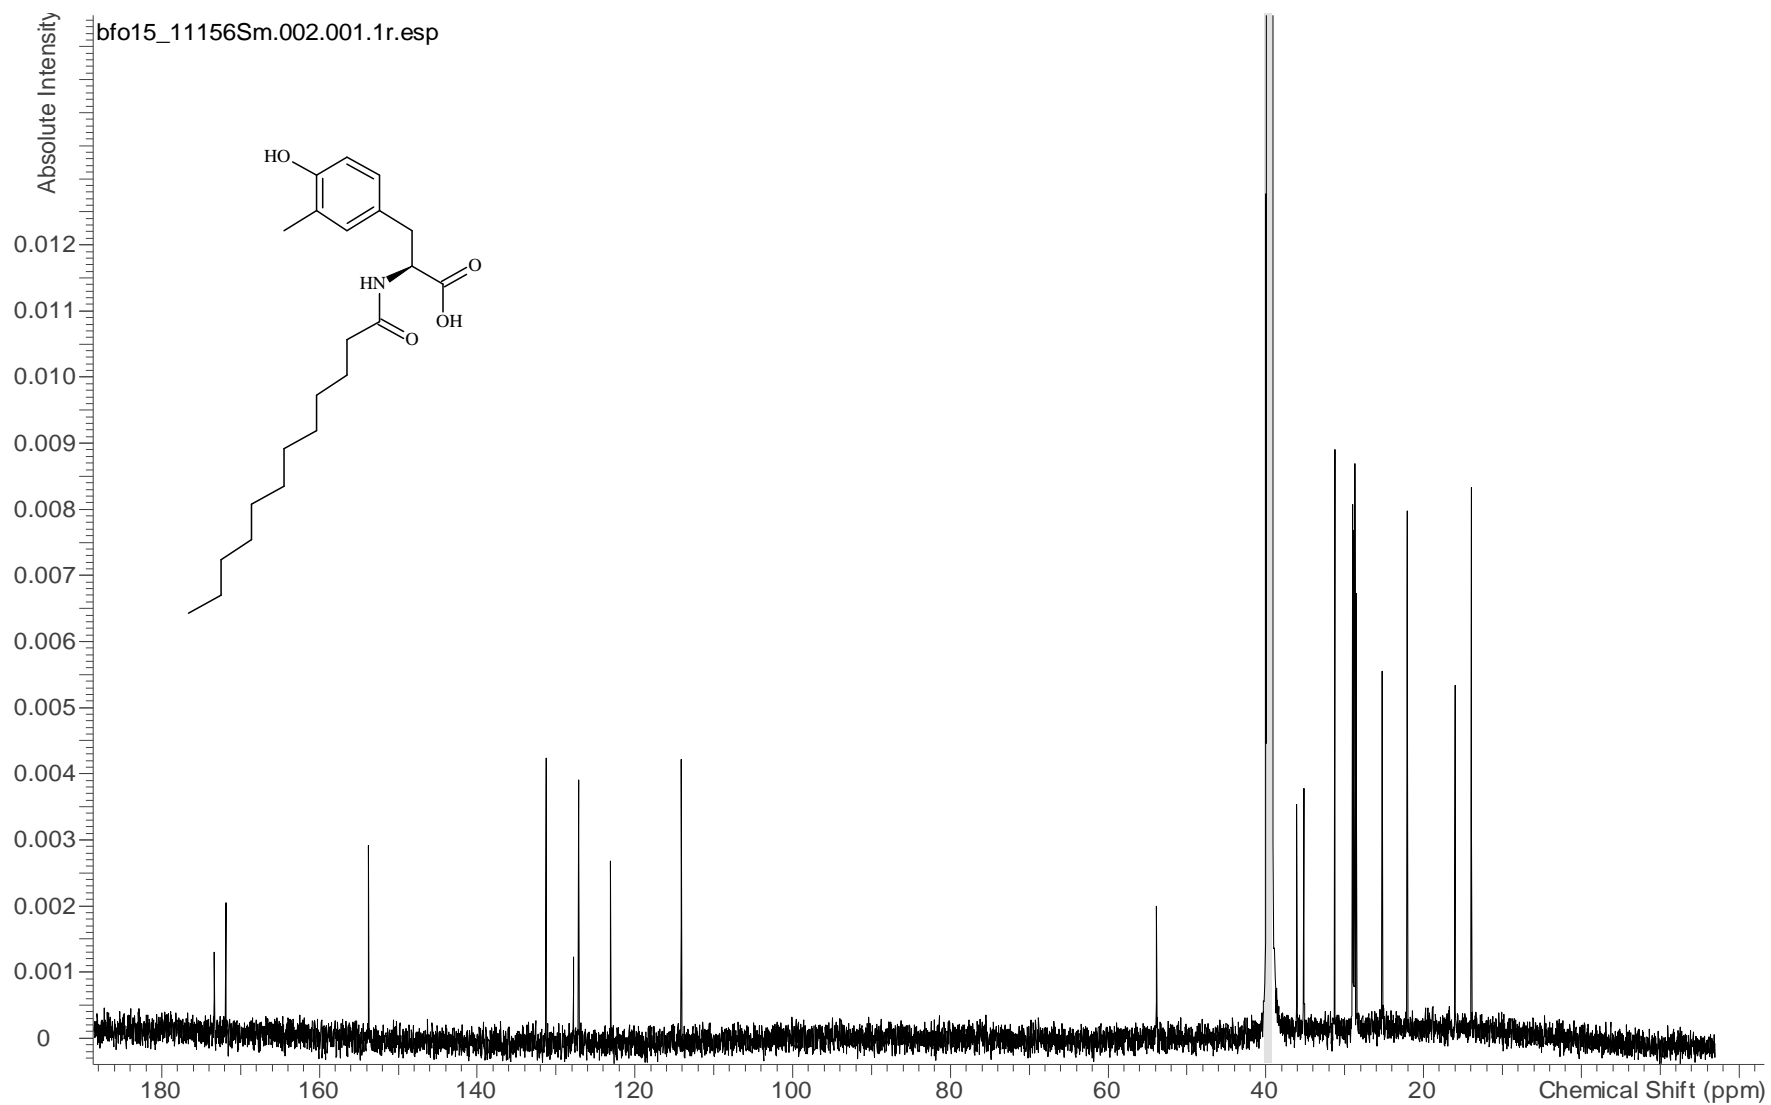



Supplementary Fig. 29. HMBC NMR spectrum (700 MHz, DMSO- $d_6$ ) of stielericine C (3)

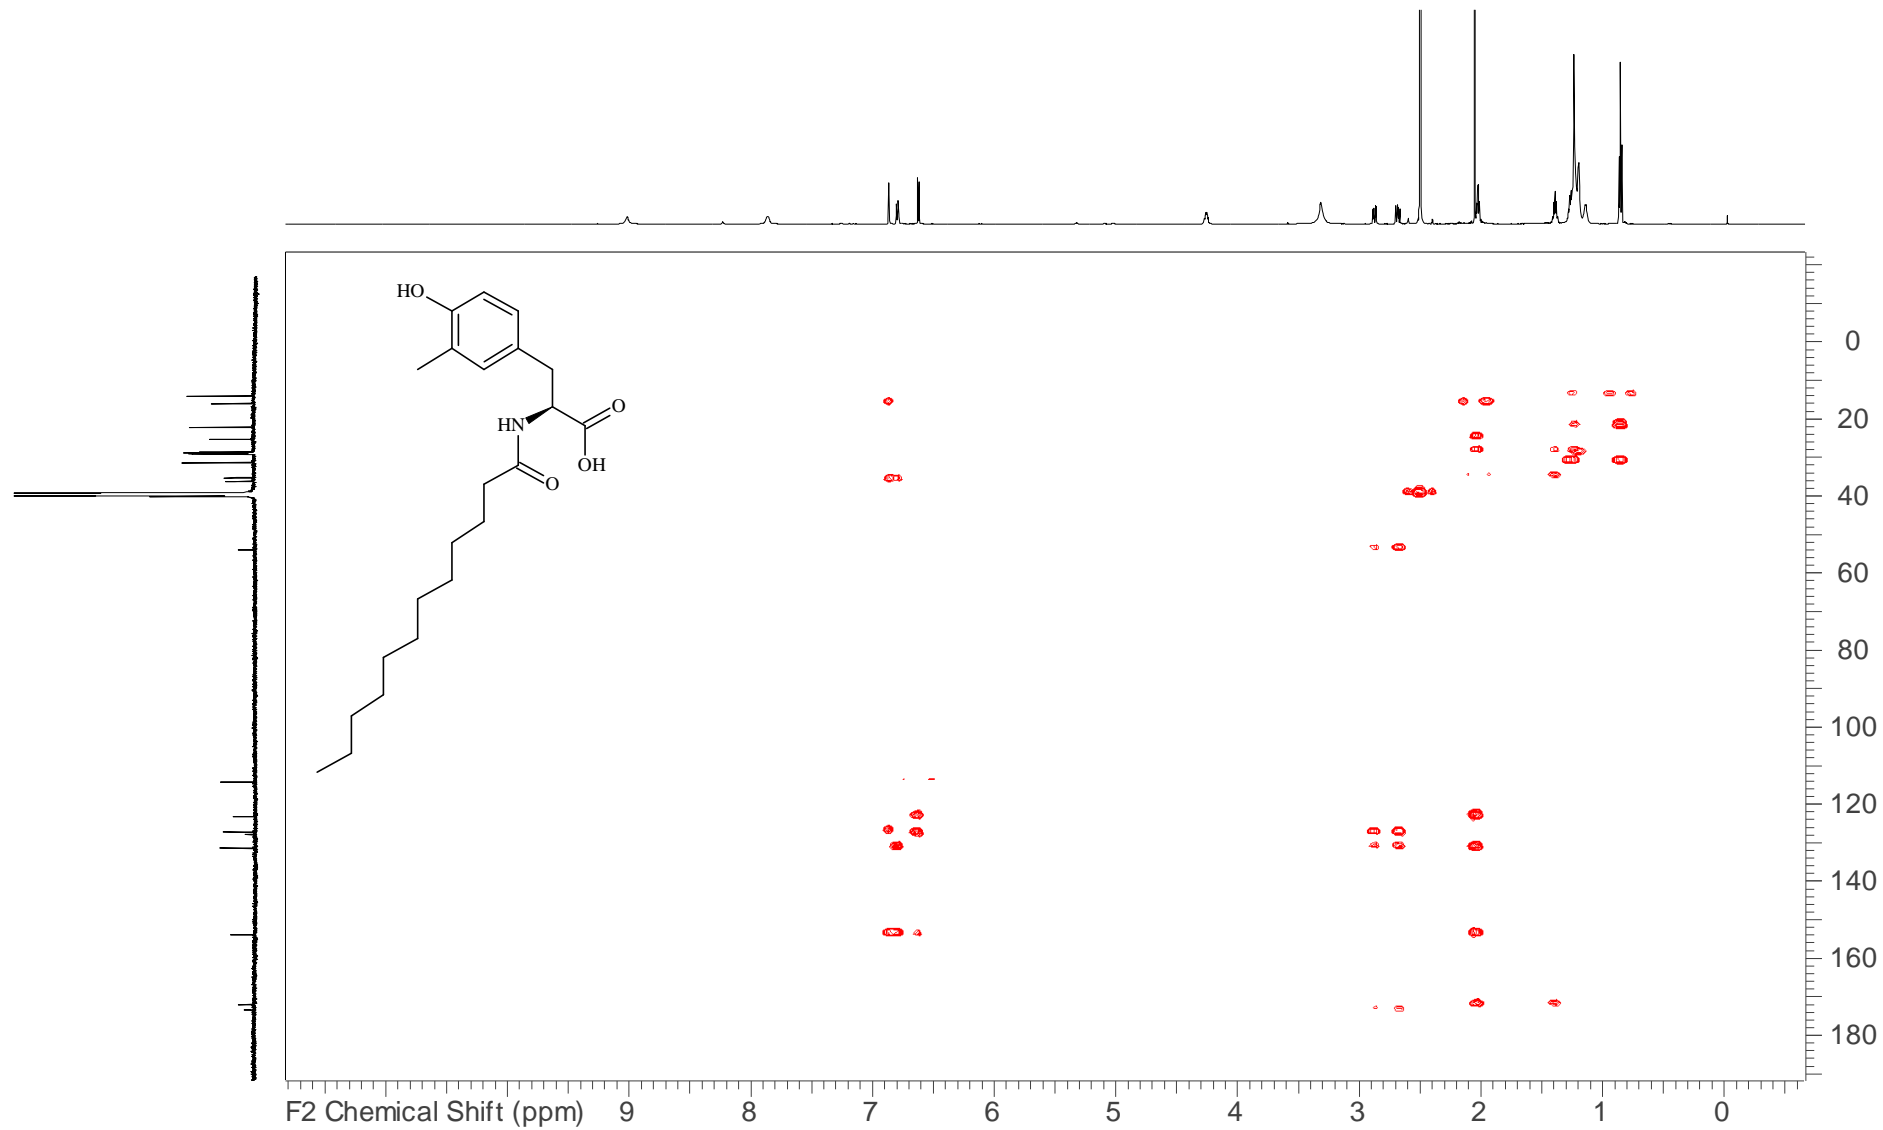

Supplementary Fig. 30. COSY NMR spectrum (700 MHz, DMSO-*d*<sub>6</sub>) of stieleriaceine C (3)

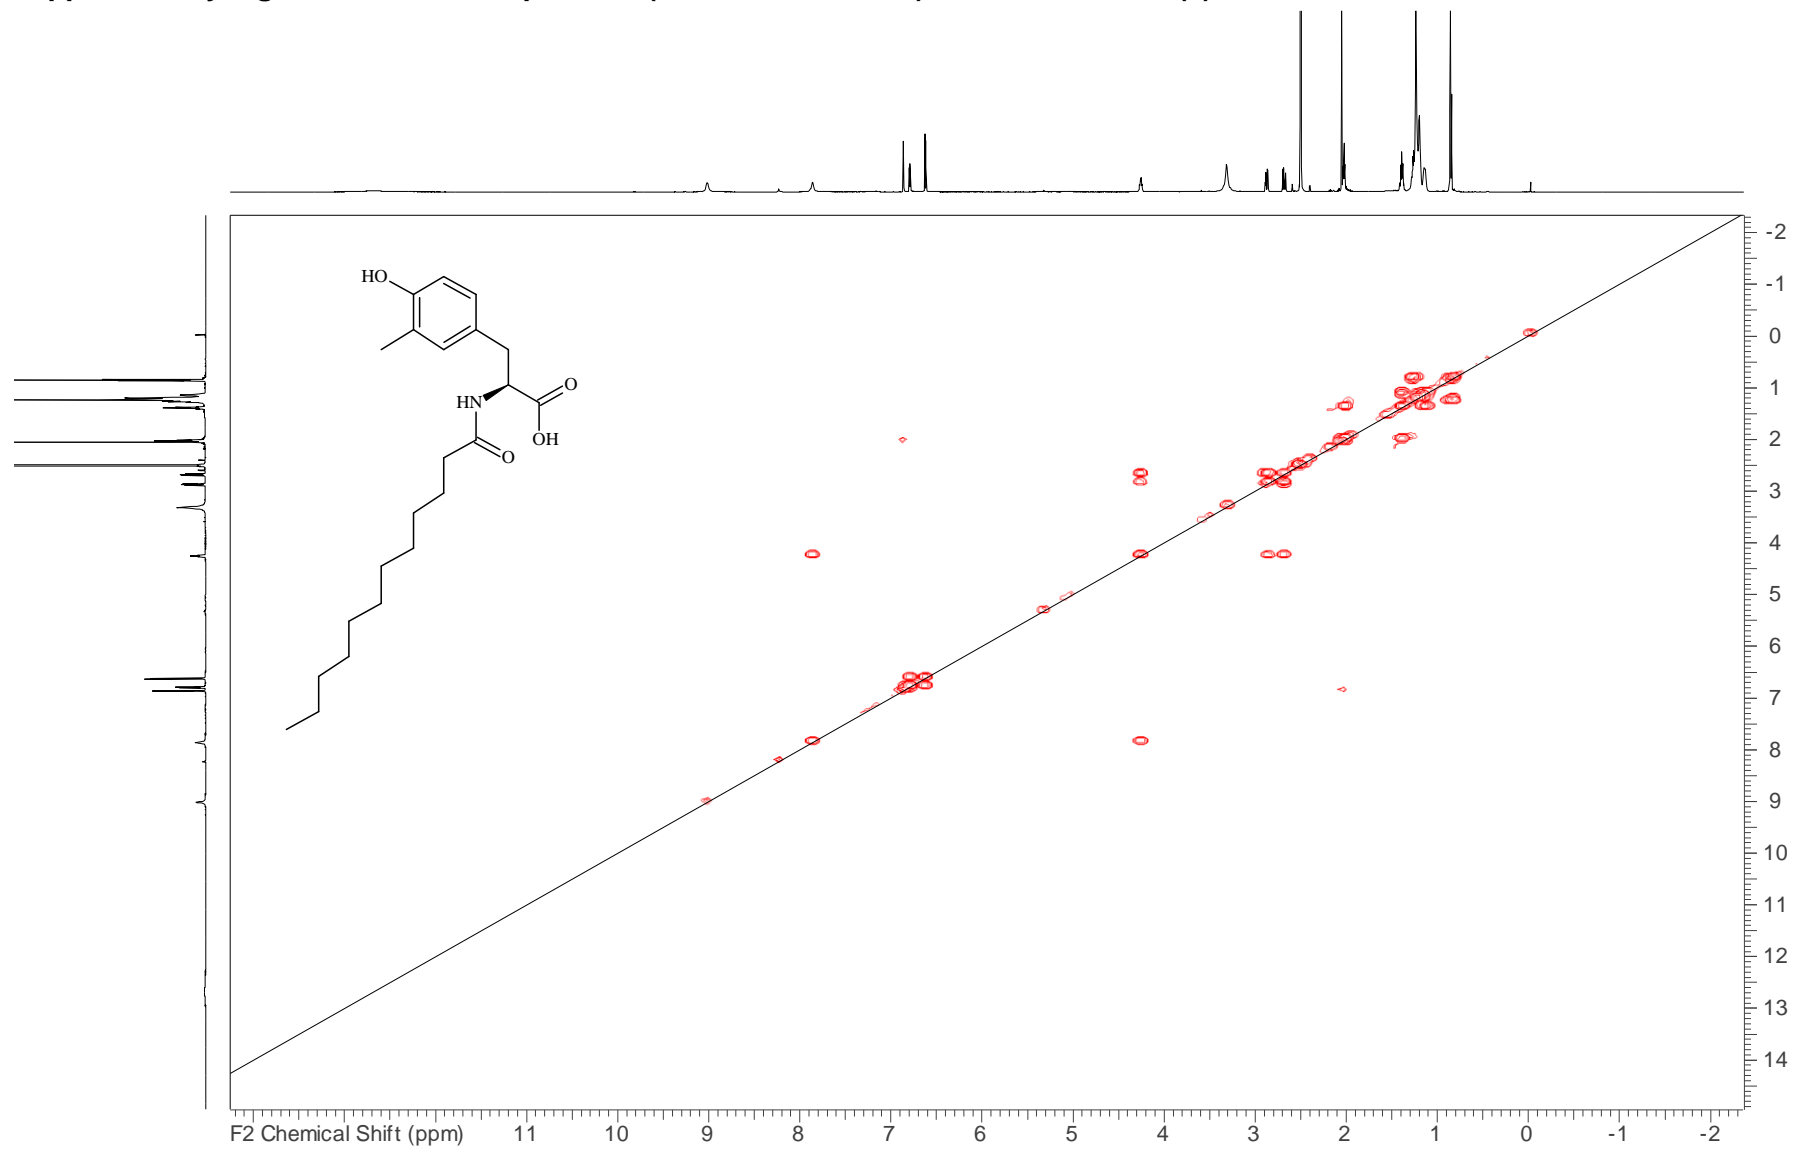

Supplementary Fig. 31. TOCSY NMR spectrum (700 MHz, DMSO-*d*<sub>6</sub>) of stielericine C (3)

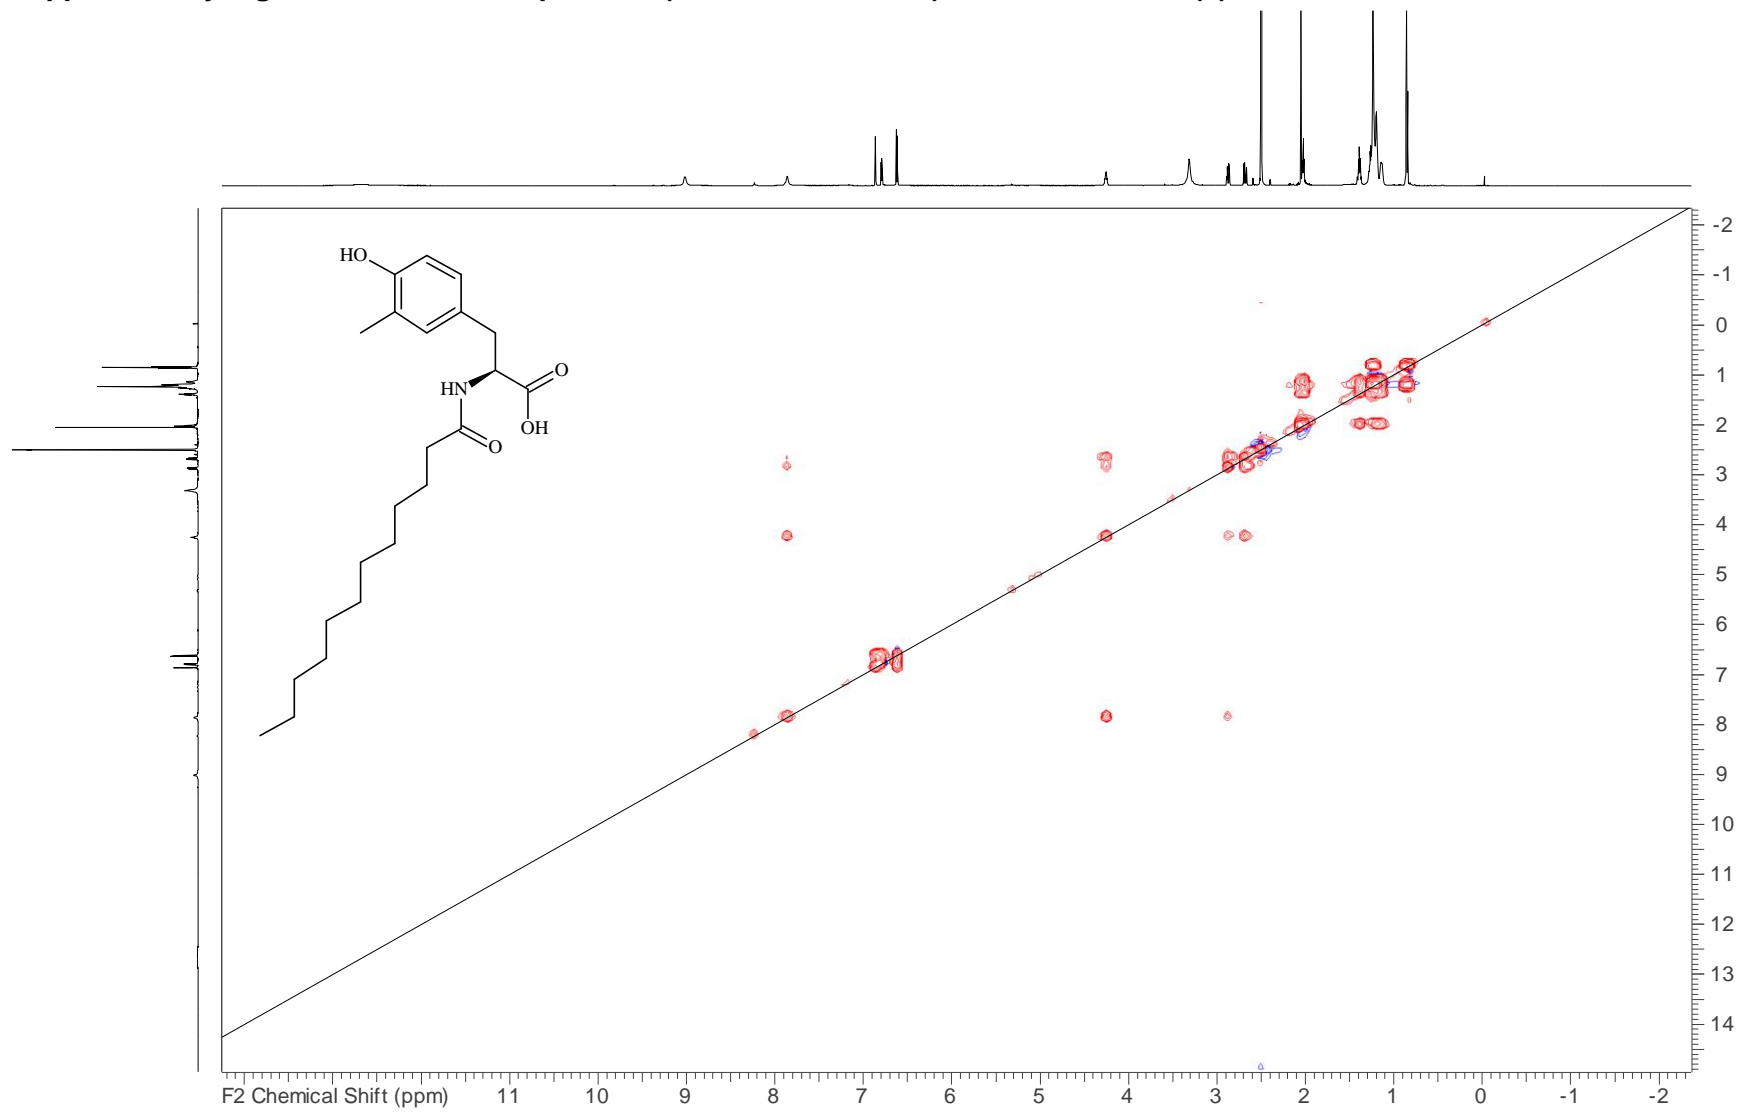

Supplementary Fig. 32. ROESY NMR spectrum (700 MHz, DMSO- $d_6$ ) of stielericine C (3)

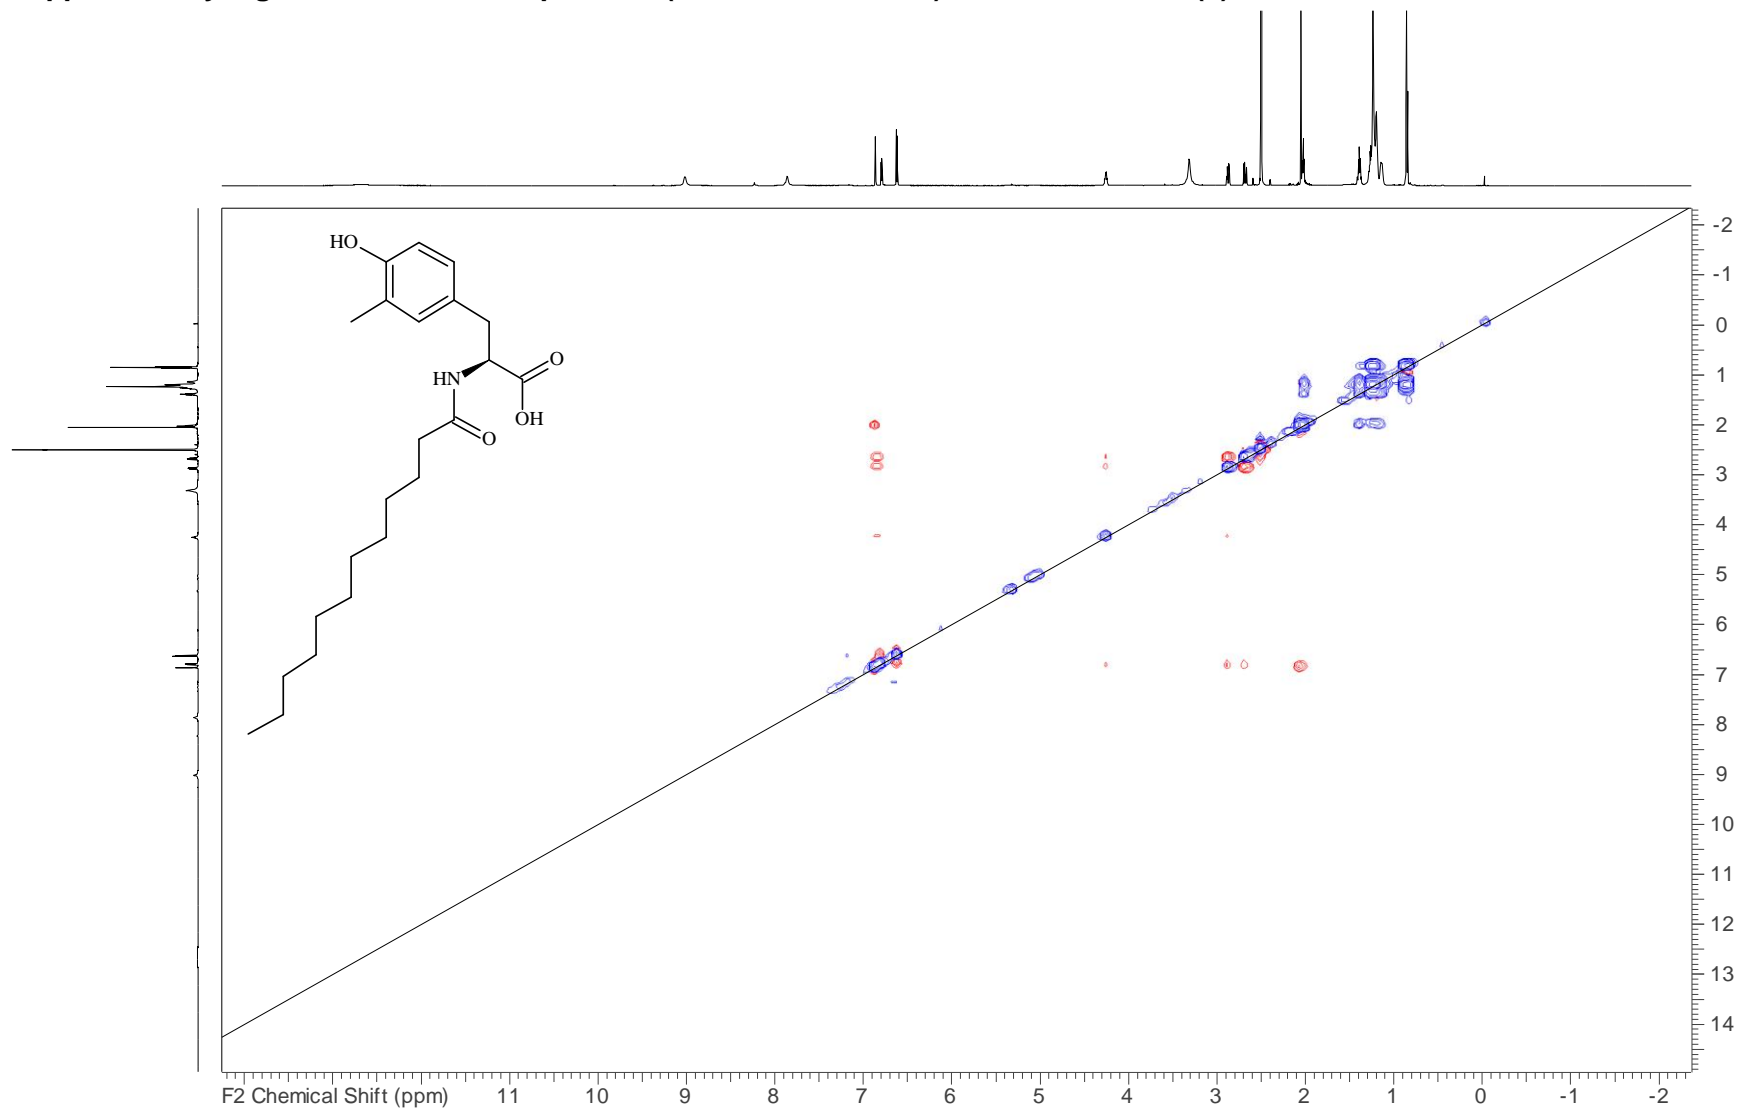



Supplementary Fig. 33. HRESIMS data of stieleriace A<sub>2</sub> (4)

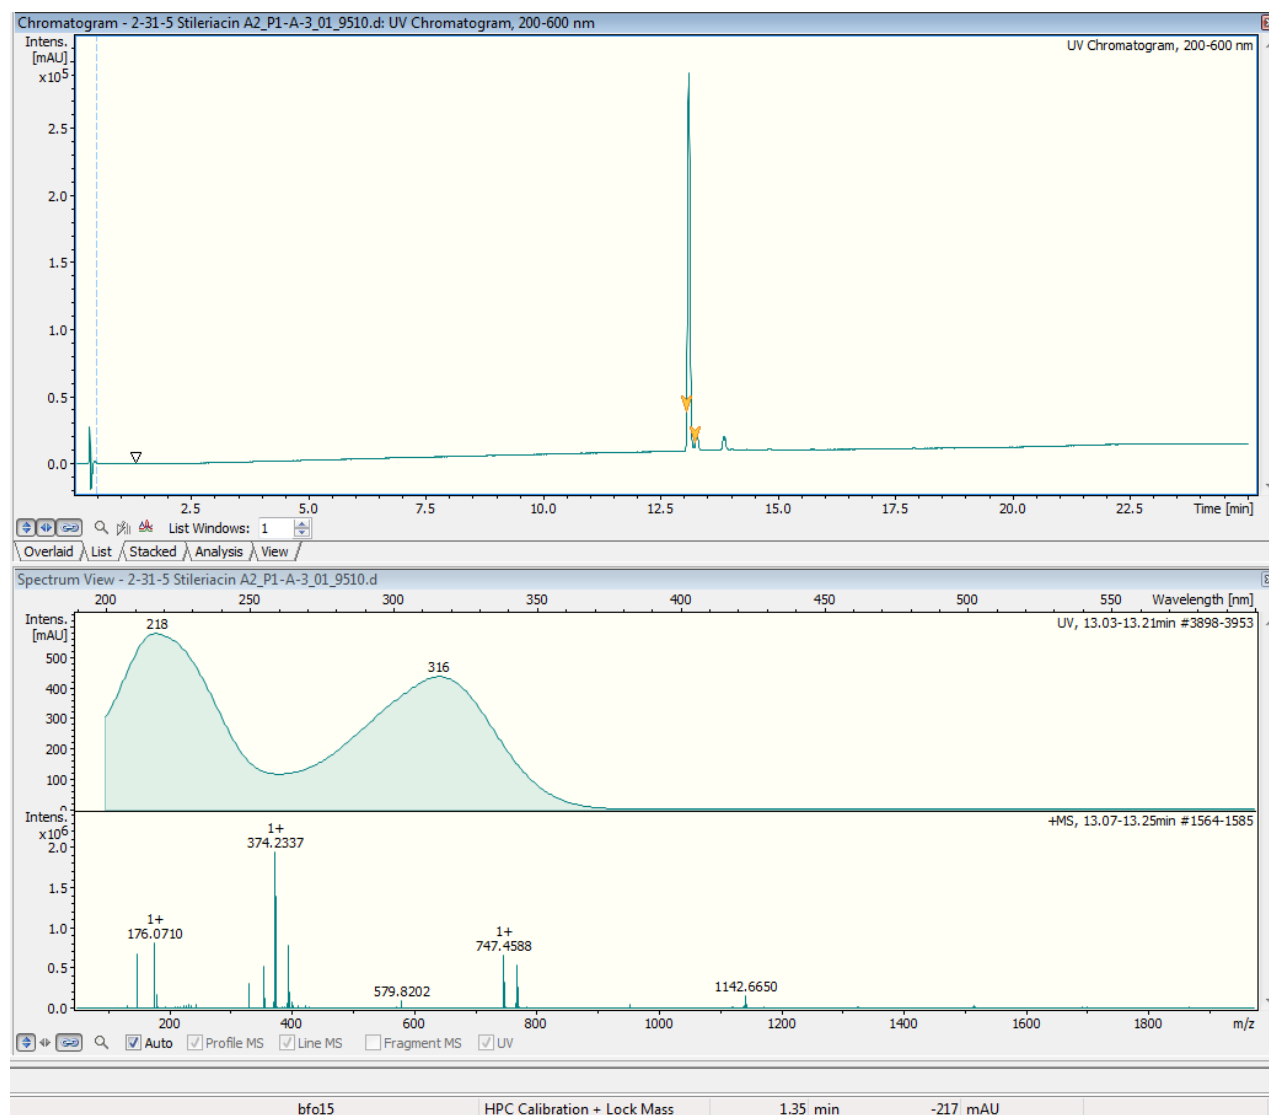

Supplementary Fig. 34. <sup>1</sup>H NMR spectrum (500 MHz, DMSO-d<sub>6</sub>) of stieleriace A<sub>2</sub> (4)

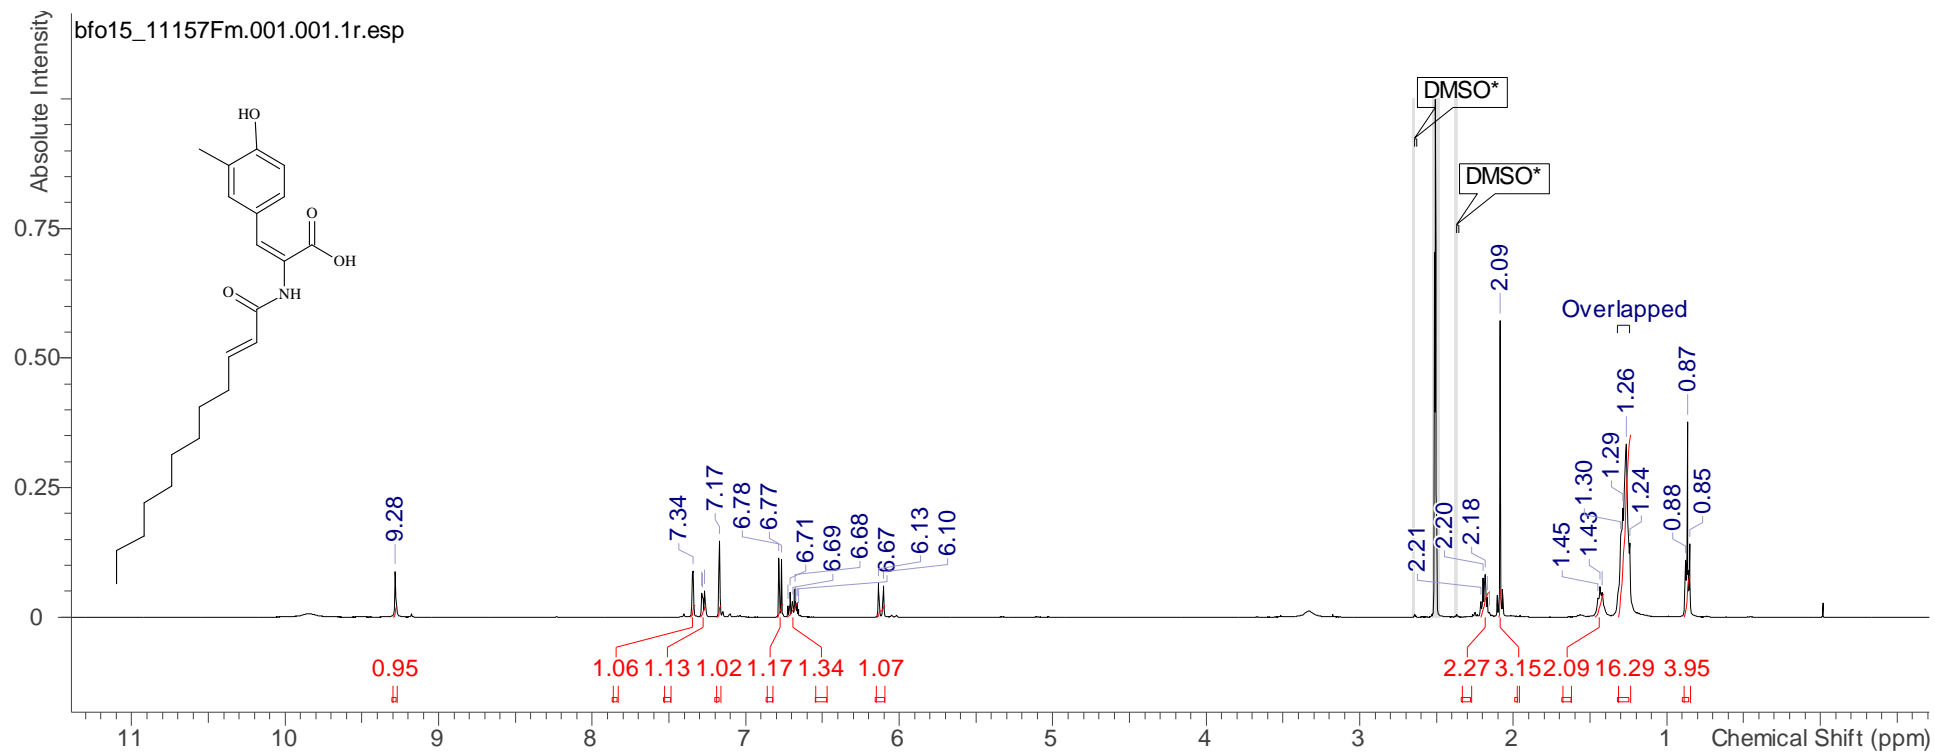

Supplementary Fig. 35.  $^{13}\text{C}$  NMR spectrum (126 MHz,  $\text{DMSO-}d_6$ ) of stieleriaine  $\text{A}_2$  (4)

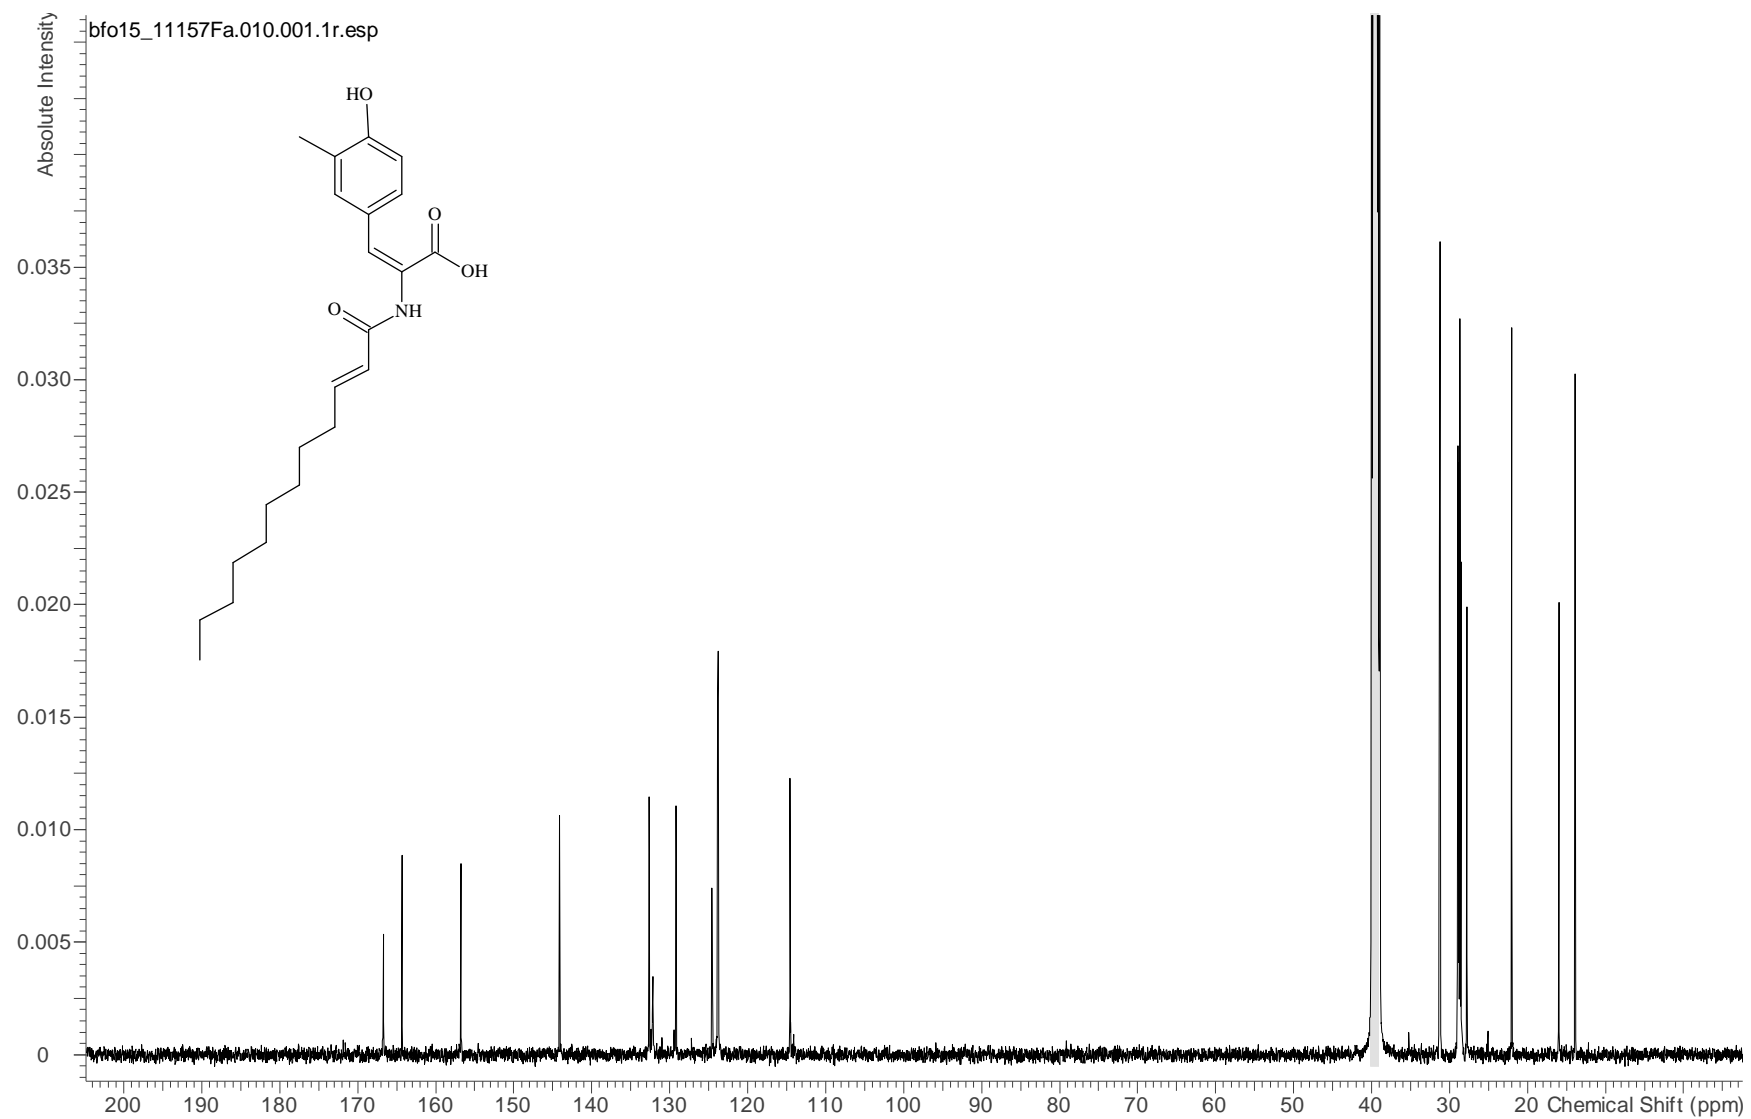

Supplementary Fig. 36. HSQC NMR spectrum (500 MHz, DMSO-*d*<sub>6</sub>) of stielericine A<sub>2</sub> (4)

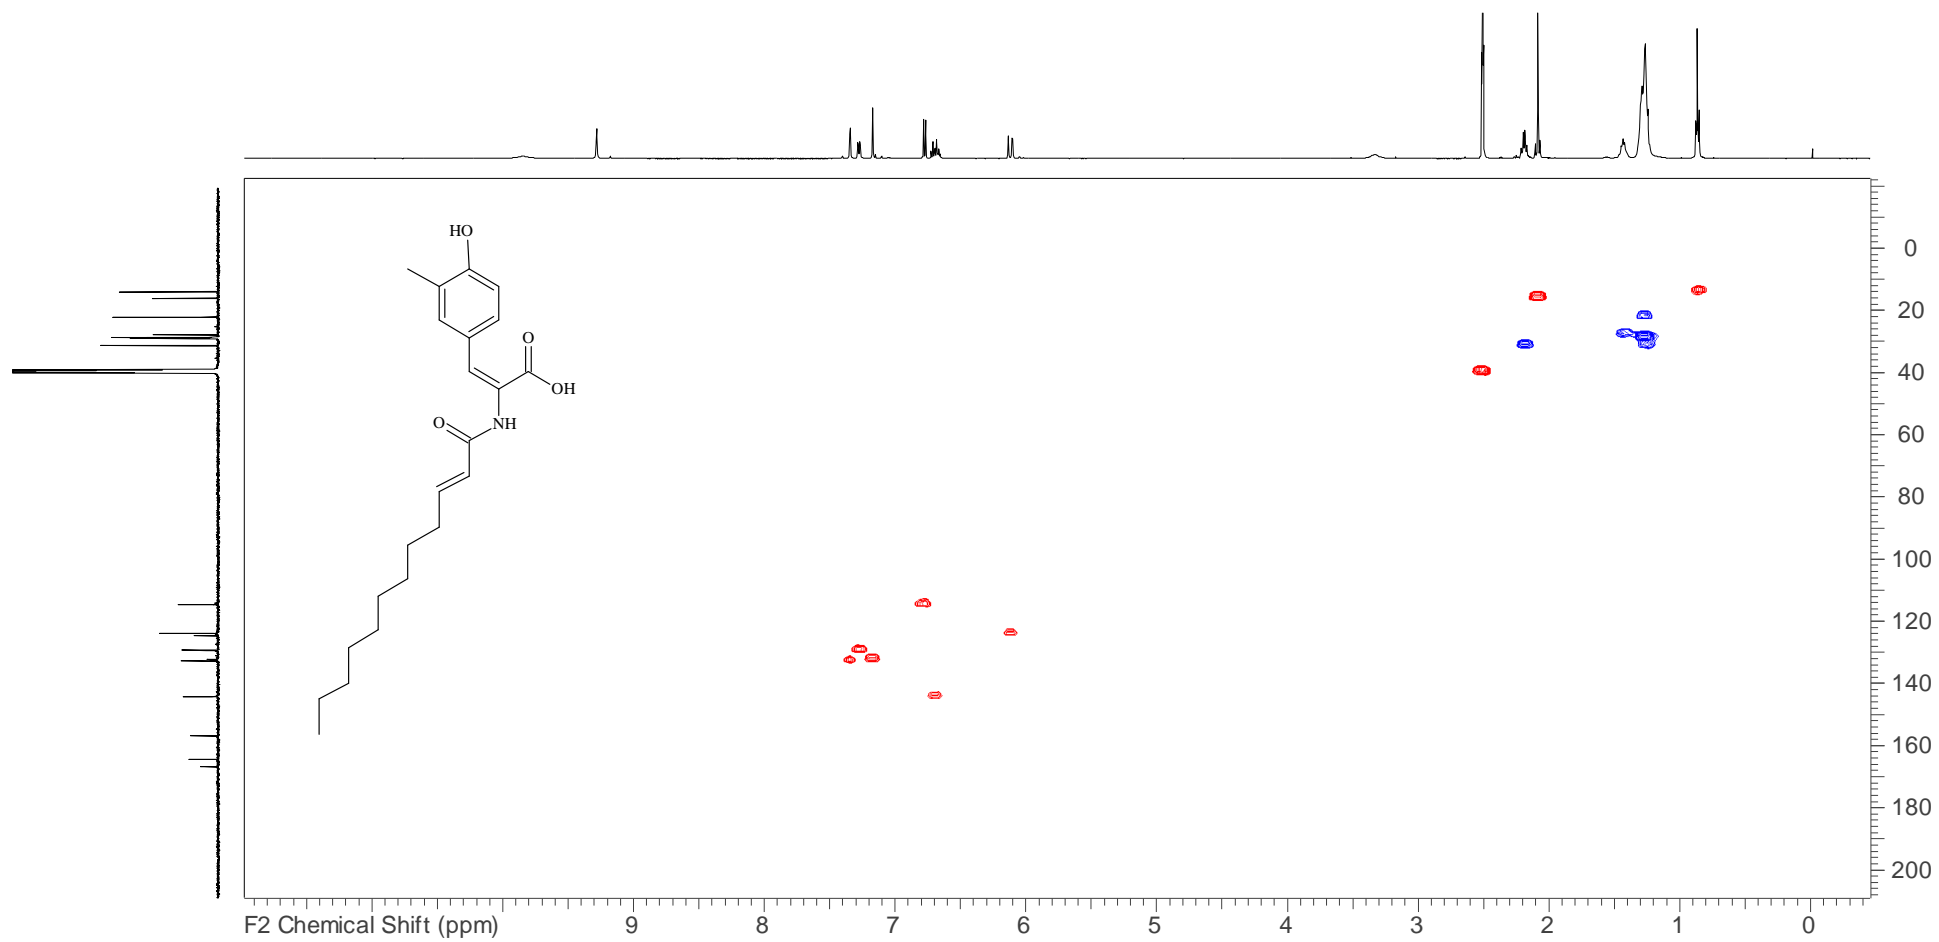

Supplementary Fig. 37. HMBC NMR spectrum (500 MHz, DMSO-*d*<sub>6</sub>) of stieleriace A<sub>2</sub> (4)

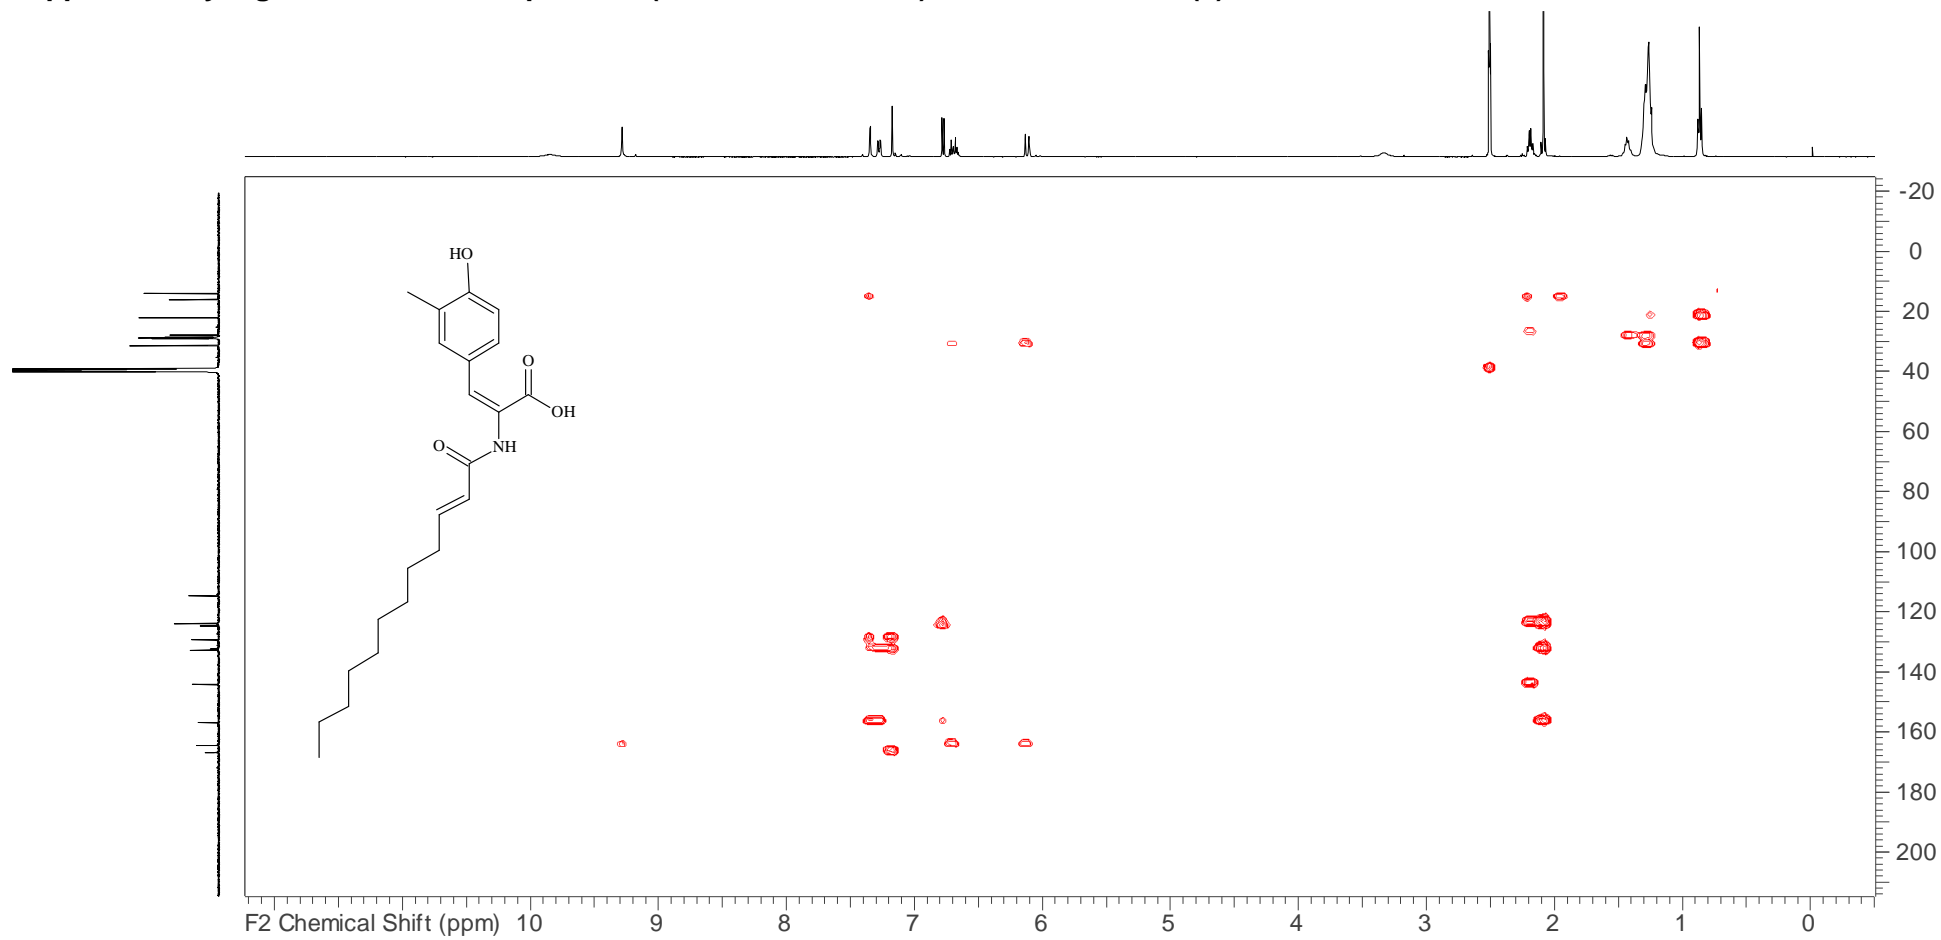

Supplementary Fig. 38. COSY NMR spectrum (500 MHz, DMSO-*d*<sub>6</sub>) of stieleriaccine A<sub>2</sub> (4)

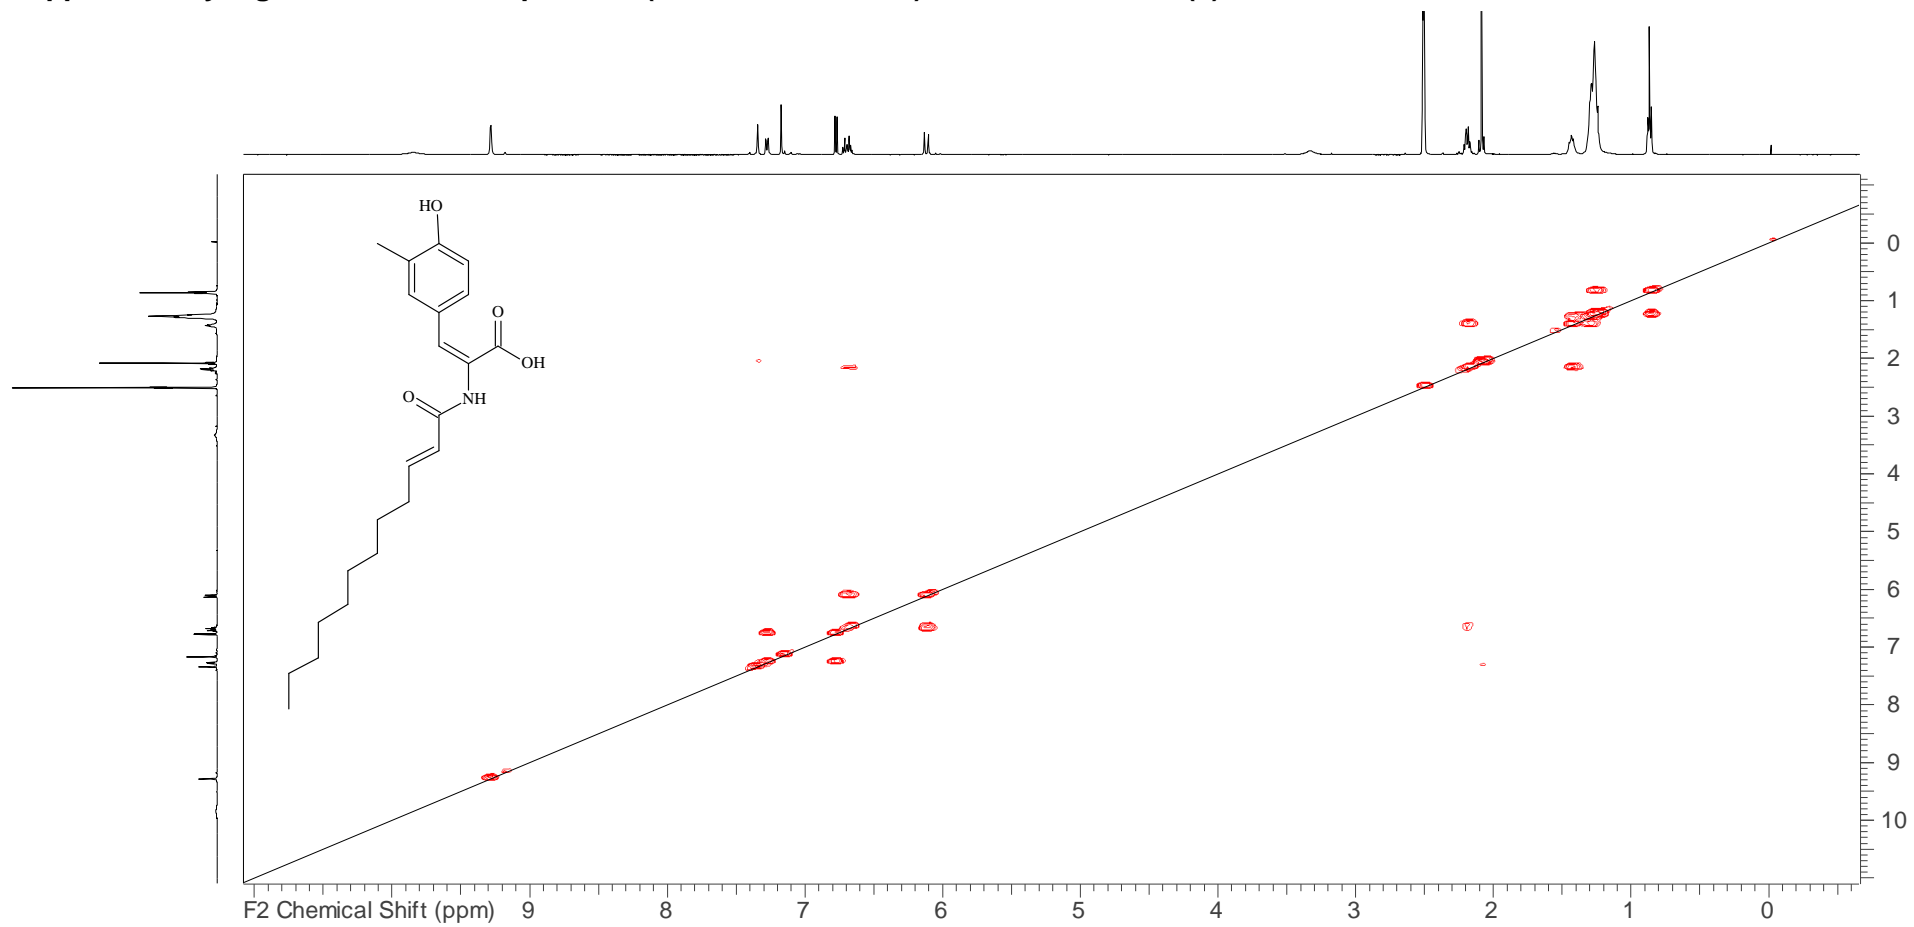

Supplementary Fig. 39. TOCSY NMR spectrum (500 MHz, DMSO-*d*<sub>6</sub>) of stieleriaccine A<sub>2</sub> (4)

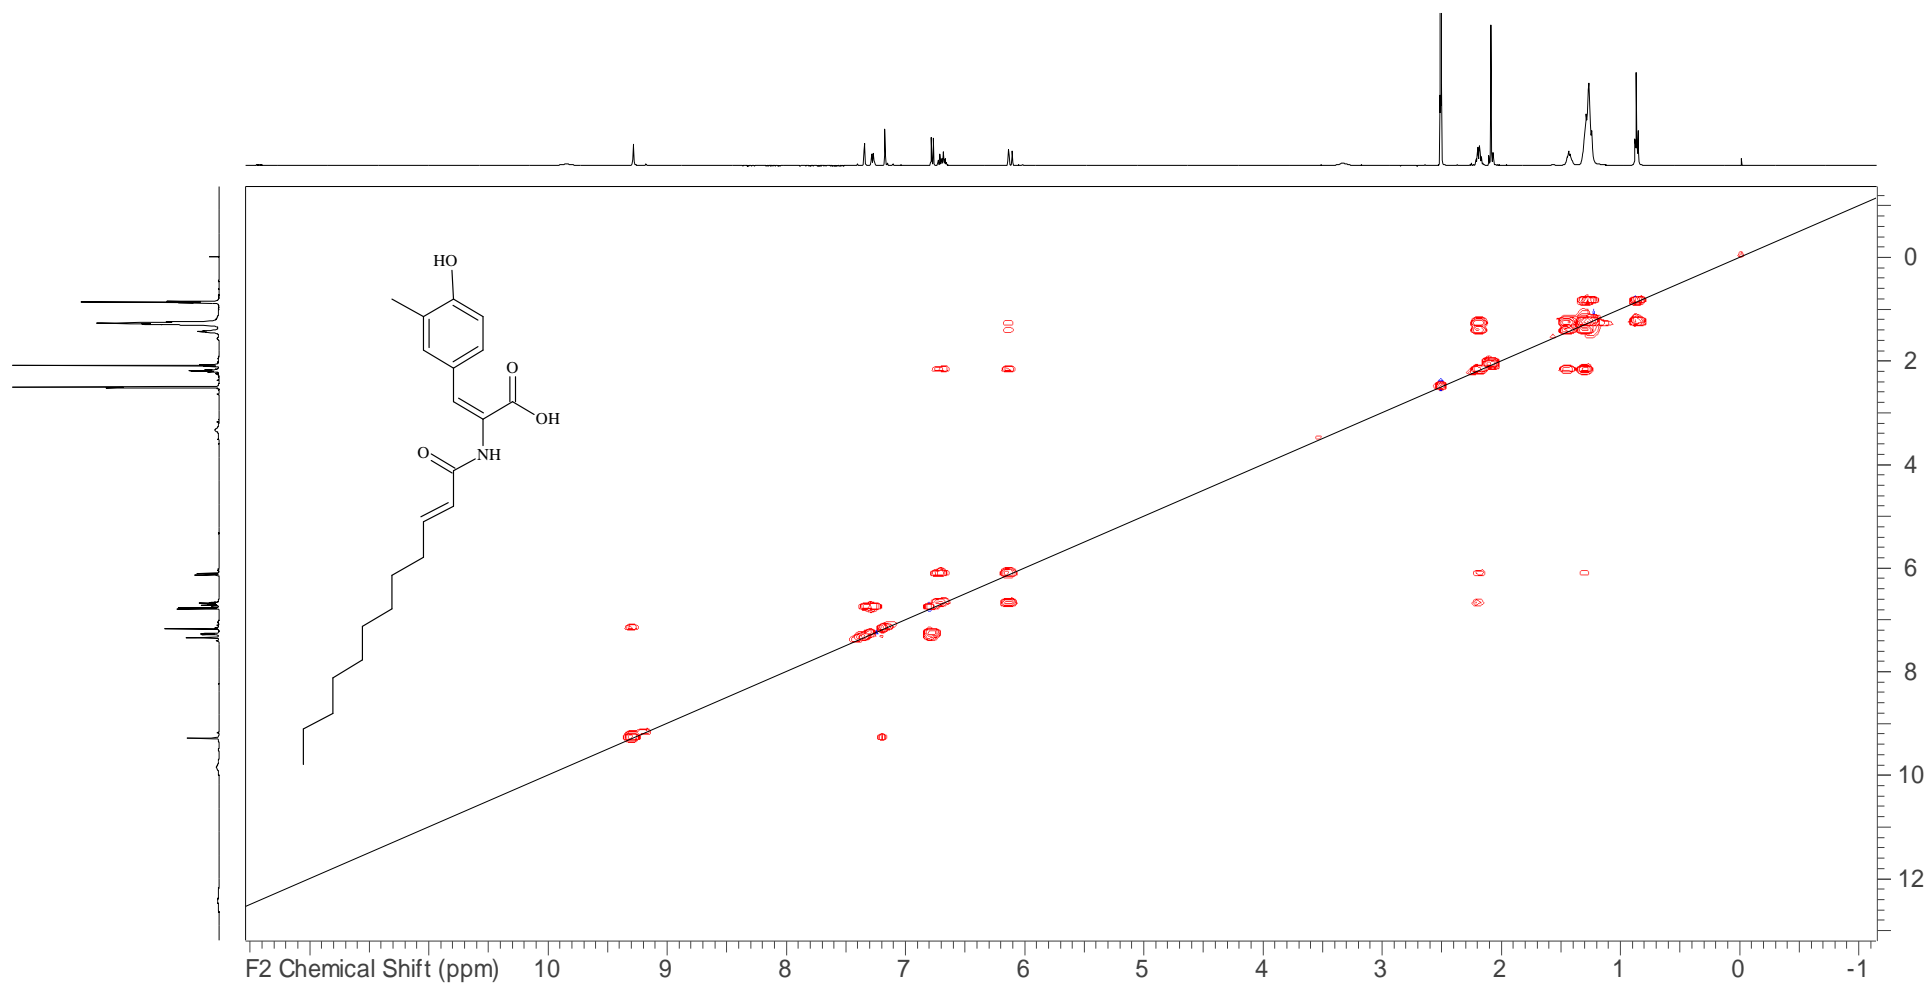

Supplementary Fig. 40. ROESY NMR spectrum (500 MHz, DMSO- $d_6$ ) of stieleriace A<sub>2</sub> (4)

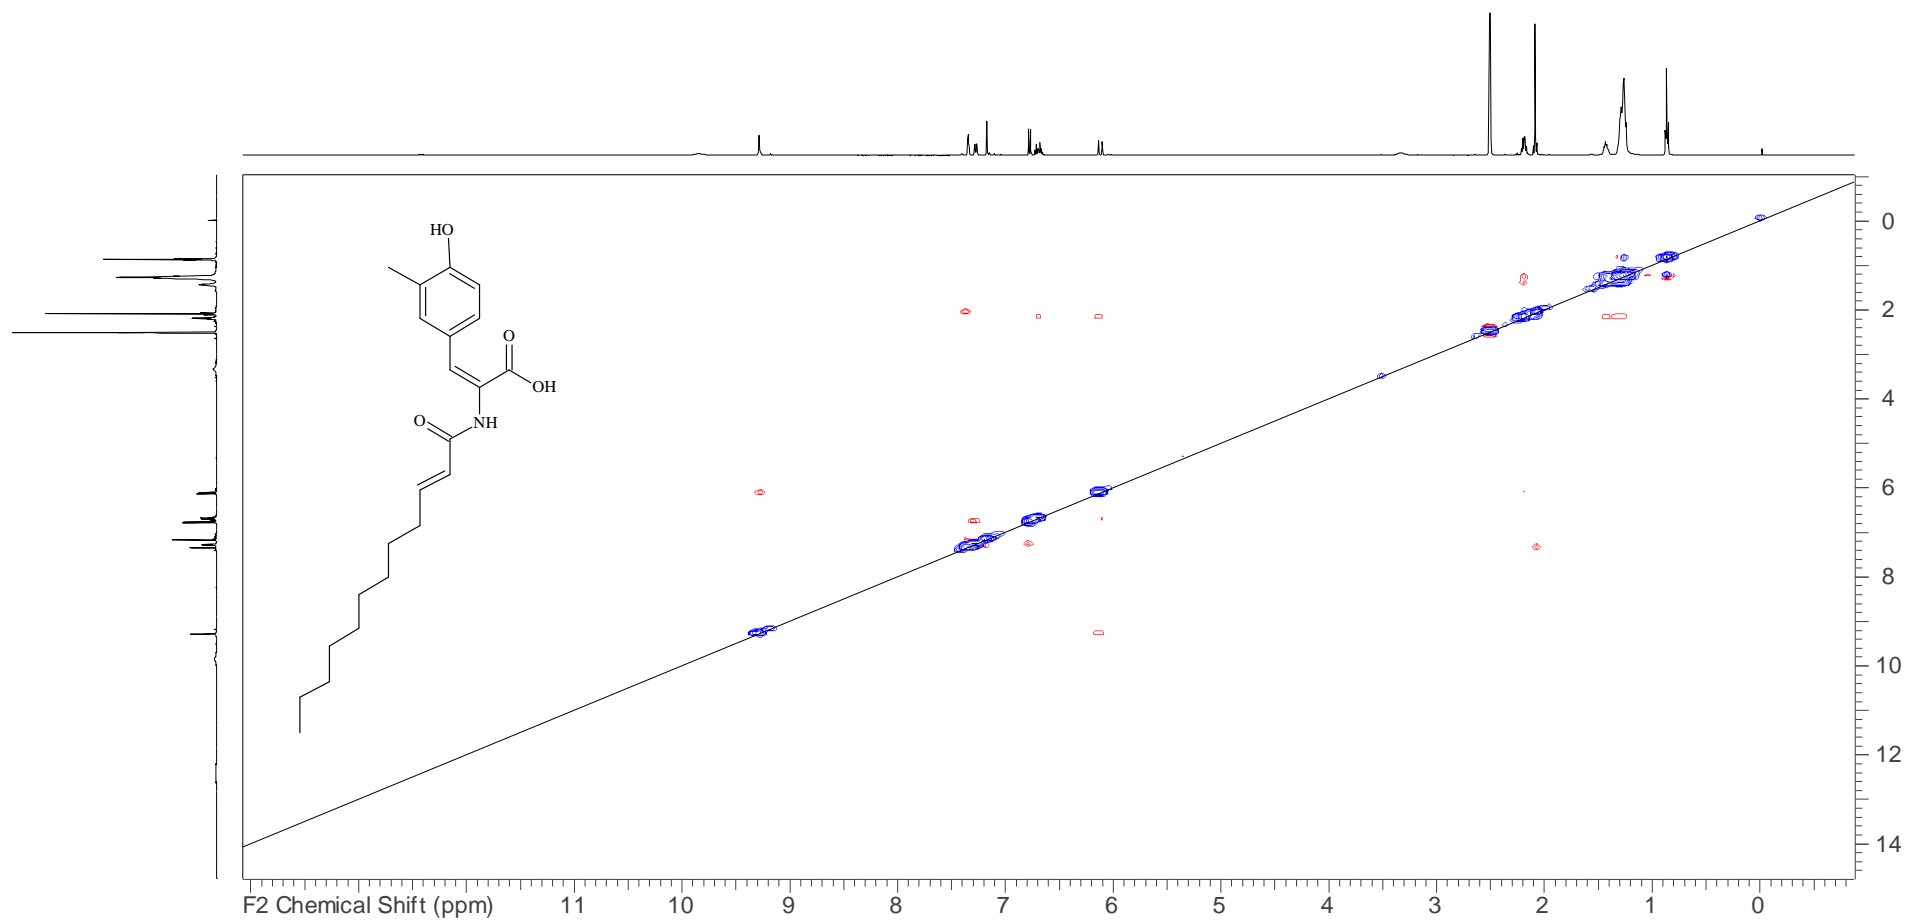



Supplementary Fig. 41. HRESIMS data of stileriicine B<sub>2</sub> (5)

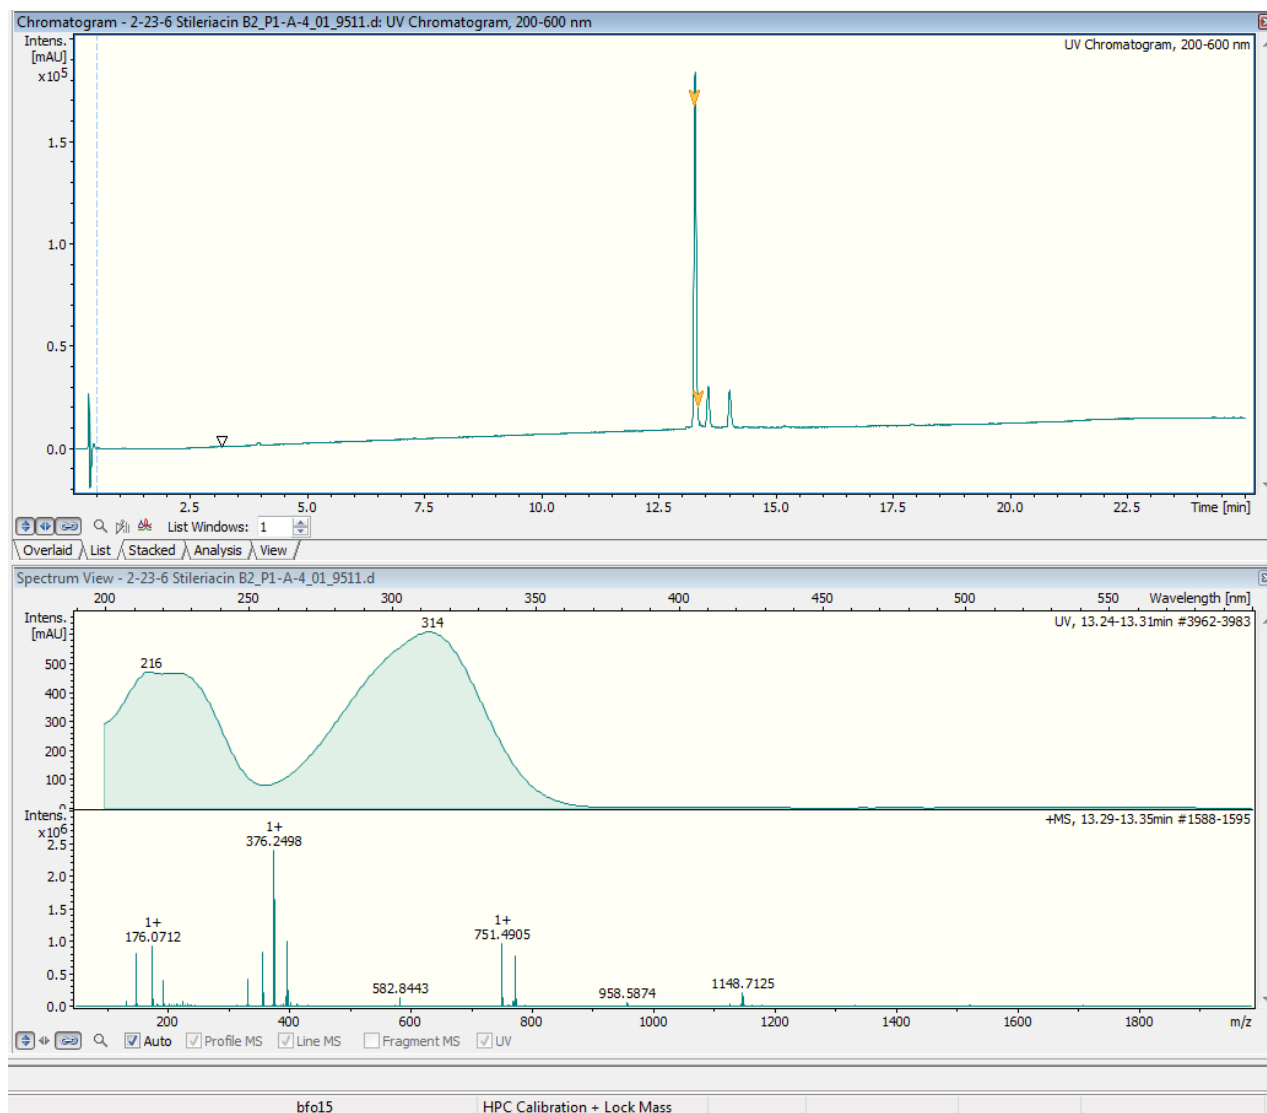

Supplementary Fig. 42. <sup>1</sup>H NMR spectrum (500 MHz, DMSO-d<sub>6</sub>) of stieleriace B<sub>2</sub> (5)

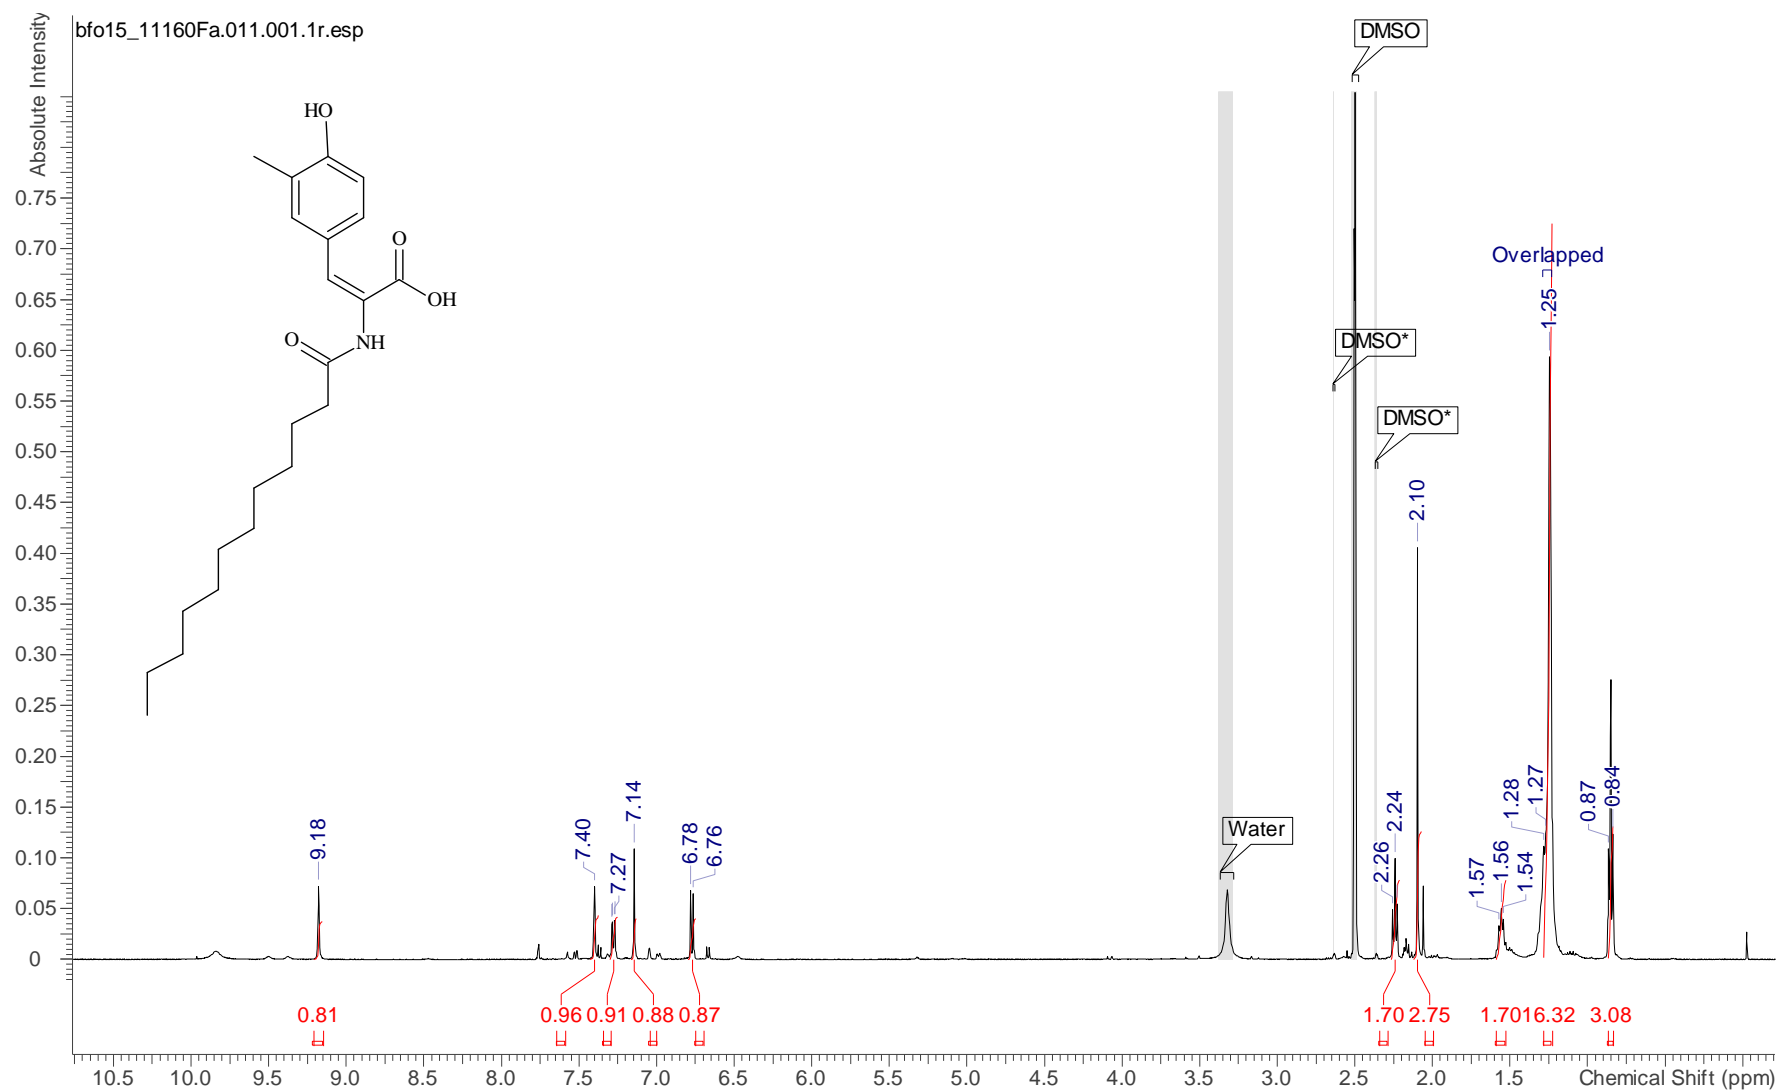

Supplementary Fig. 43.  $^{13}\text{C}$  NMR spectrum (126 MHz,  $\text{DMSO-}d_6$ ) of stieleriaine B<sub>2</sub> (5)

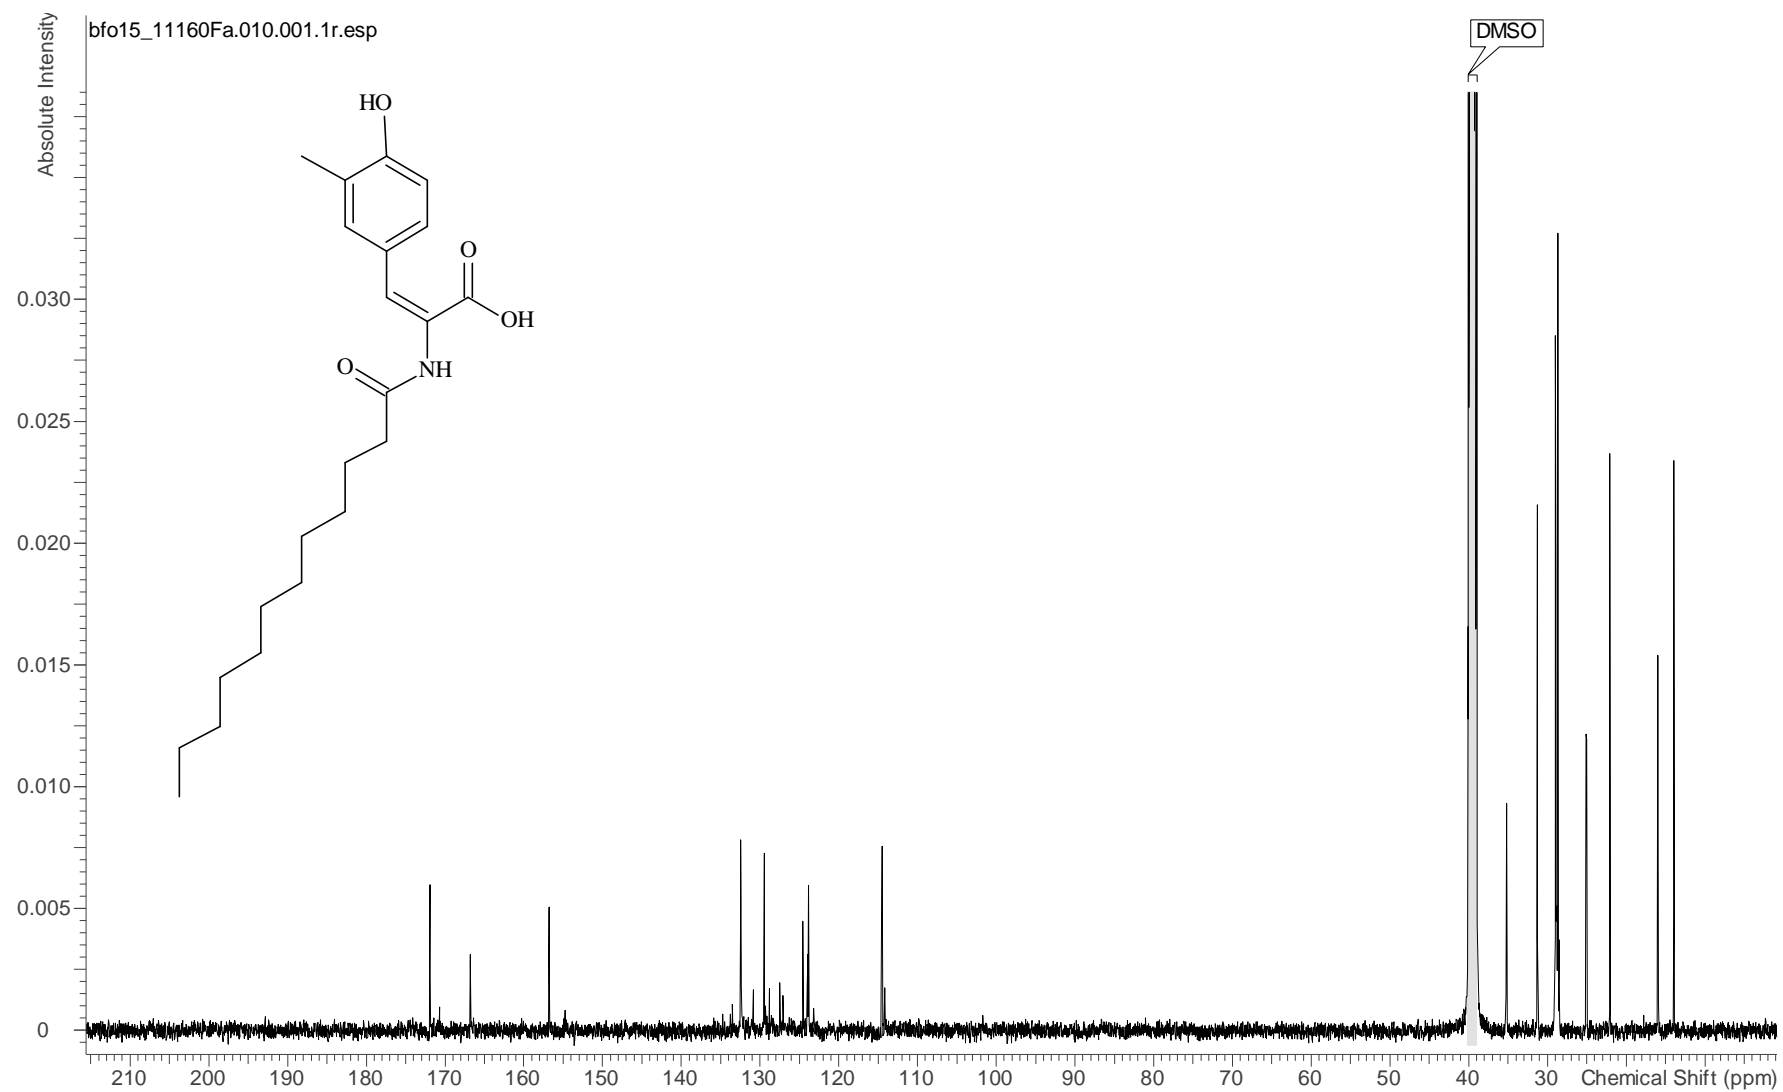

Supplementary Fig. 44. HSQC NMR spectrum (500 MHz, DMSO-*d*<sub>6</sub>) of stieleriaceine B<sub>2</sub> (5)

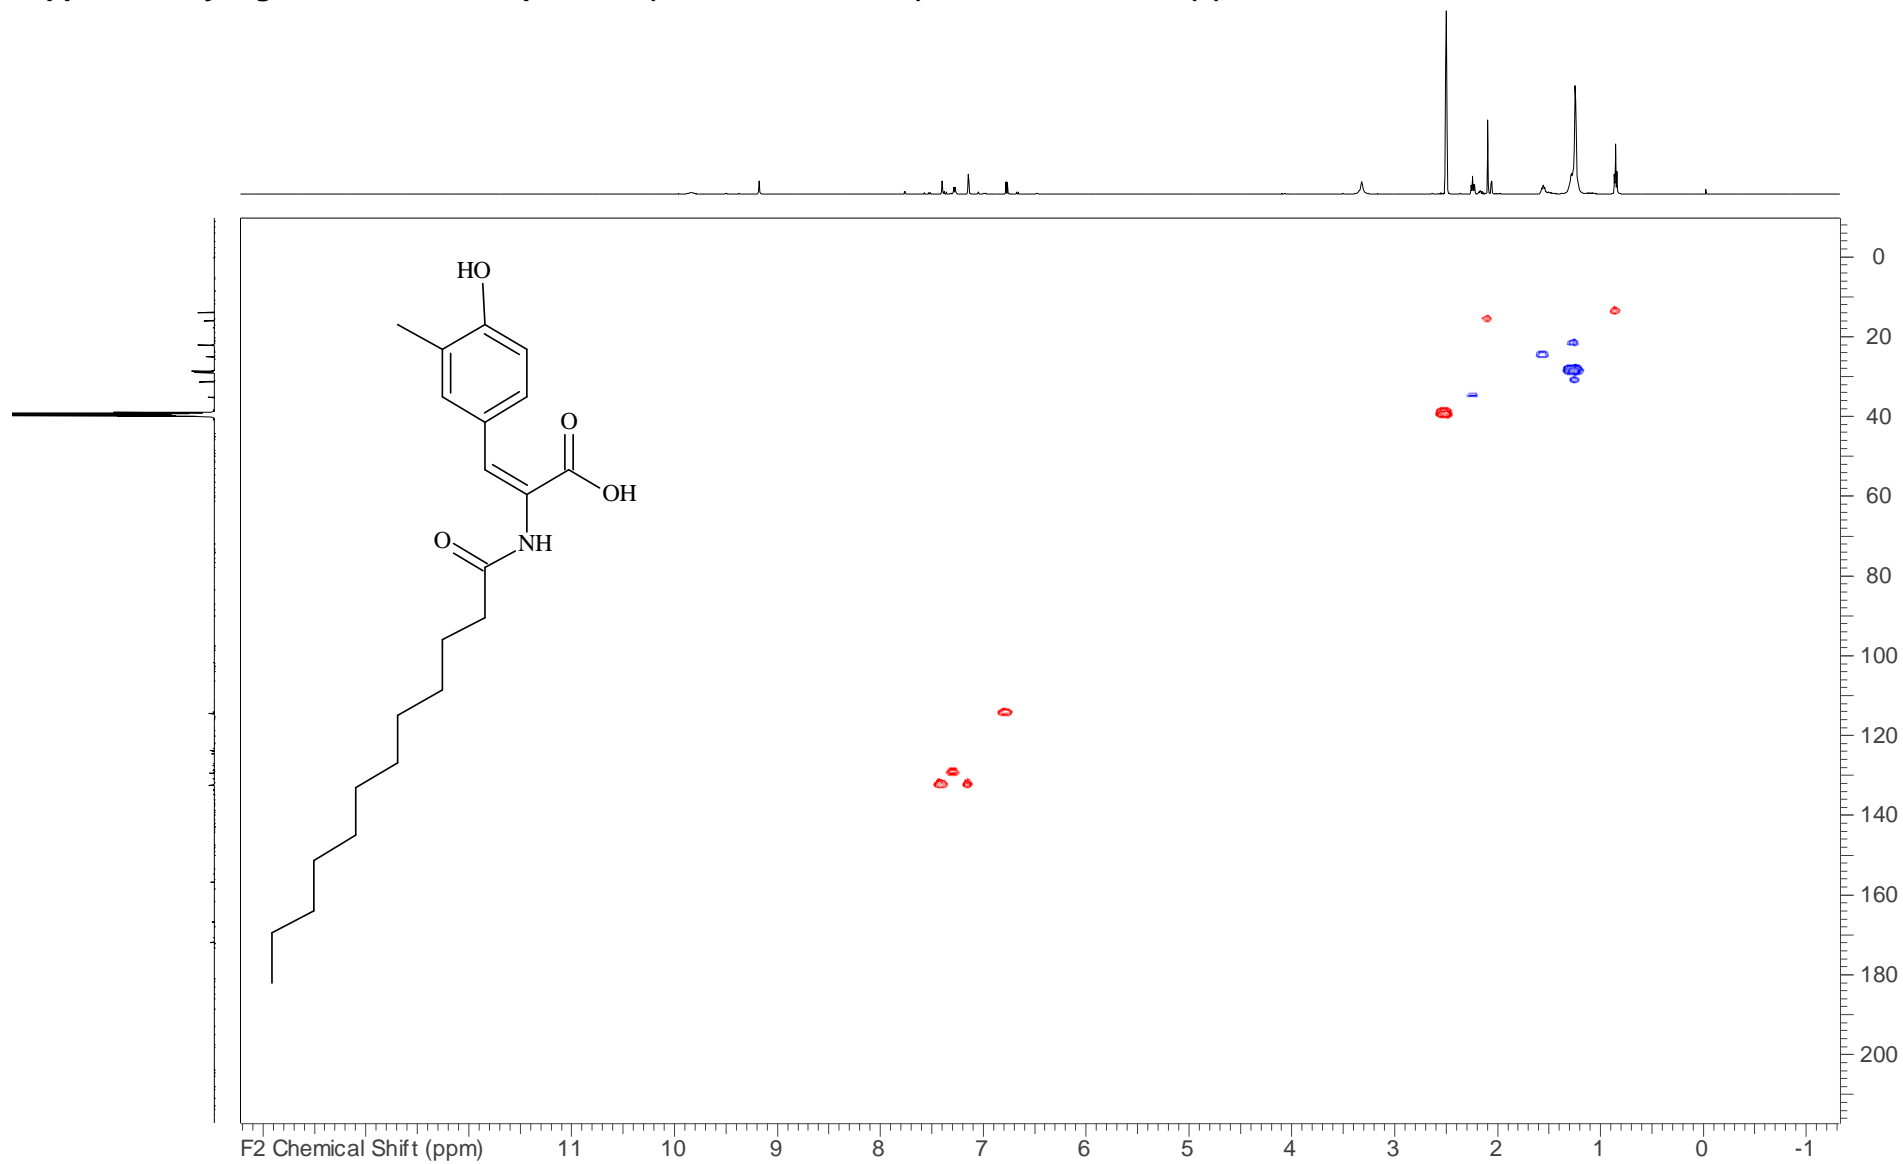

Supplementary Fig. 45. HMBC NMR spectrum (500 MHz, DMSO-*d*<sub>6</sub>) of stieleriace B<sub>2</sub> (5)

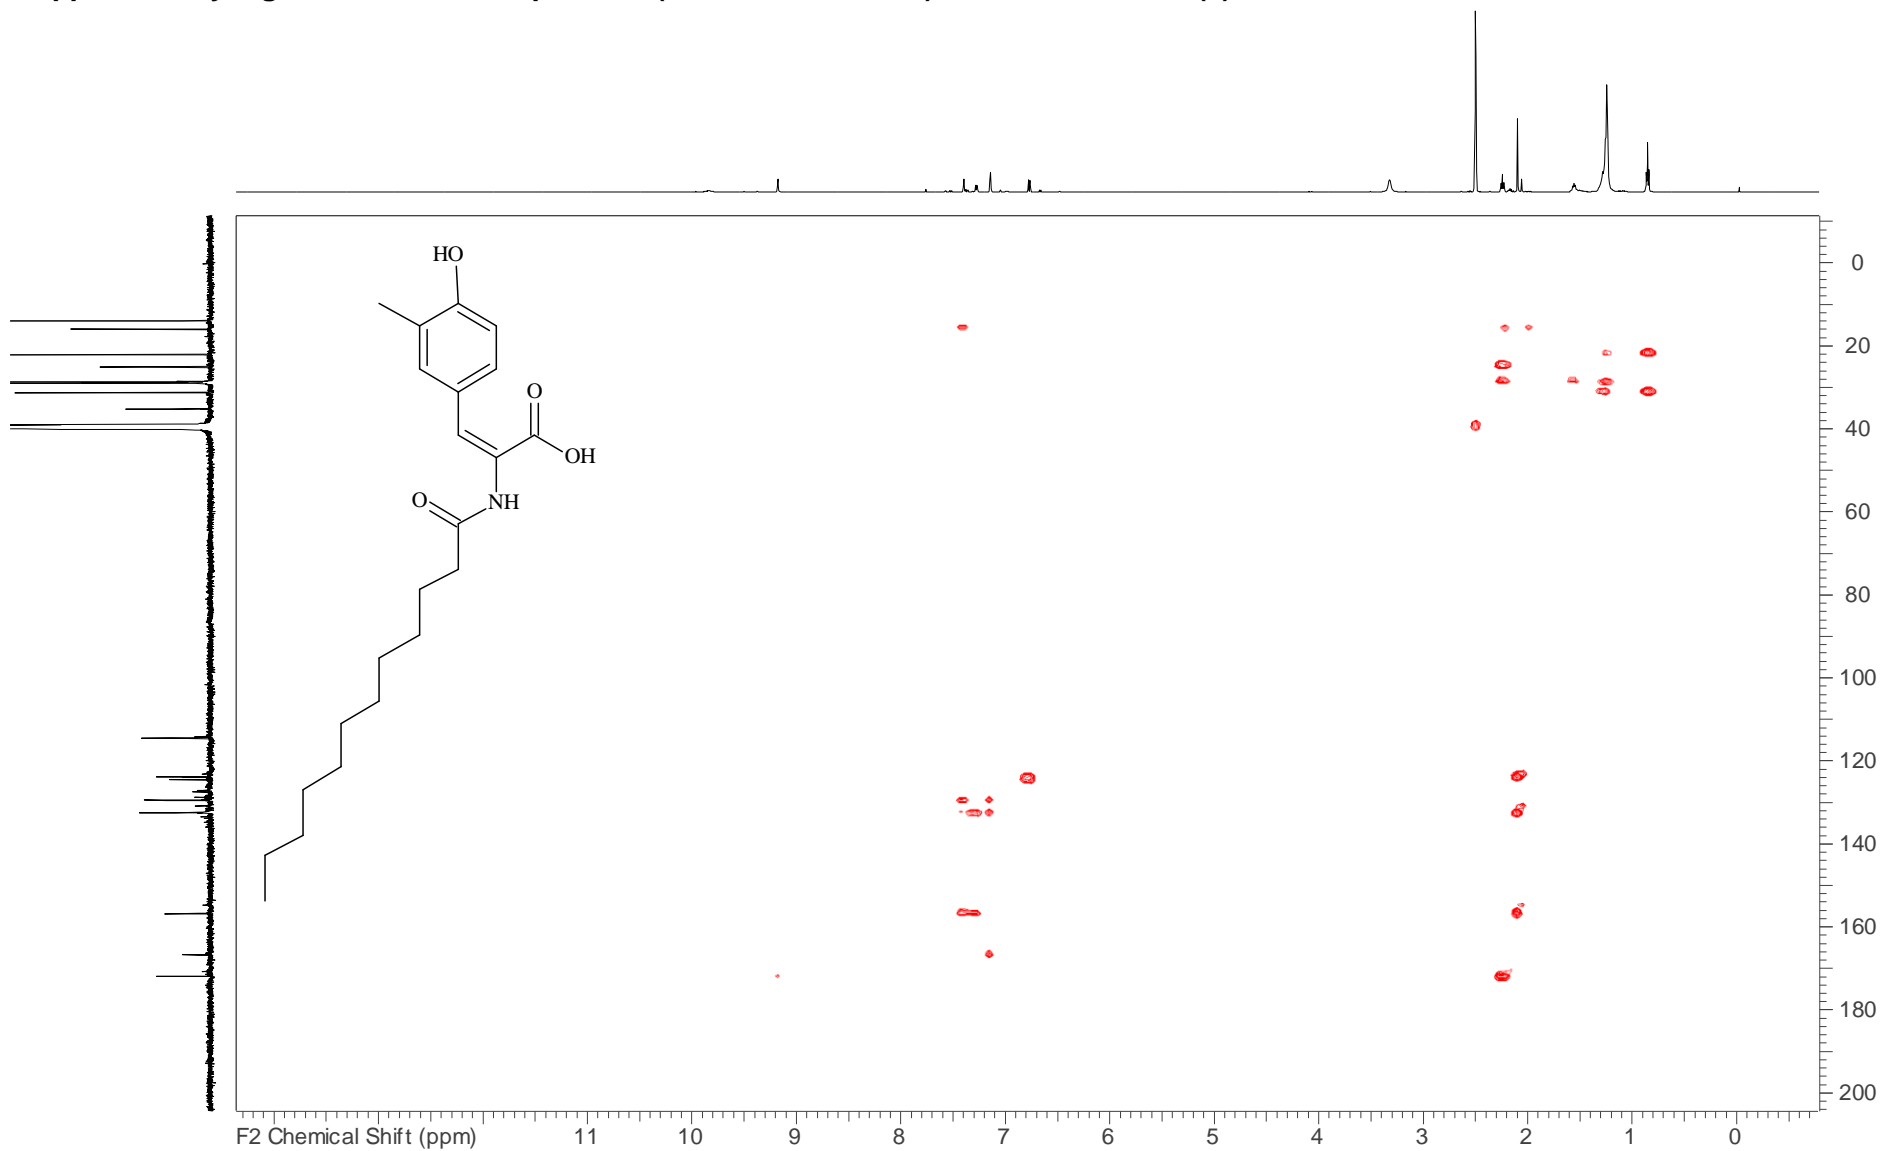

Supplementary Fig. 46. COSY NMR spectrum (500 MHz, DMSO- $d_6$ ) of stieleriaceine B<sub>2</sub> (5)

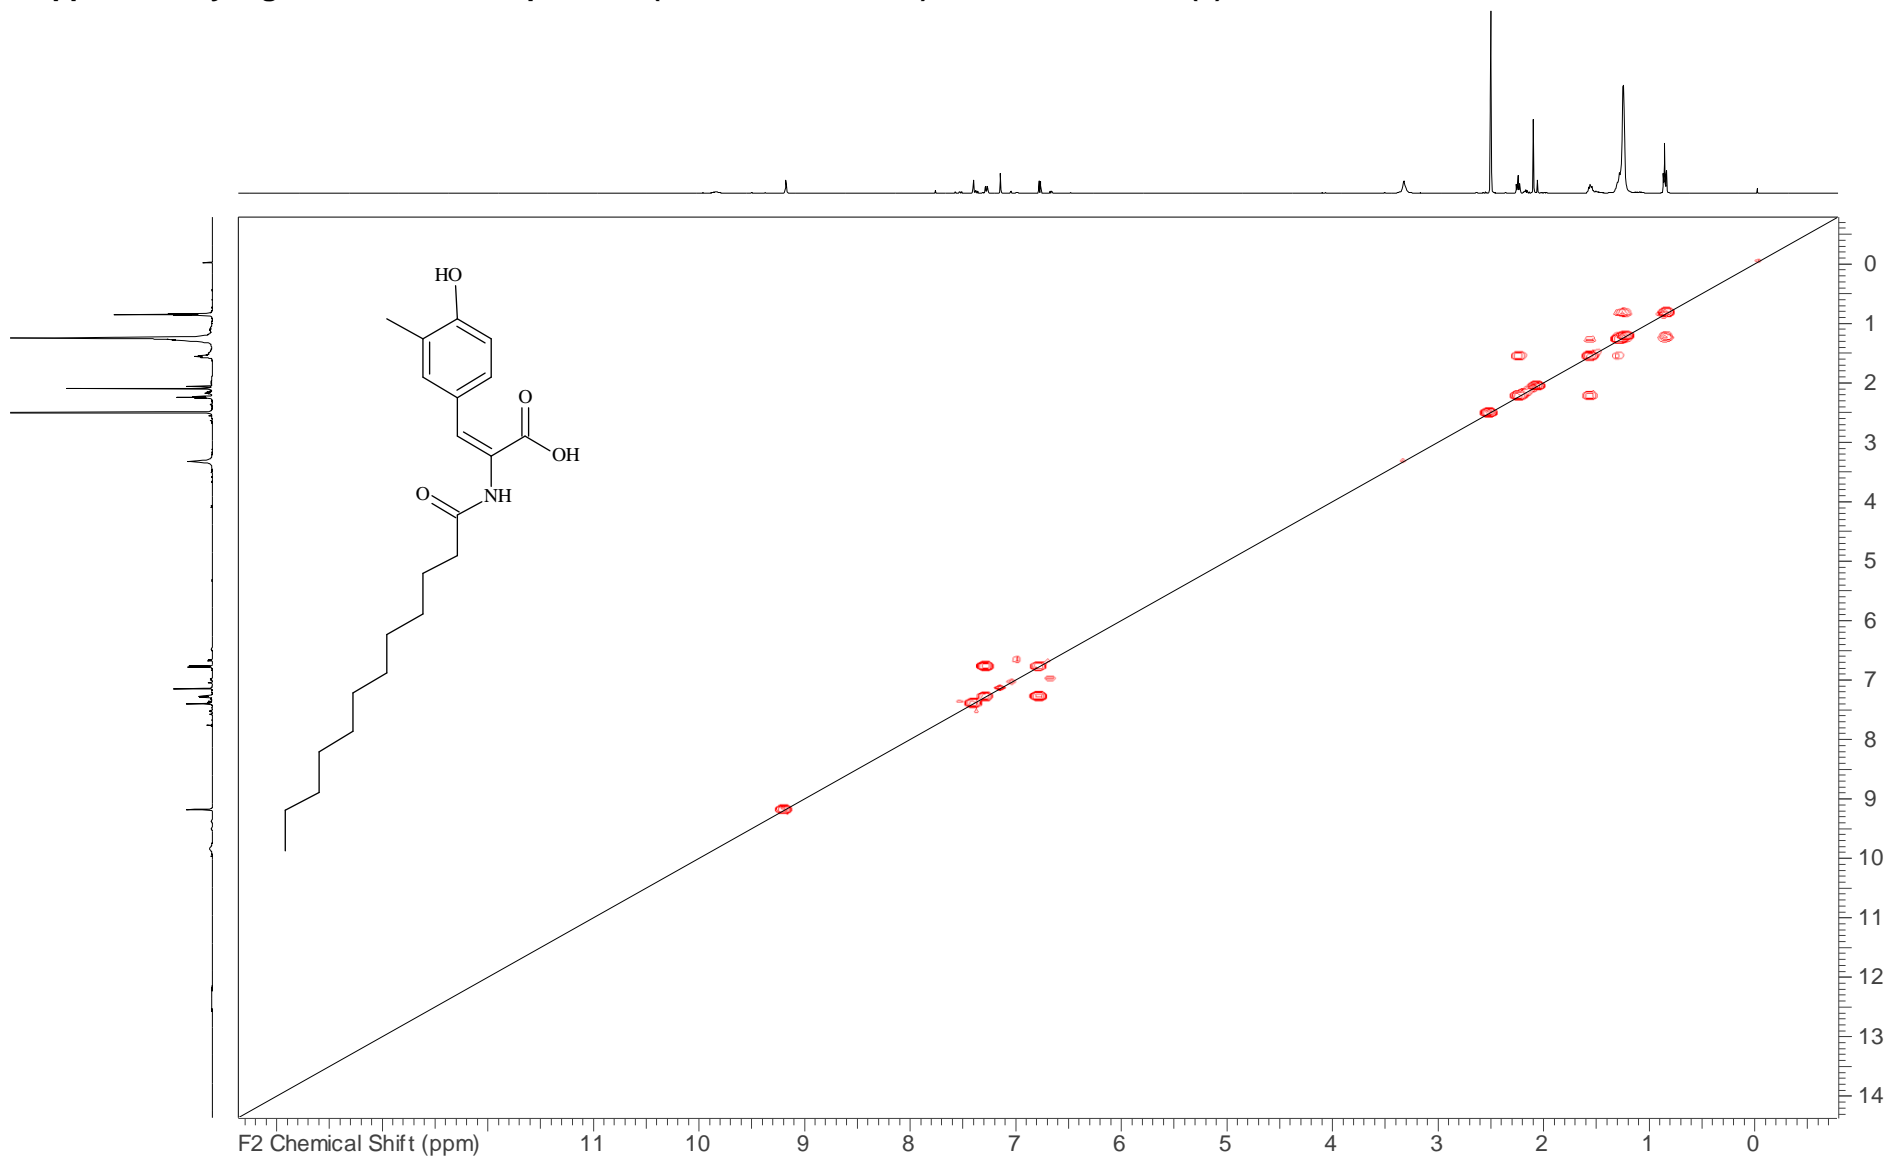

Supplementary Fig. 47. TOCSY NMR spectrum (500 MHz, DMSO- $d_6$ ) of stieleriaccine B<sub>2</sub> (5)

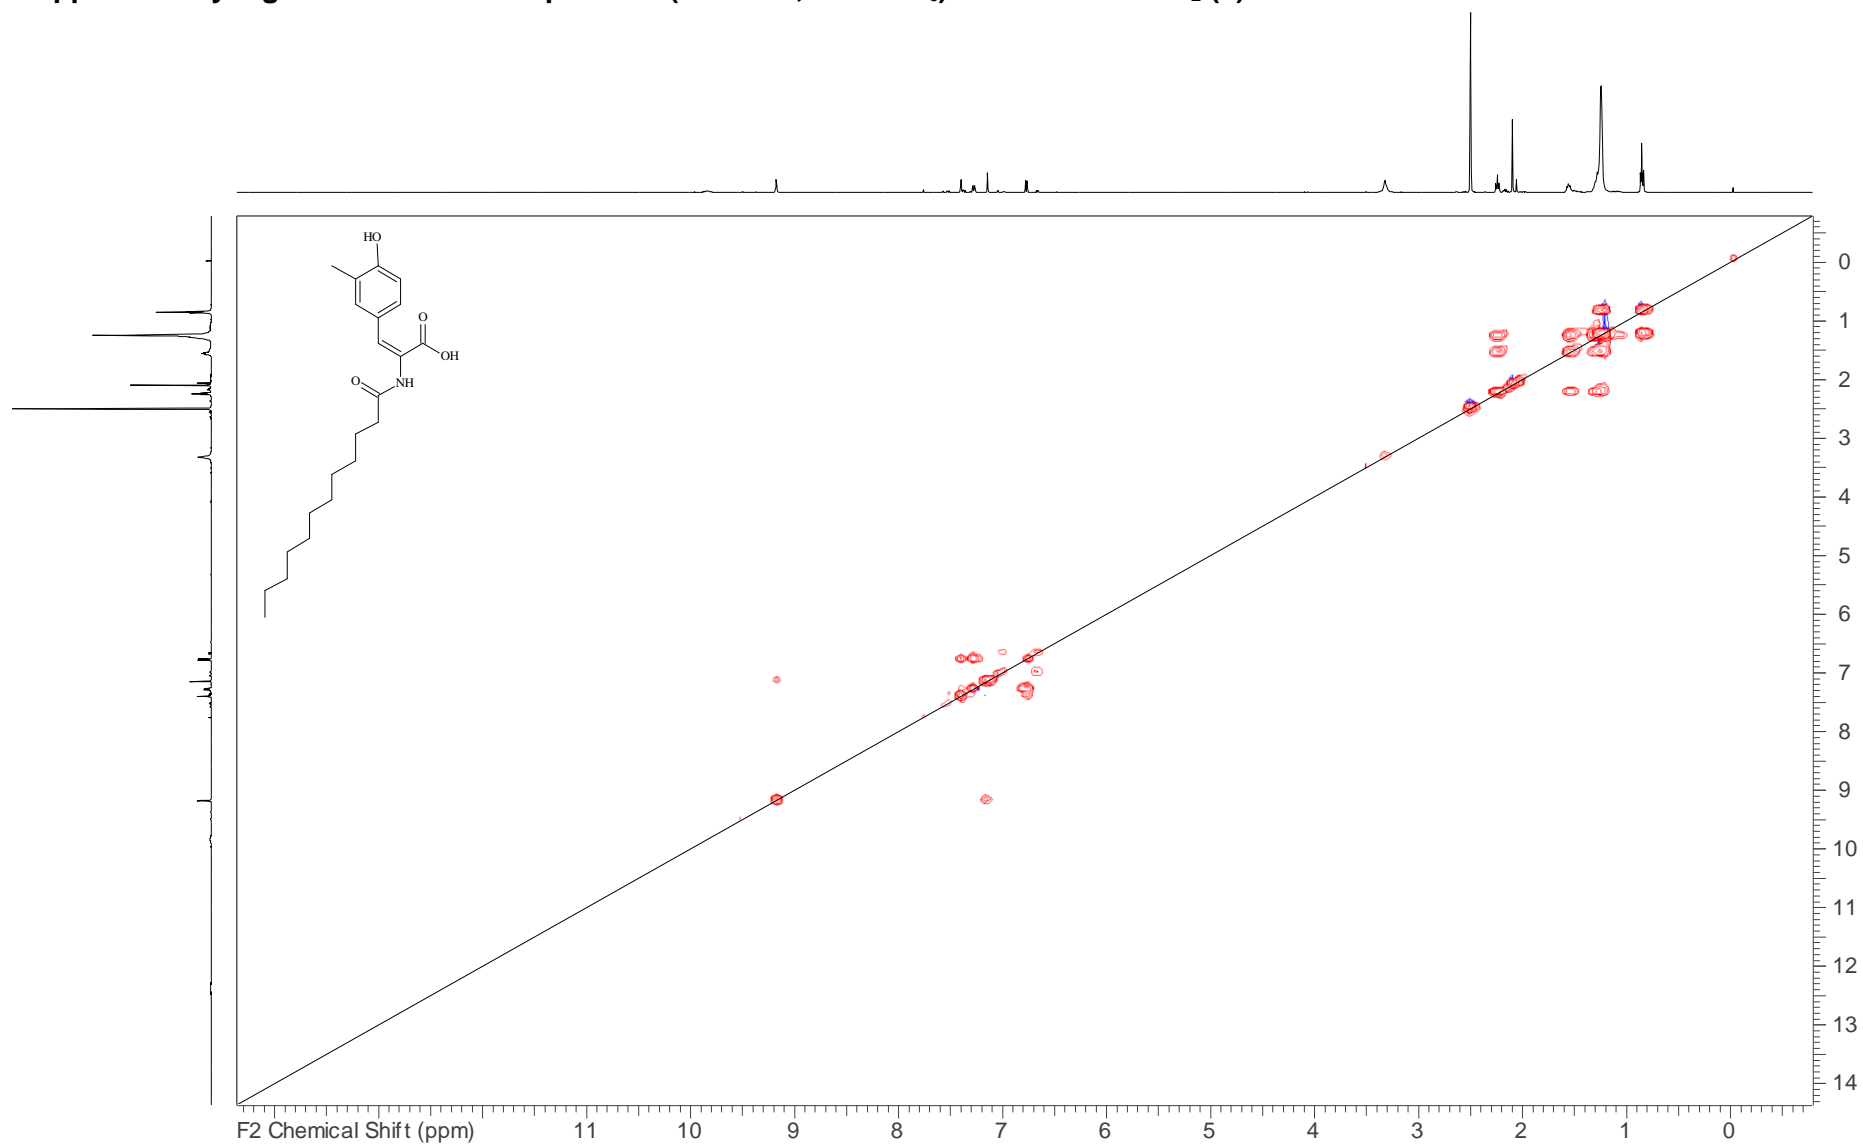

Supplementary Fig. 48. ROESY NMR spectrum (500 MHz, DMSO- $d_6$ ) of stieleriacine B<sub>2</sub> (5)

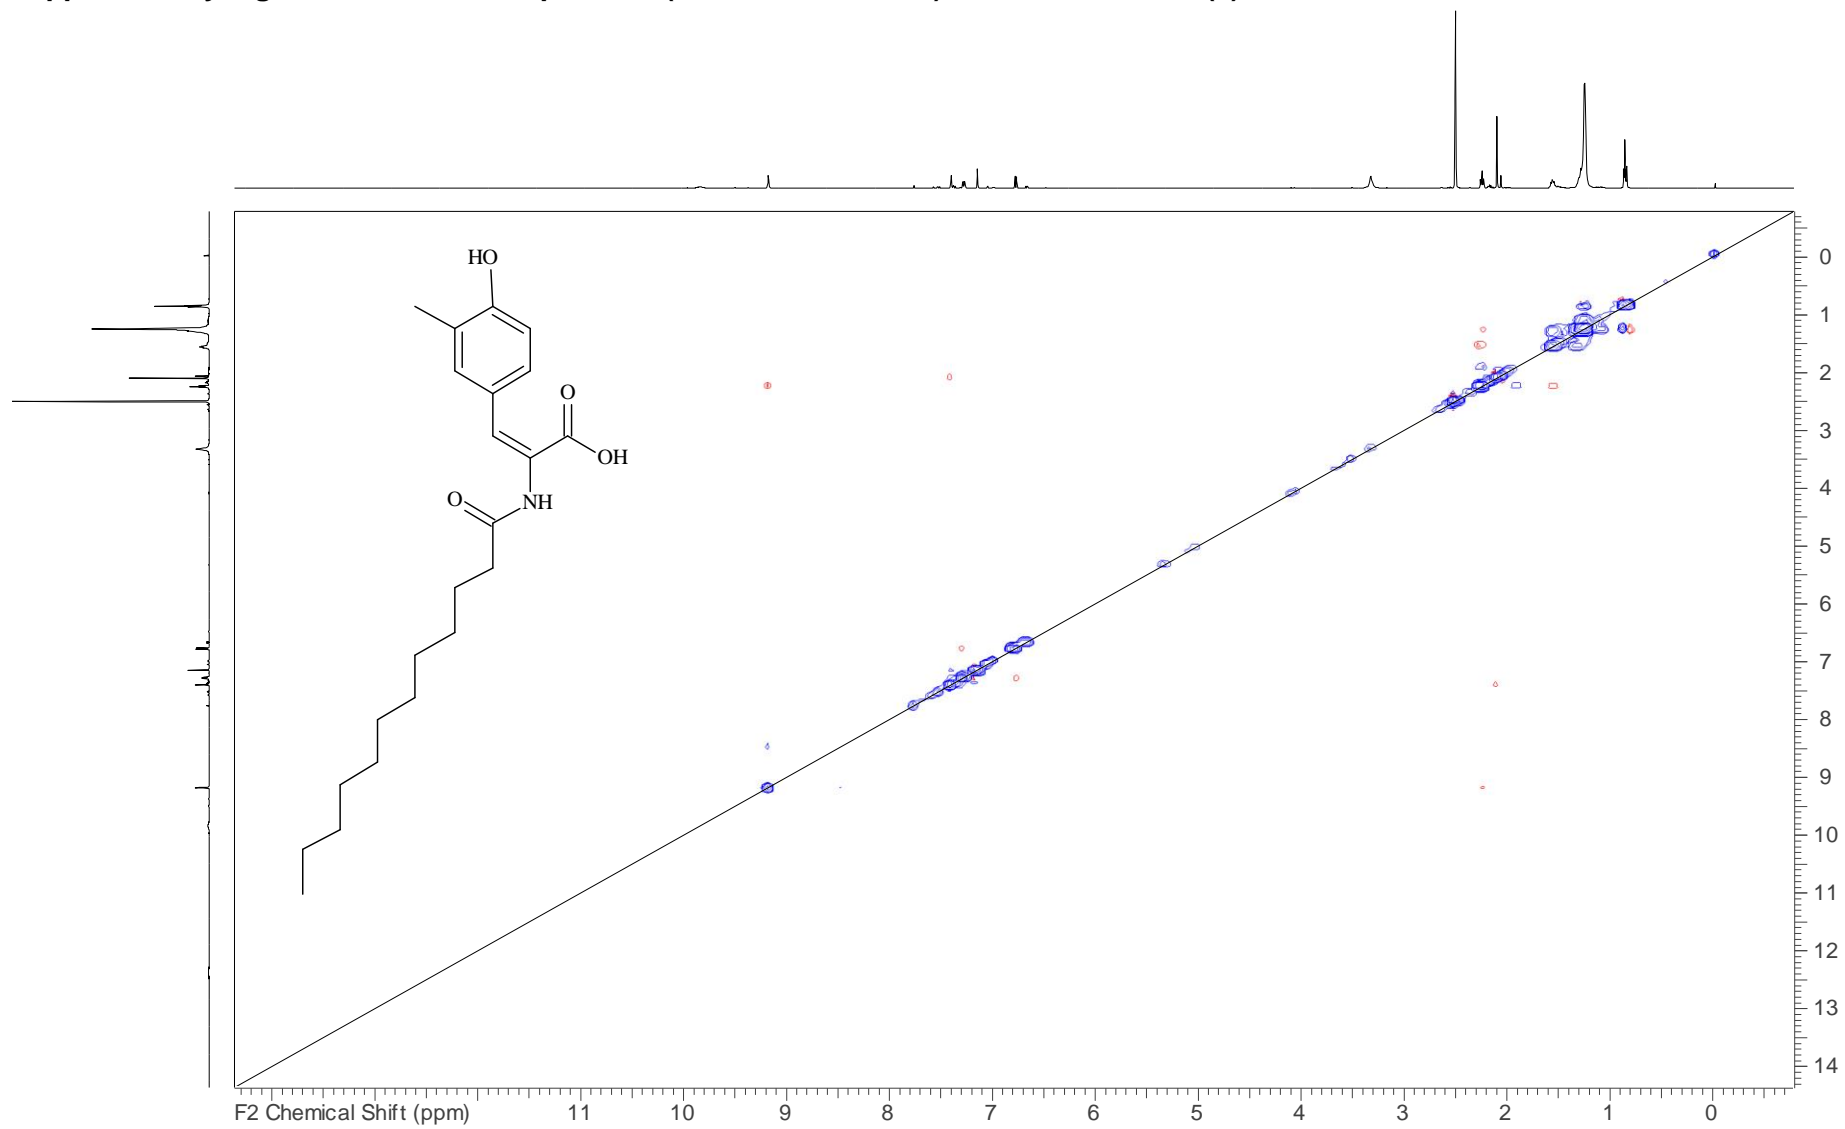



## Supplementary Tables

**Supplementary Table 1. Minimum inhibitory concentration (MIC) for bacteria, yeasts and fungi in µg/mL.** For MICs, a total of 2 µL and 20 µL of a 1 mg/mL stock solution (6.7 and 67 µg/ml) of **1 – 5** were tested. MeOH (20 µL) was tested as negative control and displayed no inhibitory effects. The following reference antimicrobials were used: [a] Oxytetracycline, [b] Gentamycin, [c] Kanamycin for bacteria; [e] Nystatin for yeasts and fungi; n. i. = no inhibition up to 100 µg/mL.

| Strain                                                  | Stieleriacine<br>A <sub>1</sub> (1) | Stieleriacine<br>B <sub>1</sub> (2) | Stieleriacine<br>C (3) | Stieleriacine<br>A <sub>2</sub> (4) | Stieleriacine<br>B <sub>2</sub> (5) | Reference<br>[a,b,c,d] |
|---------------------------------------------------------|-------------------------------------|-------------------------------------|------------------------|-------------------------------------|-------------------------------------|------------------------|
| <i>Bacillus subtilis</i><br>DSM 10                      | 50                                  | 67                                  | 67                     | 67                                  | 67                                  | 1.1 <sup>a</sup>       |
| <i>Escherichia coli</i><br>DSM 1116                     | n.i.                                | n.i.                                | n.i.                   | n.i.                                | n.i.                                | 3.4 <sup>a</sup>       |
| <i>Mucor plumbeus</i><br>MUCL49355                      | n.i.                                | n.i.                                | 50                     | n.i.                                | n.i.                                | 4.2 <sup>e</sup>       |
| <i>Candida tenuis</i><br>MUCL29892                      | n.i.                                | n.i.                                | n.i.                   | n.i.                                | n.i.                                | 6.8 <sup>e</sup>       |
| <i>Candida albicans</i><br>DSM1665                      | n.i.                                | n.i.                                | n.i.                   | n.i.                                | n.i.                                | 34 <sup>e</sup>        |
| <i>Pichia anomala</i><br>DSM 6766                       | n.i.                                | n.i.                                | n.i.                   | n.i.                                | n.i.                                | 8.4 <sup>e</sup>       |
| <i>Micrococcus luteus</i><br>DSM 1790                   | n.i.                                | 50                                  | n.i.                   | 50                                  | 100                                 | 0.8 <sup>a</sup>       |
| <i>Chromobacterium</i><br><i>violaceum</i><br>DSM 30191 | n.i.                                | n.i.                                | n.i.                   | n.i.                                | n.i.                                | 1.7 <sup>a</sup>       |
| <i>Pseudomonas aeruginosa</i><br>PA14                   | n.i.                                | n.i.                                | n.i.                   | n.i.                                | n.i.                                | 0.1 <sup>b</sup>       |
| <i>Mycobacterium smegmatis</i><br>ATCC 700084           | n.i.                                | n.i.                                | n.i.                   | n.i.                                | n.i.                                | 0.1 <sup>c</sup>       |
| <i>Schizosaccharomyces</i><br><i>pombe</i><br>DSM 70572 | n.i.                                | n.i.                                | n.i.                   | n.i.                                | n.i.                                | 8.4 <sup>e</sup>       |
| <i>Staphylococcus aureus</i><br>DSM 346                 | n.i.                                | n.i.                                | 67                     | 67                                  | 67                                  | 0.4 <sup>a</sup>       |
| <i>Rhodotorula glutinis</i><br>DSM 10134                | 67                                  | n.i.                                | n.i.                   | n.i.                                | n.i.                                | 2.1 <sup>e</sup>       |
| <i>Mucor hiemalis</i><br>DSM 2656                       | 67                                  | n.i.                                | n.i.                   | n.i.                                | n.i.                                | 17 <sup>e</sup>        |

**Supplementary Table 2. Duration of  $T_0$ ,  $T_1$ ,  $T_2$  and  $T_3$  for untreated Mal15<sup>T</sup> cells and cells treated with 1.34  $\mu\text{M}$  stieleriacine  $A_1$ .**  $T_0$  = duration of lag phase;  $T_1$  = duration of daughter cell formation until release,  $T_2$  = duration of the gap after daughter cell release ( $T_1$ ) until next daughter cell formation and  $T_3$  = complete reproduction cycle ( $T_1+T_2$ ). Experiments were performed in three biological replicates.

| Replicate | Treatment   | $T_0$ [min] | $T_1$ [min] | $T_2$ [min] | $T_3$ [min] | $T_3$ [h] |
|-----------|-------------|-------------|-------------|-------------|-------------|-----------|
|           |             | 1           | -           | 262.22      | 122.96      | 128.15    |
| 2         | -           | 485.56      | 113.33      | 142.22      | 255.56      | 4.26      |
| 3         | -           | 378.89      | 111.85      | 127.78      | 239.63      | 3.99      |
|           | $\emptyset$ | 375.56      | 116.05      | 132.72      | 248.77      | 4.15      |
|           | deviation   | 91.21       | 4.93        | 6.72        | 6.71        | 0.11      |
| 1         | $A_1$       | 201.11      | 124.07      | 125.19      | 249.26      | 4.15      |
| 2         | $A_1$       | 410.00      | 107.04      | 153.33      | 260.37      | 4.34      |
| 3         | $A_1$       | 318.89      | 116.67      | 134.07      | 250.74      | 4.18      |
|           | $\emptyset$ | 310.00      | 115.93      | 137.53      | 253.46      | 4.22      |
|           | deviation   | 85.51       | 6.98        | 11.75       | 4.93        | 0.08      |

**Supplementary Table 3. Gene annotation of the putative stieleriaine biosynthetic gene cluster (Mal15\_37240 to Mal15\_37430) and the region upstream (Mal15\_36520 to Mal15\_37230).**

| <b>Locus tag</b> | <b>Automated gene annotation</b>                                                                           |
|------------------|------------------------------------------------------------------------------------------------------------|
| Mal15_36520      | Tetraacyldisaccharide 4'-kinase                                                                            |
| Mal15_36530      | Iron-responsive transcriptional regulator                                                                  |
| Mal15_36540      | Hypothetical protein                                                                                       |
| Mal15_36550      | Hypothetical protein                                                                                       |
| Mal15_36560      | Hypothetical protein                                                                                       |
| Mal15_36570      | Serine-aspartate repeat-containing protein D precursor                                                     |
| Mal15_36580      | WD domain, G-beta repeat                                                                                   |
| Mal15_36590      | Hypothetical protein                                                                                       |
| Mal15_36600      | Transposase IS200 like protein                                                                             |
| Mal15_36610      | Transposase for transposon Tn5                                                                             |
| Mal15_36620      | Transposase for transposon Tn5                                                                             |
| Mal15_36630      | Chromosome partition protein Smc                                                                           |
| Mal15_36640      | Hypothetical protein                                                                                       |
| Mal15_36650      | Biopolymer transport protein ExbB                                                                          |
| Mal15_36660      | Biopolymer transport protein ExbD                                                                          |
| Mal15_36670      | Hypothetical protein                                                                                       |
| Mal15_36680      | Hypothetical protein                                                                                       |
| Mal15_36690      | FemAB family protein                                                                                       |
| Mal15_36700      | Hypothetical protein                                                                                       |
| Mal15_36710      | Hypothetical protein                                                                                       |
| Mal15_36720      | Transmembrane exosortase (Exosortase_EpsH)                                                                 |
| Mal15_36730      | Tyrosine-protein kinase YwqD                                                                               |
| Mal15_36740      | Tetratricopeptide repeat protein                                                                           |
| Mal15_36750      | Hypothetical protein                                                                                       |
| Mal15_36760      | UDP- <i>N</i> -acetylgalactosamine-undecaprenyl-phosphate <i>N</i> -acetylgalactosamine-phosphotransferase |
| Mal15_36770      | Peptidoglycan- <i>N</i> -acetylglucosamine deacetylase                                                     |
| Mal15_36780      | D-inositol-3-phosphate glycosyltransferase                                                                 |
| Mal15_36790      | Putative teichuronic acid biosynthesis glycosyltransferase TuaC                                            |
| Mal15_36800      | Phosphotransferase enzyme family protein                                                                   |
| Mal15_36810      | Sulfotransferase domain protein                                                                            |
| Mal15_36820      | Hypothetical protein                                                                                       |
| Mal15_36830      | Poly-beta-1,6- <i>N</i> -acetyl-D-glucosamine <i>N</i> -deacetylase precursor                              |
| Mal15_36840      | Heparinase II/III-like protein                                                                             |
| Mal15_36850      | Putative teichuronic acid biosynthesis glycosyltransferase TuaC                                            |
| Mal15_36860      | Hypothetical protein                                                                                       |
| Mal15_36870      | Hypothetical protein                                                                                       |
| Mal15_36880      | GDP-mannose 6-dehydrogenase                                                                                |
| Mal15_36890      | Low molecular weight protein-tyrosine-phosphatase etp                                                      |
| Mal15_36900      | Glycosyl transferases group 1                                                                              |
| Mal15_36910      | Bifunctional polymyxin resistance protein ArnA                                                             |
| Mal15_36920      | Hypothetical protein                                                                                       |
| Mal15_36930      | Hypothetical protein                                                                                       |
| Mal15_36940      | Peptidoglycan <i>O</i> -acetyltransferase                                                                  |

| <b>Locus tag</b> | <b>Automated gene annotation</b>                                                                 |
|------------------|--------------------------------------------------------------------------------------------------|
| Mal15_36950      | Long-chain-fatty-acid--CoA ligase                                                                |
| Mal15_36960      | D-alanine--poly(phosphoribitol) ligase subunit 2                                                 |
| Mal15_36970      | L-glutamyl-[Btrl acyl-carrier protein] decarboxylase                                             |
| Mal15_36980      | Hypothetical protein                                                                             |
| Mal15_36990      | Hypothetical protein                                                                             |
| Mal15_37000      | Putative glycosyltransferase EpsH                                                                |
| Mal15_37010      | Putative oxidoreductase YcjS                                                                     |
| Mal15_37020      | Hypothetical protein                                                                             |
| Mal15_37030      | O-Antigen ligase                                                                                 |
| Mal15_37040      | Undecaprenyl-phosphate 4-deoxy-4-formamido-L-arabinose transferase                               |
| Mal15_37050      | Hypothetical protein                                                                             |
| Mal15_37060      | Teichoic acid translocation permease protein TagG                                                |
| Mal15_37070      | Teichoic acids export ATP-binding protein TagH                                                   |
| Mal15_37080      | 3-deoxy-manno-octulosonate cytidylyltransferase                                                  |
| Mal15_37090      | <i>N,N</i> -diacetyllegionaminic acid synthase                                                   |
| Mal15_37100      | Putative glycosyltransferase EpsE                                                                |
| Mal15_37110      | Hyaluronan synthase                                                                              |
| Mal15_37120      | Hypothetical protein                                                                             |
| Mal15_37130      | Hypothetical protein                                                                             |
| Mal15_37140      | Hypothetical protein                                                                             |
| Mal15_37150      | tRNA (mo5U34)-methyltransferase                                                                  |
| Mal15_37160      | bifunctional 3-demethylubiquinone-9 3-methyltransferase/ 2-octaprenyl-6-hydroxy phenol methylase |
| Mal15_37170      | Hemolysin, chromosomal                                                                           |
| Mal15_37180      | Kynurenine formamidase                                                                           |
| Mal15_37190      | Beta-monoglucosyldiacylglycerol synthase                                                         |
| Mal15_37200      | Poly-beta-1,6- <i>N</i> -acetyl-D-glucosamine synthase                                           |
| Mal15_37210      | hypothetical protein                                                                             |
| Mal15_37220      | O-Antigen ligase                                                                                 |
| Mal15_37230      | O-acetyltransferase OatA                                                                         |
| Mal15_37240      | Fatty acid desaturase                                                                            |
| Mal15_37250      | Carminomycin 4-O-methyltransferase                                                               |
| Mal15_37260      | tRNA threonylcarbamoyladenosine dehydratase                                                      |
| Mal15_37270      | Serine-aspartate repeat-containing protein D precursor                                           |
| Mal15_37280      | Serine-aspartate repeat-containing protein D precursor                                           |
| Mal15_37290      | Hypothetical protein                                                                             |
| Mal15_37300      | PEP-CTERM motif protein                                                                          |
| Mal15_37310      | Hypothetical protein                                                                             |
| Mal15_37320      | Hypothetical protein                                                                             |
| Mal15_37330      | 3-oxoacyl-[acyl-carrier-protein] synthase 2                                                      |
| Mal15_37340      | Hypothetical protein                                                                             |
| Mal15_37350      | Hypothetical protein                                                                             |
| Mal15_37360      | Transcriptional regulatory protein DegU                                                          |
| Mal15_37370      | Hypothetical protein                                                                             |
| Mal15_37380      | Hypothetical protein                                                                             |
| Mal15_37390      | Putative efflux pump membrane fusion protein                                                     |
| Mal15_37400      | Cobalt-zinc-cadmium resistance protein CzcA                                                      |

| <b>Locus tag</b> | <b>Automated gene annotation</b>             |
|------------------|----------------------------------------------|
| Mal15_37410      | Putative efflux pump membrane fusion protein |
| Mal15_37420      | Cobalt-zinc-cadmium resistance protein CzcA  |
| Mal15_37430      | Hypothetical protein                         |

**Supplementary Table 4. Carbon sources utilised by strain Mal15<sup>T</sup>.**

+ = positive; W = weakly positive

| <b>Carbon sources</b>            |   |
|----------------------------------|---|
| Acetic acid                      | W |
| <i>N</i> -Acetyl-D-galactosamine | + |
| <i>N</i> -Acetyl-D-glucosamine   | + |
| L-Arabinose                      | + |
| D-Cellobiose                     | + |
| Dextrin                          | W |
| L-Fucose                         | + |
| D-Fructose                       | + |
| D-Galactose                      | + |
| D-Galactonic acid lacton         | W |
| Gentiobiose                      | + |
| $\alpha$ -D-Glucose              | + |
| D-Glucose- 6-phosphate           | W |
| D-Gluconic acid                  | + |
| Glucuronamide                    | + |
| D-Glucuronic acid                | + |
| $\alpha$ -Ketoglutaric acid      | W |
| $\alpha$ -D-Lactose              | + |
| Lactulose                        | + |
| Maltose                          | W |
| D-Mannose                        | + |
| D-Mannitol                       | W |
| D-Melibiose                      | + |
| $\beta$ -Methyl-D-Glucoside      | + |
| D-Raffinose                      | + |
| L-Rhamnose                       | + |
| Sucrose                          | + |
| D-Trehalose                      | + |
| Turanose                         | + |
| D-Psicose                        | + |

**Supplementary Table 5. Enzymatic activities of strain Mal15<sup>T</sup>, determined with APIZYM test. Results: + positive; – negative**

| <b>Enzymatic activity</b>          |   |
|------------------------------------|---|
| Alkaline phosphatase               | + |
| Esterase (C4)                      | + |
| Esterase lipase (C8)               | + |
| Lipase (C14)                       | – |
| Leucine arylamidase                | + |
| Valine arylamidase                 | + |
| Cysteine arylamidase               | – |
| Trypsin                            | – |
| α-Chymotrypsin                     | – |
| Acid phosphatase                   | + |
| Naphthol-AS-BI-phosphohydrolase    | + |
| α-Galactosidase                    | – |
| β-Galactosidase                    | – |
| β-Glucuronidase                    | – |
| α-Glucosidase                      | – |
| β-Glucosidase                      | – |
| <i>N</i> -Acetyl-β-glucosaminidase | – |
| α-Mannosidase                      | – |
| α-Fucosidase                       | – |

## Supplementary Notes

### Phylogenetic inference

In phylogenetic trees obtained after 16S rRNA gene sequence comparison and whole genome-based multilocus sequence analysis (MLSA), strain Mal15<sup>T</sup> clusters within the family *Pirellulaceae*, order *Pirellulales*, class *Planctomycetia*, phylum *Planctomycetes* (Supplementary Fig. 2). Within its family, strain Mal15<sup>T</sup> clusters stably with the genera of *Rhodopirellula*, *Rubripirellula*, *Novipirellula* and *Crateriforma* without revealing any current genus as current closest neighbour. Analysis of 16S rRNA gene sequence similarity (Supplementary Fig. 3) shows that all minimal identities between strain Mal15<sup>T</sup> and the four other genera are below the threshold of 94.5% that would put strain Mal15<sup>T</sup> in any of these taxa<sup>1</sup>. The same is true for the analysis of *rpoB* nucleotide sequences identity (genus threshold of 75.5-78.0%)<sup>2</sup>, average amino acid identity (genus threshold of 60-80%)<sup>3</sup> and percentage of conserved proteins (genus threshold of 50%)<sup>4</sup> (Supplementary Fig. 3). The only exception was observed during comparison of strain Mal15<sup>T</sup> with the genus *Crateriforma*, for which the values of *rpoB* nucleotide sequences identities and percentage of conserved proteins are slightly above the threshold. Nevertheless, strain Mal15<sup>T</sup> and *Crateriforma conspicua* do not cluster monophyletically in any phylogenetic tree (Supplementary Fig. 2) and it is therefore unlikely that they belong to the same genus. Taken together, the different methods suggest that strain Mal15<sup>T</sup> represents a novel species within a novel genus in the family *Pirellulaceae*, for which we propose the name *Stieleria maiorica* gen. nov., sp. nov. Strain Mal15<sup>T</sup> (DSM 100215<sup>T</sup> = LMG 29790<sup>T</sup>) is the type strain of the novel species and *Stieleria maiorica* is introduced as type species of the novel genus.

### Morphological Characterisation

Cells of strain Mal15<sup>T</sup> were investigated using light microscopic and electron microscopic analysis (Supplementary Fig. 4), revealing round to pear-shaped cells with a smooth surface, which form chains or rosettes. Cells are 1.9±0.2 x 1.4±0.2 µm in size (Supplementary Fig. 4).

Colonies appear smooth, round and are pink-coloured on solid medium. Cells are motile swimmers in liquid cultures. When strain Mal15<sup>T</sup> is grown under constant agitation (80 rpm), stirring or highly aerated, cells produce an extracellular matrix. Strain Mal15<sup>T</sup> divides by polar budding.

### **Physiological Characterisation**

Strain Mal15<sup>T</sup> is an aerobic heterotroph. Compared to other planctomycetes characterised so far (typical  $\mu_{\max}$  of 0.01-0.08 h<sup>-1</sup>), strain Mal15<sup>T</sup> is fast-growing. It reaches a maximal growth rate of 0.093 h<sup>-1</sup> (generation time of 7.5 h) (Supplementary Fig. 5). Determination of the growth rates at different temperatures revealed a mesophilic growth profile with growth from 11 °C to 37 °C with 35 °C as optimal growth temperature (Supplementary Fig. 5a). Measurements at different pH at 35 °C revealed growth in the range of pH 5.5-9.0 with an optimum at pH 7.5 (Supplementary Fig. 5b). Strain Mal15<sup>T</sup> was found to be oxidase-negative and catalase-positive. A conventional Gram stain was not possible for the strain as described previously for planctomycetes<sup>5</sup>. The Biolog GN2 MicroLog test showed that strain Mal15<sup>T</sup> is capable to utilise a variety of carbon sources (Supplementary Table 4). In particular sugars, such as *N*-acetyl-D-galactosamine, *N*-acetyl-D-glucosamine, L-arabinose, D-cellobiose, L-fucose, D-fructose, D-galactose, gentiobiose,  $\alpha$ -D-glucose, D-gluconic acid, glucuronamide, D-glucuronic acid,  $\alpha$ -D-lactose, lactulose, D-mannose, D-melibiose,  $\beta$ -methyl- D-glucoside, D-raffinose, L-rhamnose, sucrose, D-trehalose, turanose and D-psicose appear to be preferred carbon sources. Acetic acid, dextrin, D-galactonic acid lactone, D-glucose-6-phosphate,  $\alpha$ -ketoglutaric acid, maltose, and D-mannitol showed weak reactions, but still over 25% in both biological replicates (Supplementary Table 5). The APIZYM method revealed the following enzyme repertoire: alkaline phosphatase, esterase (C4), esterase lipase (C8), leucine arylamidase, valine arylamidase, acid phosphatase and naphthol-AS-BI-phosphohydrolase (Supplementary Table 6).



## Genome Analysis

The complete chromosome of strain Mal15<sup>T</sup> comprises 9,894,293 bp and has a G+C content of 59.3%. Annotation with Prokka revealed 7,016 annotated genes in its genome, of which 6,920 were identified as putative protein-coding genes. As known for other planctomycetes<sup>6</sup>, only for 42% of these genes a function could be predicted, while the remaining 2,899 genes were annotated as hypothetical proteins or proteins with unknown function. Moreover, 7 rRNA (3x 16S, 2x 23S, 2x 5S) and 81 tRNA entries were annotated. The genomic features of strain Mal15<sup>T</sup> are summarised in Supplementary Fig. 6. As planctomycetes are presumed to be valuable sources for the discovery of novel bioactive secondary metabolites<sup>7-9</sup>, the genome of Mal15<sup>T</sup> was scanned thereupon using antiSMASH version 3.0.5<sup>10</sup>. In total, seven secondary metabolite-associated gene clusters were identified. Like most planctomycetes, the genome of Mal15<sup>T</sup> harbors one terpene-related cluster<sup>7,8,11</sup>. The remaining six clusters are related to thiotemplate modular systems (TMS) including nonribosomal peptide synthetases (NRPS) and polyketide synthases (PKS). Interestingly, one of these clusters represents a hybrid TMS cluster related to NRPS and PKS. TMS clusters are known to be associated with the production of numerous small bioactive molecules of medical importance<sup>12</sup>. However, most secondary metabolite-related genes or clusters are known to be silent under axenic laboratory cultivation conditions<sup>13-15</sup>, which can be also assumed for planctomycetal secondary metabolite clusters<sup>7</sup>.

## Description of *Stieleria* gen. nov.

*Stieleria* (*Stie.le'ri.a'* N.L. fem. n. *Stieleria* named in honor of Anja Heuer, née Stieler, an extraordinary skilled German technician at the Leibniz Institute DSMZ, who played a key role in the cultivation of literally hundreds of novel planctomycetal strains). The round to pear-shaped cells with a smooth cell surface form rosettes or short chains. Cells reproduce by polar budding. In liquid culture, they produce an extracellular matrix which interconnects cells in aggregates. Daughter cells are motile, whereas mother cells are non-motile. The lifestyle is heterotrophic, obligatory aerobic, mesophilic and neutrophilic. The genus belongs to the

phylum *Planctomycetes*, class *Planctomycetia*, order *Pirellulales*, family *Pirellulaceae*. The type species is *Stieleria maiorica*.

#### **Description of *Stieleria maiorica* sp. nov.**

*Stieleria maiorica* (*ma'i.ori.ca'* N.L. fem. adj. *maiorica*, pertaining to the island Mallorca, Spain, on which the type strain was isolated). In addition to the features described above the species exhibits the following properties: Colonies are pink-coloured on solid medium. Cells are  $1.9\pm 0.2 \times 1.4\pm 0.2 \mu\text{m}$  in size. Motile daughter cells originate through budding from sessile mother cells. Gram staining delivers no clear results. The oxidase assay was negative while the catalase assay was positive. The organism can degrade a wide range of carbon sources. In particular, strong signals were observed for *N*-acetyl-D-galactosamine, *N*-acetyl-D-glucosamine, L-arabinose, D-cellobiose, L-fucose, D-fructose, D-galactose, gentiobiose,  $\alpha$ -D-glucose, D-gluconic acid, glucuronamide, D-glucuronic acid,  $\alpha$ -D-lactose, lactulose, D-mannose, D-melibiose,  $\beta$ -methyl-D-glucoside, D-raffinose, L-rhamnose, sucrose, D-trehalose, turanose and D-psicose while for the carbon sources acetic acid, dextrin, D-galactonic acid lactone, D-glucose-6-phosphate,  $\alpha$ -ketoglutaric acid, maltose, D-mannitol only weak signals were detected. The enzyme repertoire includes alkaline phosphatase, esterase (C4), esterase lipase (C8), leucine arylamidase, valine arylamidase, acid phosphatase and naphthol-AS-BI-phosphohydrolase. Growth of the type strain occurs between pH 5.5 and 9.0 with an optimum at pH 7.5. The optimal growth temperature of the type strain turned out to be 35 °C, but cells also grew over a range from 11 °C to 37 °C. The complete chromosome of the type strain comprises 9,894,293 bp, with a G+C content of 59.3%. The type strain is Mal15<sup>T</sup> (DSM 100215<sup>T</sup> = LMG 29790<sup>T</sup>), which was isolated from seawater sediment on Mallorca island, Spain.

#### **Compound information for Stieleriocines**

**Stieleriocine A<sub>1</sub> (1)** (Supplementary Figs. 9-16). (*Z* isomer); off-white, amorphous powder; UV (MeOH)  $\lambda_{\text{max}}$  (log  $\epsilon$ ) 200 (2.6), 314 (2.2) nm. HRESIMS *m/z* 374.2325 [M+H]<sup>+</sup> (calcd for

$C_{22}H_{31}NO_4$ , 373.2253).  $^1H$  NMR (700MHz, DMSO- $d_6$ )  $\delta$  = 9.82 (1H, s, C-OH-7), 9.29 (1H, s, NH), 7.35 (1H, d,  $J$  = 1.7 Hz, H-9), 7.28 (1H, dd,  $J$  = 8.4 Hz, 1.9 Hz, H-5), 7.17 (1H, s, H-3), 6.77 (1H, d,  $J$  = 8.4 Hz, H-6), 6.69 (1H, dt,  $J$  = 15.4 Hz, 6.9 Hz, H-3'), 6.11 (1H, d,  $J$  = 15.5 Hz, H-2'), 2.18 (2H, q,  $J$  = 1.0 Hz, H-4'), 2.08 (3H, m, H-10), 1.43 (2H, tquin,  $J$  = 7.3 Hz, 1.0 Hz, H-5'), 1.26 (14H, m, H-6', 7', 8', 9', 10', 11'), 0.85 (3H, dt,  $J$  = 14.6 Hz, 7.1 Hz, H-12').  $^{13}C$  NMR (176MHz, DMSO- $d_6$ )  $\delta$  = 166.6 (C-1), 164.4 (C-1'), 156.9 (C-7), 144.2 (C-3'), 132.7 (C-9), 132.6 (C-3), 129.3 (C-5), 124.5 (C-4), 123.9 (C-8), 123.8 (C-2'), 123.6 (C-2), 114.6 (C-6), 31.3 (C-4'), 31.3 (C-10'), 29.0 - 28.6 (C-6', 7', 8', 9'), 27.8 (C-5'), 22.1 (C-11'), 16.0 (C-10), 14.0 (C-12').

**Stieleriacine B<sub>1</sub> (2)** (Supplementary Figs. 17-24). (*Z* isomer); off-white, amorphous powder; UV (MeOH)  $\lambda_{max}$  (log  $\epsilon$ ) 201 (1.5), 227 (1.4), 310 (1.6) nm. HRESIMS  $m/z$  376.2490  $[M+H]^+$  (calcd for  $C_{22}H_{33}NO_4$ , 375.2409).  $^1H$  NMR (500MHz, DMSO- $d_6$ )  $\delta$  = 9.13 (1H, br s, NH), 7.37 (1H, s, H-9), 7.25 (1H, d,  $J$  = 7.6 Hz, H-5), 7.12 (1H, s, H-3), 6.76 (1H, d,  $J$  = 8.2 Hz, H-6), 2.24 (2H, t,  $J$  = 7.3 Hz, H-2'), 2.09 (3H, s, H-10), 1.55 (2H, m, H-3'), 1.26 (16H, m, H-4', 5', 6', 7', 8', 9', 10', 11'), 0.86 (3H, t,  $J$  = 7.2 Hz, H-12').  $^{13}C$  NMR (126MHz, DMSO- $d_6$ )  $\delta$  = 171.7 (C-1'), 167.0 (C-1), 156.6 (C-7), 132.4 (C-9), 131.7 (C-3), 129.4 (C-5), 124.8 (C-4), 123.7 (C-8, 2), 114.5 (C-6), 35.3 (C-2'), 31.3 (C-10'), 29.0 - 28.7 (C-4', 5', 6', 7', 8', 9'), 25.1 (C-3'), 22.1 (C-11'), 16.0 (C-10), 13.9 (C-12').

**Stieleriacine C (3)** (Supplementary Figs. 25-32). Light yellow amorphous solid;  $[\alpha]_D^{21}$  -28 ( $c$  = 1,  $CH_3OH$ ); UV (MeOH)  $\lambda_{max}$  (log  $\epsilon$ ) 202 (1.8), 227 (1.3), 279 (0.8), 312 (0.2) nm. HRESIMS  $m/z$  378.2653  $[M+H]^+$  (calcd for  $C_{22}H_{35}NO_4$ , 377.2566).  $^1H$  NMR (700MHz, DMSO- $d_6$ )  $\delta$  = 7.86 (1H, br s, NH), 6.86 (1H, s, H-9), 6.79 (1H, dd,  $J$  = 8.2 Hz, 1.8 Hz, H-5), 6.62 (1H, d,  $J$  = 8.0 Hz, H-6), 4.26 (1H, m, H-2), 2.87 (1H, dd,  $J$  = 13.8 Hz, 5.0 Hz, H-3a), 2.68 (1H, dd,  $J$  = 13.8 Hz, 9.1 Hz, H-3b), 2.05 (3H, s, H-10), 2.02 (2H, td,  $J$  = 7.3 Hz, 2.5 Hz, H-2'), 1.39 (2H, m, H-3'), 1.22 (14H, m, H-5', 6', 7', 8', 9', 10', 11'), 1.14 (2H, m, H-4'), 0.85 (3H, t,  $J$  = 7.0 Hz, H-12').  $^{13}C$  NMR (176MHz, DMSO- $d_6$ )  $\delta$  = 173.3 (C-1), 171.9 (C-1'), 153.8 (C-7),

131.3 (C-9), 127.8 (C-4), 127.1 (C-5), 123.1 (C-8), 114.2 (C-6), 53.9 (C-2), 36.1 (C-3), 35.2 (C-2'), 31.3 (C-10'), 29.0 - 28.7 (C-5', 6', 7', 8', 9'), 28.5 (C-4'), 25.2 (C-3'), 22.1 (C-11'), 16.0 (C-10), 13.9 (C-12')

**Stieleriacine A<sub>2</sub> (4)** (Supplementary Figs. 33-40). (*E* isomer); off-white, amorphous powder; UV (MeOH)  $\lambda_{\max}$  (log  $\epsilon$ ) 210 (1.6), 314 (1.6) nm. HRESIMS  $m/z$  374.2336 [M+H]<sup>+</sup> (calcd for C<sub>22</sub>H<sub>31</sub>NO<sub>4</sub>, 373.2253). <sup>1</sup>H NMR (500MHz, DMSO-d<sub>6</sub>)  $\delta$  = 9.28 (1H, s, NH), 7.34 (1H, s, H-9), 7.28 (1H, dd, J = 8.3 Hz, 1.9 Hz, H-5), 7.17 (1H, s, H-3), 6.78 (1H, d, J = 8.4 Hz, H-6), 6.69 (1H, m, H-3'), 6.12 (1H, d, J = 15.4 Hz, H-2'), 2.18 (2H, m, H-4'), 2.09 (3H, s, H-10), 1.44 (2H, m, H-5'), 1.28 (14H, m, H-5', 6', 7', 8', 9', 10', 11'), 0.87 (3H, t, J = 6.6 Hz, H-12'). <sup>13</sup>C NMR (126MHz, DMSO-d<sub>6</sub>)  $\delta$  = 166.7 (C-1), 164.3 (C-1'), 156.8 (C-7), 144.1 (C-3'), 132.7 (C-9), 132.2 (C-3), 129.2 (C-5), 124.6 (C-4), 123.8 (C-8, 2, 2'), 114.6 (C-6), 31.3 (C-4'), 31.3 (C-10'), 29.0 - 28.6 (C-6', 7', 8', 9'), 27.8 (C-5'), 22.1 (C-11'), 16.0 (C-10), 13.9 (C-12').

**Stieleriacine B<sub>2</sub> (5)** (Supplementary Figs. 41-48). (*E* isomer); off-white, amorphous powder; UV (MeOH)  $\lambda_{\max}$  (log  $\epsilon$ ) 202 (1.6), 310 (1.5) nm. HRESIMS  $m/z$  376.2498 [M+H]<sup>+</sup> (calcd for C<sub>22</sub>H<sub>33</sub>NO<sub>4</sub>, 375.2409). <sup>1</sup>H NMR (500MHz, DMSO-d<sub>6</sub>)  $\delta$  = 9.18 (1H, s, NH), 7.40 (1H, m, H-9), 7.28 (1H, dd, J = 8.3 Hz, 1.4 Hz, H-5), 7.14 (1H, s, H-3), 6.77 (1H, d, J = 8.4 Hz, H-6), 2.24 (2H, t, J = 7.3 Hz, H-2'), 2.10 (3H, s, H-10), 1.56 (2H, m, H-3'), 1.20 - 1.32 (16H, m, H-4', 5', 6', 7', 8', 9', 10', 11'), 0.85 (3H, t, J = 6.9 Hz, H-12'). <sup>13</sup>C NMR (126MHz, DMSO-d<sub>6</sub>)  $\delta$  = 171.9 (C-1'), 166.8 (C-1), 156.8 (C-7), 132.5 (C-9), 132.4 (C-3), 129.5 (C-5), 124.5 (C-4), 124.0 (C-8), 123.8 (C-2), 114.5 (C-6), 35.2 (C-2'), 31.3 (C-10'), 29.0 - 28.6 (C-4', 5', 6', 7', 8', 9'), 25.1 (C-3'), 22.1 (C-11'), 16.0 (C-10), 13.9 (C-12').

### Structure Elucidation

The analysis of the culture broth of strain Mal15<sup>T</sup> for potential bioactive secondary metabolites led to the isolation of five previously undescribed compounds (Supplementary Figs. 7 and 8). Stieleriacine A<sub>1</sub> (1) was isolated as an off-white, amorphous solid. Its

molecular formula was determined by HRESIMS as  $C_{22}H_{31}NO_4$ , implying eight degrees of unsaturation. The  $^1H$  NMR exhibited signals of three aromatic protons ( $\delta$  6.77, 7.28, 7.35), three methines ( $\delta$  6.11, 6.69, 7.17), a singlet for a methyl group ( $\delta$  2.08), methylene group proton signals ( $\delta$  1.26, 1.43, 2.18) and a triplet for a methyl group ( $\delta$  0.85). Singlets at  $\delta$  9.29 and 9.82 were attributed to an NH and OH group, respectively. The  $^{13}C$  and distortionless enhancement by polarisation transfer (DEPT) spectra shows 22 carbon signals, being one carboxy, one carbonyl, three aromatic methines, three aromatic quaternary carbons, two methyls, eight methylenes, three methines, and one quaternary  $sp^3$  hybridised carbon.  $^1H, ^1H$  correlated spectroscopy (COSY) and  $^1H, ^{13}C$  heteronuclear multiple bond correlation (HMBC) spectra revealed a dodecenoyl moiety with the double bond in *E* configuration between C-2' and C-3' attached via an amide bond to *meta*-methyl-dehydrotyrosine (Supplementary Fig. 8). ROE correlations support the double bond between C-2 and C-3 to be in *Z* configuration (Supplementary Fig. 8). The NMR data were similar compared to the previously reported thalassotalic acids<sup>16</sup> with differences in the length of the side chain moiety, a methyl group in *meta*-position of the aromatic ring, and the degree of unsaturation of the latter.

Stieleriacine B<sub>1</sub> (**2**), an off-white amorphous powder, was identified as  $C_{22}H_{33}NO_4$  by HRESIMS, indicating seven degrees of unsaturation. The major difference in the NMR data of **2** compared to **1** was the absence of the doublet ( $\delta$  6.11) and the doublet of triplets ( $\delta$  6.69) in the  $^1H$  NMR, as well as the corresponding carbon atoms at 123.8 and 144.2 ppm, respectively. Instead a new multiplet ( $\delta$  1.55) appears corresponding to a methylene carbon signal ( $\delta$  35.3). The integration of the peak at 1.26 ppm corresponding to methylenes in the heteronuclear single quantum coherence (HSQC)-dept also shows two more protons, confirming the absence of the double bond in the side chain moiety. The carbon shift of C-3 ( $\delta$  131.7) could be retrieved from HSQC data. The shift of carbon C-2 remains unclear. Measuring of compound **2** in a different solvent, like acetone- $d_6$ , did not bring clarity to the exact position. Likewise, to compound **1**, C-2 is also not showing any HMBC correlations. However, comparison to compounds **1** and **5** allows the suggestion that the shift of C-2 is overlapping with C-8 ( $\delta$  123.7).

Stieleriacine C (**3**), a light yellow amorphous solid, has a molecular formula of  $C_{22}H_{35}NO_4$  as determined by HRESIMS, suggesting six degrees of unsaturation. The only noticeable difference to compound **2** in the NMR data is the appearance of a multiplet ( $\delta$  4.26) and two doublets of doublets ( $\delta$  2.87 and 2.68) in the  $^1H$  NMR. The  $^{13}C$  NMR shows a replacement of a methine and a quaternary  $sp^3$  hybridised carbon signal by a methylene ( $\delta$  36.1) and a methine ( $\delta$  53.9), respectively. HMBC correlations and a negative optical rotation further endorse a *meta*-methylated L-tyrosine moiety.

Stieleriacine  $A_2$  (**4**), an off-white, amorphous solid, was determined by HRESIMS to possess a molecular formula of  $C_{22}H_{31}NO_4$ , proposing eight degrees of unsaturation (Supplementary Fig. 8). Despite the absence of one carbon atom, the NMR data is fairly consistent with stieleriacine  $A_1$  (**1**), with the only noteworthy difference in the absence of correlations between the NH proton signal with H-5 and H-9 in the rotating frame nuclear Overhauser effect correlation spectroscopy (ROESY) spectra (Supplementary Fig. 8). This difference affirms the double bond between C-2 and C-3 of compound **4** to be in *E* configuration.

Stieleriacine  $B_2$  (**5**) was isolated as an off-white, amorphous powder and could be assigned a molecular formula of  $C_{22}H_{33}NO_4$  by HRESIMS, indicating seven degrees of unsaturation. The NMR data is in accordance with the data set of stieleriacine  $B_1$  (**2**), with the main difference being the missing correlations of the NH proton signal with H-5 and H-9 in the ROESY spectra, which allows the conclusion that the double bond between C-2 and C-3 of compound **5** is in *E* configuration.

### Bioactivities of Stieleriacines

All compounds were tested against a variety of bacteria and fungi in an antimicrobial activity assay (Supplementary Table 1). Stieleriacine  $A_1$  (**1**) had weak activity against *Bacillus subtilis* (minimal inhibitory concentration (MIC) 50  $\mu$ g/mL), *Mucor hiemalis* (MIC 67  $\mu$ g/mL), and *Rhodotorula glutinis* (MIC 67  $\mu$ g/mL). Stieleriacine  $B_1$  (**2**) showed weak activity against *B. subtilis* (MIC 67  $\mu$ g/mL) and *Micrococcus luteus* (MIC 50  $\mu$ g/mL). Furthermore, stieleriacine C (**3**) also had weak activity against *B. subtilis* (MIC 67  $\mu$ g/mL), *Mucor plumbeus* (MIC 50

$\mu\text{g/mL}$ ) and *Staphylococcus aureus* (MIC 67  $\mu\text{g/mL}$ ). Stieleriaine A<sub>2</sub> (4) showed weak activity against *B. subtilis* (MIC 67  $\mu\text{g/mL}$ ), *M. luteus* (MIC 50  $\mu\text{g/mL}$ ) and *S. aureus* (MIC 67  $\mu\text{g/mL}$ ). Likewise, stieleriaine B<sub>2</sub> had a weak activity against *B. subtilis* (MIC 67  $\mu\text{g/mL}$ ), *M. luteus* (MIC 100  $\mu\text{g/mL}$ ) and *S. aureus* (MIC 67  $\mu\text{g/mL}$ ). None of the above-mentioned compounds showed signs of cytotoxicity in a proliferation assay against the mouse fibroblast cell line L929 and HeLa KB3.1 cells. Despite their similarity to previously isolated tyrosinase-inhibiting substances<sup>16</sup>, stieleriaines B<sub>1</sub> and B<sub>2</sub> did not inhibit mushroom tyrosinase in our experiments. Stieleriaines A<sub>1</sub> and A<sub>2</sub> exhibited weak inhibiting effects (IC<sub>50</sub> 1.4 mM and 1.9 mM, respectively) compared to the known tyrosinase inhibitors arbutin (IC<sub>50</sub> 140  $\mu\text{M}$ ) and kojic acid (IC<sub>50</sub> 110  $\mu\text{M}$ ). Likewise, stieleriaine C showed weak tyrosinase inhibiting effects (IC<sub>50</sub> 0.9 mM) (for more details see Supplementary Table 6).

#### **Effect of Stieleriaine A<sub>1</sub> on *Stieleria maiorica***

To analyse the physiological impact of stieleriaine A<sub>1</sub> on Mal15<sup>T</sup> cells, the cell cycle was determined by time-lapse microscopy (Fig. 3). The cell cycle was separated into three phases: T<sub>0</sub> = duration of lag-phase; T<sub>1</sub> = duration of daughter cell formation until release, T<sub>2</sub> = duration of the gap after daughter cell release (T<sub>1</sub>) until next daughter cell formation and T<sub>3</sub> = complete reproduction cycle (T<sub>1</sub> + T<sub>2</sub>). No significant difference of T<sub>3</sub> was observed for cells incubated with a physiological concentration (1.34  $\mu\text{M}$ ) of stieleriaine A<sub>1</sub>. Untreated cells showed a mean duration of T<sub>1</sub> = 116.05 min and T<sub>2</sub> = 132.71 min (T<sub>3</sub> = 248.8 min), while treated cells showed a mean duration of T<sub>1</sub> = 115.93 min and T<sub>2</sub> = 137.53 min (T<sub>3</sub> = 253.5 min). T<sub>0</sub> and T<sub>1</sub> of untreated Mal15<sup>T</sup> cells and cells treated with 1.34  $\mu\text{M}$  stieleriaine A<sub>1</sub> are listed in Supplementary Table 2. A significant difference was observed for T<sub>0</sub>. Untreated cells displayed a T<sub>0</sub> (p = 0.0001) duration of 375.6 min (6.25 h), whereas cells treated with stieleriaine A<sub>1</sub> required 310.0 min (5.16 h) to start division (Fig. 3). In total, T<sub>0</sub> duration was 65.6 min shorter in the presence of stieleriaine A<sub>1</sub>.

## Effect of Stieleriactin A<sub>1</sub> on strains of the 'Roseobacter group'

The standardised biofilm formation assay revealed a significant increase (35%,  $p < 0.001$ ) in biofilm formation of *P. inhibens* DSM 17395 in the presence of 134  $\mu\text{M}$  stieleriactin A<sub>1</sub> (Fig. 4). However, the same treatment of *Sulfitobacter dubius* DSM 16472<sup>T</sup> cultures resulted in a 15% ( $p < 0.001$ ) lower capacity of biofilm formation (Fig. 4). Physiological concentrations of stieleriactin A<sub>1</sub> (1.34  $\mu\text{M}$ ) did not significantly affect the capacity to form biofilms of both *P. inhibens* and *S. dubius* (Fig. 4a). In a further approach, we tested whether stieleriactin A<sub>1</sub> interacts with the LuxI/LuxR system. Thus, we applied the biofilm formation assay on two independent transposon mutants (Tm#3902, Tm#3163) of the exclusive LuxI/LuxR system (PGA1\_c03880)<sup>17</sup> in *P. inhibens* DSM 17395 (Supplementary Fig. 1). Both  $\Delta luxR$  transposon mutants showed almost identical absorbance values for CV at 595 nm in the biofilm formation assay. Thus, they were combined and treated as biological replicates (Fig. 4b). Controls revealed that neither the interruption of the *luxR* coding sequence nor the presence of the transposon itself seem to influence the amount or strength of biofilm formation in the controls. However, results for the  $\Delta luxR$  strains display a significant effect on the biofilm formation capacity when the  $\Delta luxR$  cells were treated with both tested concentrations of stieleriactin A<sub>1</sub> (134  $\mu\text{M}$ , 57.5% ( $p < 0.001$ ), 1.34  $\mu\text{M}$ , 17.8% ( $p = 0.05$ )). A significant increase of biofilm amount can be observed compared to the controls (Supplementary Fig. 10). Remarkably, the effects on biofilm formation with 134  $\mu\text{M}$  stieleriactin A<sub>1</sub> are even significantly stronger (38.4%) for the  $\Delta luxR$  mutants than for the wild type (Fig. 4).

## Supplementary Methods

### Conditions for isolation of strain Mal15<sup>T</sup>

Seawater sediment samples from 30 cm depth were used for the targeted isolation of novel planctomycetes. In general, the composition of the used medium was inspired by previous work on cultivation of planctomycetes<sup>18,19</sup>. Given that all known members of the phylum *Planctomycetes* show high tolerance against  $\beta$ -lactam antibiotics, probably due to presence of  $\beta$ -lactamases<sup>20</sup>,  $\beta$ -lactam antibiotics were used as selection pressure. In addition,



cycloheximide was used as antifungal agent. Obtained colonies of resistant bacteria were screened by 16S rRNA gene sequencing.

### **Genome information**

The genome and 16S rRNA gene sequence of strain Mal15<sup>T</sup> are available from GenBank under accession numbers CP036264 and MK554562, respectively.

### **Identification of transposon insertions within the *luxR* gene of *P. inhibens***

We identified transposon insertions into the *luxR* gene (PGA1\_c03880) of *P. inhibens* DSM 17395 employing the length difference observed in gel electrophoresis using primers P1903 (5'-CAGTGGGTTGTGACGCTAGA-3') and P1904 (5'-AGGACCAGATTACGACCAGA-3'), cf. Supplementary Fig. 1.

## Supplementary References

- 1 Yarza, P. *et al.* Uniting the classification of cultured and uncultured bacteria and archaea using 16S rRNA gene sequences. *Nat. Rev. Microbiol.* **12**, 635-645, doi:10.1038/nrmicro3330 (2014).
- 2 Kallscheuer, N. *et al.* Description of three bacterial strains belonging to the new genus *Novipirellula* gen. nov., reclassification of *Rhodopirellula rosea* and *Rhodopirellula caenicola* and readjustment of the genus threshold of the phylogenetic marker *rpoB* for *Planctomycetaceae*. *Antonie Van Leeuwenhoek*, doi: 10.1007/s10482-019-01374-5 (2019).
- 3 Konstantinidis, K. T. & Tiedje, J. M. Towards a genome-based taxonomy for prokaryotes. *J. Bacteriol.* **187**, 6258-6264 (2005).
- 4 Qin, Q.-L. *et al.* A proposed genus boundary for the prokaryotes based on genomic insights. *J. Bacteriol.* **196**, 2210-2215 (2014).
- 5 Kohn, T. *et al.* *Fuerstia marisgermanicae* gen. nov., sp. nov., an Unusual Member of the Phylum Planctomycetes from the German Wadden Sea. *Front. Microbiol.* **7**, 2079, doi:10.3389/fmicb.2016.02079 (2016).
- 6 Fuerst, J. A. & Sagulenko, E. Beyond the bacterium: Planctomycetes challenge our concepts of microbial structure and function. *Nat. Rev. Microbiol.* **9**, 403-413, doi:10.1038/nrmicro2578 (2011).
- 7 Jeske, O., Jogler, M., Petersen, J., Sikorski, J. & Jogler, C. From genome mining to phenotypic microarrays: Planctomycetes as source for novel bioactive molecules. *Antonie Van Leeuwenhoek* **104**, 551-567, doi:10.1007/s10482-013-0007-1 (2013).
- 8 Graça, A. P., Calisto, R. & Lage, O. M. Planctomycetes as Novel Source of Bioactive Molecules. *Front. Microbiol.* **7**, 1241, doi:10.3389/fmicb.2016.01241 (2016).
- 9 Challinor, V. L. & Bode, H. B. Bioactive natural products from novel microbial sources. *Ann. NY Acad. Sci.* **1354**, 82-97, doi:10.1111/nyas.12954 (2015).
- 10 Weber, T. *et al.* antiSMASH 3.0-a comprehensive resource for the genome mining of biosynthetic gene clusters. *Nucleic Acids Res.* **43**, W237-243, doi:10.1093/nar/gkv437 (2015).
- 11 Aghnatiou, R. *et al.* Draft genome of *Gemmata massiliana* sp. nov, a water-borne *Planctomycetes* species exhibiting two variants. *Stand. Genomic Sci.* **10**, 120, doi:10.1186/s40793-015-0103-0 (2015).
- 12 Donadio, S., Monciardini, P. & Sosio, M. Polyketide synthases and nonribosomal peptide synthetases: the emerging view from bacterial genomics. *Nat. Prod. Rep.* **24**, 1073-1109, doi:10.1039/b514050c (2007).
- 13 van Wezel, G. P. & McDowall, K. J. The regulation of the secondary metabolism of *Streptomyces*: new links and experimental advances. *Nat. Prod. Rep.* **28**, 1311-1333, doi:10.1039/c1np00003a (2011).
- 14 Gomez-Escribano, J. P. & Bibb, M. J. *Streptomyces coelicolor* as an expression host for heterologous gene clusters. *Method. Enzymol.* **517**, 279-300, doi:10.1016/B978-0-12-404634-4.00014-0 (2012).
- 15 Yamada, Y., Cane, D. E. & Ikeda, H. Diversity and analysis of bacterial terpene synthases. *Method. Enzymol.* **515**, 123-162, doi:10.1016/B978-0-12-394290-6.00007-0 (2012).
- 16 Deering, R. W. *et al.* *N*-Acyl Dehydrotyrosines, Tyrosinase Inhibitors from the Marine Bacterium *Thalassotalea* sp. PP2-459. *J. Nat. Prod.* **79**, 447-450, doi:10.1021/acs.jnatprod.5b00972 (2016).
- 17 Berger, M., Neumann, A., Schulz, S., Simon, M. & Brinkhoff, T. Tropodithietic acid production in *Phaeobacter gallaeciensis* is regulated by *N*-acyl homoserine lactone-mediated quorum sensing. *J. Bacteriol.* **193**, 6576-6585, doi:10.1128/JB.05818-11 (2011).
- 18 Schlesner, H. The development of media suitable for the microorganisms morphologically resembling *Planctomyces* spp., *Pirellula* spp., and other

- Planctomycetales from various aquatic habitats using dilute media. *Syst. Appl. Microbiol.* **17**, 135-145 (1994).
- 19 Lage, O. M. & Bondoso, J. Bringing Planctomycetes into pure culture. *Front. Microbiol.* **3**, 405, doi:10.3389/fmicb.2012.00405 (2012).
- 20 Jeske, O. *et al.* Planctomycetes do possess a peptidoglycan cell wall. *Nat. Commun.* **6**, 7116, doi:10.1038/ncomms8116 (2015).
