# Supplementary material for: The planctomycete Stieleria maiorica Mal15T employs stieleriacines to alter the species composition in marine biofilms
Source: PubMed Central journal article supplement (PMC7293339; doi:10.1038/s42003-020-0993-2), 2020-06-12
Supplement: 42003_2020_993_MOESM4_ESM.pdf [file 42003_2020_993_MOESM4_ESM.pdf]

## Description of Additional Supplementary Files

### **File Name:** Supplementary Movie 1

**Description:** **Time-lapse microscopy of dividing Mal15<sup>T</sup> cells.** Cells of strain Mal15<sup>T</sup> were observed during their cell division cycle using the CellASIC® ONIX Microfluidic Platform. Elastically trapped cells were cultivated in M1H NAG ASW and supplemented with 3.3 µL acetone. Cells were monitored for 32 h at 28 °C. Images were taken every 10 min using phase contrast microscopy. Cells start to divide after 6.25 h in average, if no stieleriaccine A<sub>1</sub> was applied to the experimental setting.

### **File Name:** Supplementary Movie 2

**Description:** **Time-lapse microscopy of dividing Mal15<sup>T</sup> cells treated with 1.34 µM stieleriaccine A<sub>1</sub>.** To analyse the physiological effect of stieleriaccine A<sub>1</sub> under microfluidic conditions, Mal15<sup>T</sup> cells were observed during their cell division cycle using the CellASIC® ONIX Microfluidic Platform. Elastically trapped cells were cultivated in M1H NAG ASW supplemented with 1.34 µM stieleriaccine A<sub>1</sub> dissolved in 3.3 µL acetone. Cells were monitored for 32 h at 28 °C. Images were taken every 10 min using phase contrast microscopy. Mimicking a dense population by adding constantly physiological concentrations (1.34 µM) of stieleriaccine A<sub>1</sub> leads to a significantly reduced lag phase compared to untreated cultures (5.16 h).
